# Supplementary material for: Phenotypic and Proteomic Analysis Identifies Hallmarks of Blood Circulating Extracellular Vesicles in NSCLC Responders to Immune Checkpoint Inhibitors
Source: Cancers (Basel). 2021 Feb 3;13(4):585. doi: 10.3390/cancers13040585 (PMC7913165; doi:10.3390/cancers13040585)
Supplement: Supplementary file 1 [file cancers-13-00585-s001.zip]

Archive with 5 entries (5 files):
- cancers-1075777-SUPPL-FINAL.docx
- cancers-1075777-SUPPL-FINAL.pdf
- Supplementary Table 11_Functional analysis.xlsx
- Supplementary Table 12_List of Enriched Gene Ontology (GO) Pathways.xlsx
- Supplementary Table 9_Protein identification.xlsx
