# Supplementary material for: Phenotypic and Proteomic Analysis Identifies Hallmarks of Blood Circulating Extracellular Vesicles in NSCLC Responders to Immune Checkpoint Inhibitors
Source: Cancers (Basel). 2021 Feb 3;13(4):585. doi: 10.3390/cancers13040585 (PMC7913165; doi:10.3390/cancers13040585)
Supplement: Supplementary file 1 [file cancers-13-00585-s001.zip › Supplementary Table 9_Protein identification.xlsx]

## Sheet: raw data
Protein IDs	Majority protein IDs	Peptide counts (all)	Peptide counts (razor+unique)	Peptide counts (unique)	Protein names	Gene names	Fasta headers	Number of proteins	Peptides	Razor + unique peptides	Unique peptides	Peptides NRP A	Peptides NRP B	Peptides NRP C	Peptides RP A	Peptides RP B	Peptides RP C	Peptides NRB A	Peptides NRB B	Peptides NRB C	Peptides RB A	Peptides RB B	Peptides RB C	Razor + unique peptides NRP A	Razor + unique peptides NRP B	Razor + unique peptides NRP C	Razor + unique peptides RP A	Razor + unique peptides RP B	Razor + unique peptides RP C	Razor + unique peptides NRB A	Razor + unique peptides NRB B	Razor + unique peptides NRB C	Razor + unique peptides RB A	Razor + unique peptides RB B	Razor + unique peptides RB C	Unique peptides NRP A	Unique peptides NRP B	Unique peptides NRP C	Unique peptides RP A	Unique peptides RP B	Unique peptides RP C	Unique peptides NRB A	Unique peptides NRB B	Unique peptides NRB C	Unique peptides RB A	Unique peptides RB B	Unique peptides RB C	Sequence coverage [%]	Unique + razor sequence coverage [%]
A2NJV5;A0A0A0MRZ7;A0A075B6S6;A0A075B6S2;A0A075B6P5;A0A087WW87;P06310;P01615;P01614	A2NJV5;A0A0A0MRZ7;A0A075B6S6;A0A075B6S2;A0A075B6P5;A0A087WW87;P06310;P01615;P01614	1;1;1;1;1;1;1;1;1	1;1;1;1;1;1;1;1;1	1;1;1;1;1;1;1;1;1	Ig kappa chain V-II region RPMI 6410;Ig kappa chain V-II region FR;Ig kappa chain V-II region Cum	IGKV A18;IGKV2D-26;IGKV2D-30;IGKV2D-29;IGKV2D-28;IGKV2-40	sp|A2NJV5|KV229_HUMAN Immunoglobulin kappa variable 2-29 OS=Homo sapiens OX=9606 GN=IGKV2-29 PE=3 SV=2;sp|A0A0A0MRZ7|KVD26_HUMAN Immunoglobulin kappa variable 2D-26 OS=Homo sapiens OX=9606 GN=IGKV2D-26 PE=3 SV=1;sp|A0A075B6S6|KVD30_HUMAN Immunoglobulin kap	9	1	1	1	1	0	1	0	0	0	1	1	1	1	0	1	1	0	1	0	0	0	1	1	1	1	0	1	1	0	1	0	0	0	1	1	1	1	0	1	10.8	10.8
A0A0B4J2B5	A0A0B4J2B5	1	1	1		IGHV3OR16-9	tr|A0A0B4J2B5|A0A0B4J2B5_HUMAN Immunoglobulin heavy variable 3/OR16-9 (non-functional) (Fragment) OS=Homo sapiens OX=9606 GN=IGHV3OR16-9 PE=1 SV=1	1	1	1	1	1	0	1	0	0	0	1	0	0	1	0	1	1	0	1	0	0	0	1	0	0	1	0	1	1	0	1	0	0	0	1	0	0	1	0	1	19.4	19.4
P0DP03;A0A0J9YY99;P01768;P01764;A0A0C4DH42;P0DP02;A0A0B4J1X5;A0A075B7E8;A0A075B7B8;P01767;P01772	P0DP03;A0A0J9YY99;P01768;P01764;A0A0C4DH42;P0DP02;A0A0B4J1X5;A0A075B7E8;A0A075B7B8;P01767;P01772	2;2;2;2;1;1;1;1;1;1;1	2;2;2;2;1;1;1;1;1;1;1	2;2;2;2;1;1;1;1;1;1;1	Ig heavy chain V-III region CAM;Ig heavy chain V-III region 23;Ig heavy chain V-III region BUT;Ig heavy chain V-III region KOL	IGHV3-23;IGHV3-66;IGHV3-74;IGHV3OR16-13;IGHV3OR16-12	sp|P0DP03|HV335_HUMAN Immunoglobulin heavy variable 3-30-5 OS=Homo sapiens OX=9606 GN=IGHV3-30-5 PE=3 SV=1;tr|A0A0J9YY99|A0A0J9YY99_HUMAN Uncharacterized protein (Fragment) OS=Homo sapiens OX=9606 PE=1 SV=1;sp|P01768|HV330_HUMAN Immunoglobulin heavy variab	11	2	2	2	2	1	1	0	0	0	2	1	2	2	0	2	2	1	1	0	0	0	2	1	2	2	0	2	2	1	1	0	0	0	2	1	2	2	0	2	18.8	18.8
A1A4V9	A1A4V9	1	1	1	Coiled-coil domain-containing protein C16orf93	C16orf93	sp|A1A4V9|CC189_HUMAN Coiled-coil domain-containing protein 189 OS=Homo sapiens OX=9606 GN=CCDC189 PE=2 SV=1	1	1	1	1	0	0	0	0	0	0	0	0	1	0	0	0	0	0	0	0	0	0	0	0	1	0	0	0	0	0	0	0	0	0	0	0	1	0	0	0	2.7	2.7
A4FU01	A4FU01	1	1	1	Myotubularin-related protein 11	MTMR11	sp|A4FU01|MTMRB_HUMAN Myotubularin-related protein 11 OS=Homo sapiens OX=9606 GN=MTMR11 PE=2 SV=2	1	1	1	1	0	0	0	0	0	0	0	0	0	1	0	0	0	0	0	0	0	0	0	0	0	1	0	0	0	0	0	0	0	0	0	0	0	1	0	0	2.1	2.1
A8MVM7	A8MVM7	1	1	1	Putative uncharacterized protein ENSP00000382790		sp|A8MVM7|YD021_HUMAN Putative uncharacterized protein ENSP00000382790 OS=Homo sapiens OX=9606 PE=5 SV=3	1	1	1	1	0	0	0	0	0	0	0	1	0	0	0	0	0	0	0	0	0	0	0	1	0	0	0	0	0	0	0	0	0	0	0	1	0	0	0	0	1.6	1.6
B1AK53	B1AK53	1	1	1	Espin	ESPN	sp|B1AK53|ESPN_HUMAN Espin OS=Homo sapiens OX=9606 GN=ESPN PE=1 SV=1	1	1	1	1	0	0	0	1	0	0	0	0	0	0	0	0	0	0	0	1	0	0	0	0	0	0	0	0	0	0	0	1	0	0	0	0	0	0	0	0	1.2	1.2
CON__ENSEMBL:ENSBTAP00000038253	CON__ENSEMBL:ENSBTAP00000038253	9	1	1				1	9	1	1	8	1	8	1	2	0	7	1	6	8	0	7	0	0	0	1	0	0	0	0	0	0	0	0	0	0	0	1	0	0	0	0	0	0	0	0	12.2	1.8
CON__ENSEMBL:ENSP00000377550;P13646;CON__P13646-1;CON__P08730-1;Q2M2I5;CON__Q9D312;CON__P35900;CON__Q2M2I5;P35900;O76013;Q14525;CON__REFSEQ:XP_986630;CON__O76014;CON__O76013;CON__O76015;CON__Q497I4;CON__A2AB72;CON__Q8N1A0;O76014;Q92764;P05783;CON__P05784;CON__Q14525;CON__Q92764;CON__Q9UE12;CON__Q15323;CON__A2A5Y0;Q15323;O76015;Q8N1A0	CON__ENSEMBL:ENSP00000377550;P13646;CON__P13646-1;CON__P08730-1	8;8;7;5;2;2;2;2;2;1;1;1;1;1;1;1;1;1;1;1;1;1;1;1;1;1;1;1;1;1	2;2;2;0;0;0;0;0;0;0;0;0;0;0;0;0;0;0;0;0;0;0;0;0;0;0;0;0;0;0	2;2;2;0;0;0;0;0;0;0;0;0;0;0;0;0;0;0;0;0;0;0;0;0;0;0;0;0;0;0	Keratin, type I cytoskeletal 13	KRT13	;sp|P13646|K1C13_HUMAN Keratin, type I cytoskeletal 13 OS=Homo sapiens OX=9606 GN=KRT13 PE=1 SV=4;;	30	8	2	2	4	1	6	0	1	0	4	2	3	7	1	7	0	0	1	0	0	0	1	1	0	2	0	2	0	0	1	0	0	0	1	1	0	2	0	2	16.2	6.2
CON__P00761	CON__P00761	6	6	6				1	6	6	6	6	1	6	1	0	2	3	3	2	6	1	6	6	1	6	1	0	2	3	3	2	6	1	6	6	1	6	1	0	2	3	3	2	6	1	6	37.2	37.2
CON__P02533;P02533;CON__Q6IFX2;CON__P19012;CON__A2A4G1;P19012;CON__P19001;CON__Q7Z3Y9;Q7Z3Y9	CON__P02533;P02533	20;20;9;5;5;5;3;1;1	18;18;8;4;3;4;2;0;0	4;4;2;0;0;0;0;0;0	Keratin, type I cytoskeletal 14	KRT14	;sp|P02533|K1C14_HUMAN Keratin, type I cytoskeletal 14 OS=Homo sapiens OX=9606 GN=KRT14 PE=1 SV=4	9	20	18	4	17	3	18	2	1	0	12	3	13	17	1	17	16	3	17	2	1	0	11	3	12	16	1	16	4	1	4	0	0	0	1	0	2	2	0	2	46	42.6
CON__P02538;P02538;CON__P48668;P48668;CON__P04259;CON__P50446;CON__Q8BGZ7;CON__O95678;O95678;CON__Q8VED5;CON__P07744	CON__P02538;P02538;CON__P48668;P48668;CON__P04259;CON__P50446	20;20;19;19;18;10;7;7;7;5;4	12;12;11;11;10;6;3;3;3;2;1	2;2;2;2;1;1;1;1;1;0;0	Keratin, type II cytoskeletal 6A;Keratin, type II cytoskeletal 6C	KRT6A;KRT6C	;sp|P02538|K2C6A_HUMAN Keratin, type II cytoskeletal 6A OS=Homo sapiens OX=9606 GN=KRT6A PE=1 SV=3;;sp|P48668|K2C6C_HUMAN Keratin, type II cytoskeletal 6C OS=Homo sapiens OX=9606 GN=KRT6C PE=1 SV=3;;	11	20	12	2	17	4	17	4	2	0	15	5	14	18	3	17	10	2	10	2	1	0	8	2	8	10	2	9	2	0	2	0	0	0	2	1	2	2	0	2	32.6	23
CON__P02754	CON__P02754	4	4	4				1	4	4	4	3	1	4	0	0	0	2	1	1	2	1	3	3	1	4	0	0	0	2	1	1	2	1	3	3	1	4	0	0	0	2	1	1	2	1	3	28.4	28.4
CON__P02768-1;P02768	CON__P02768-1;P02768	41;41	41;41	36;36	Serum albumin	ALB	;sp|P02768|ALBU_HUMAN Serum albumin OS=Homo sapiens OX=9606 GN=ALB PE=1 SV=2	2	41	41	36	33	5	36	3	2	2	27	11	32	35	7	35	33	5	36	3	2	2	27	11	32	35	7	35	29	4	32	3	2	2	24	9	29	30	6	30	55.3	55.3
CON__P02769	CON__P02769	23	18	18				1	23	18	18	21	2	22	1	1	0	10	5	11	20	2	19	17	1	18	1	1	0	7	3	8	15	1	14	17	1	18	1	1	0	7	3	8	15	1	14	45.8	39.5
CON__P07477;P07477	CON__P07477;P07477	1;1	1;1	1;1	Trypsin-1;Alpha-trypsin chain 1;Alpha-trypsin chain 2	PRSS1	;sp|P07477|TRY1_HUMAN Trypsin-1 OS=Homo sapiens OX=9606 GN=PRSS1 PE=1 SV=1	2	1	1	1	1	0	1	0	0	0	1	0	0	1	0	1	1	0	1	0	0	0	1	0	0	1	0	1	1	0	1	0	0	0	1	0	0	1	0	1	4	4
CON__P08727;P08727	CON__P08727;P08727	4;4	1;1	1;1	Keratin, type I cytoskeletal 19	KRT19	;sp|P08727|K1C19_HUMAN Keratin, type I cytoskeletal 19 OS=Homo sapiens OX=9606 GN=KRT19 PE=1 SV=4	2	4	1	1	3	0	3	0	0	0	3	1	1	3	0	3	1	0	1	0	0	0	1	1	0	1	0	1	1	0	1	0	0	0	1	1	0	1	0	1	8.5	2.2
CON__P08779;P08779;CON__Q9Z2K1;CON__Q3ZAW8	CON__P08779;P08779	18;18;7;7	8;8;1;1	8;8;1;1	Keratin, type I cytoskeletal 16	KRT16	;sp|P08779|K1C16_HUMAN Keratin, type I cytoskeletal 16 OS=Homo sapiens OX=9606 GN=KRT16 PE=1 SV=4	4	18	8	8	15	1	16	1	1	0	12	1	11	15	1	15	7	0	7	1	0	0	5	0	4	6	0	6	7	0	7	1	0	0	5	0	4	6	0	6	41.6	23.3
CON__P13645;P13645;CON__P02535-1;CON__Q7Z3Y7;Q7Z3Y7;CON__Q148H6;CON__Q7Z3Z0;CON__Q7Z3Y8;Q7Z3Z0;Q7Z3Y8	CON__P13645;P13645	25;25;8;4;4;3;2;2;2;2	25;25;8;4;4;3;2;2;2;2	21;21;4;2;2;1;1;1;1;1	Keratin, type I cytoskeletal 10	KRT10	;sp|P13645|K1C10_HUMAN Keratin, type I cytoskeletal 10 OS=Homo sapiens OX=9606 GN=KRT10 PE=1 SV=6	10	25	25	21	23	7	23	4	1	1	14	7	15	21	1	19	23	7	23	4	1	1	14	7	15	21	1	19	20	7	20	4	1	1	11	6	12	18	1	16	35.6	35.6
P13647;CON__P13647;CON__Q7RTS7;P05787;CON__P05787;Q7RTS7;CON__H-INV:HIT000016045;P12036;Q9NSB2;Q3SY84;CON__Q9DCV7;CON__Q3SY84;CON__Q6IME9;CON__Q9NSB2;CON__Q14CN4-1;CON__Q9H552;Q14CN4;CON__Q6ISB0	P13647;CON__P13647	24;24;3;3;3;3;2;2;1;1;1;1;1;1;1;1;1;1	19;19;0;0;0;0;0;0;0;0;0;0;0;0;0;0;0;0	5;5;0;0;0;0;0;0;0;0;0;0;0;0;0;0;0;0	Keratin, type II cytoskeletal 5	KRT5	sp|P13647|K2C5_HUMAN Keratin, type II cytoskeletal 5 OS=Homo sapiens OX=9606 GN=KRT5 PE=1 SV=3;	18	24	19	5	22	2	21	4	1	0	16	7	17	23	1	23	18	0	17	2	0	0	11	4	13	18	0	18	4	0	3	1	0	0	2	1	5	4	0	5	34.7	30.3
CON__P35527;P35527	CON__P35527;P35527	16;16	16;16	16;16	Keratin, type I cytoskeletal 9	KRT9	;sp|P35527|K1C9_HUMAN Keratin, type I cytoskeletal 9 OS=Homo sapiens OX=9606 GN=KRT9 PE=1 SV=3	2	16	16	16	13	3	15	3	2	1	13	3	11	13	1	14	13	3	15	3	2	1	13	3	11	13	1	14	13	3	15	3	2	1	13	3	11	13	1	14	28.4	28.4
CON__P35908v2;CON__P35908;P35908;CON__Q9R0H5	CON__P35908v2;CON__P35908;P35908	30;30;30;2	27;27;27;1	19;19;19;0	Keratin, type II cytoskeletal 2 epidermal	KRT2	;;sp|P35908|K22E_HUMAN Keratin, type II cytoskeletal 2 epidermal OS=Homo sapiens OX=9606 GN=KRT2 PE=1 SV=2	4	30	27	19	28	5	28	4	3	0	19	6	25	26	2	27	25	4	25	4	3	0	16	5	22	23	2	25	18	2	18	3	1	0	9	3	16	15	1	17	49.1	46
CON__Q04695;Q04695;CON__Q9QWL7;CON__Q9C075;CON__Q99PS0;Q9C075	CON__Q04695;Q04695;CON__Q9QWL7	12;12;10;1;1;1	3;3;2;1;1;1	3;3;2;1;1;1	Keratin, type I cytoskeletal 17	KRT17	;sp|Q04695|K1C17_HUMAN Keratin, type I cytoskeletal 17 OS=Homo sapiens OX=9606 GN=KRT17 PE=1 SV=2;	6	12	3	3	8	2	10	2	1	0	9	3	5	10	1	11	2	0	3	0	0	0	3	1	1	2	0	3	2	0	3	0	0	0	3	1	1	2	0	3	26.2	7.9
CON__Q0VBK2	CON__Q0VBK2	1	1	1				1	1	1	1	0	0	0	0	0	0	0	0	0	1	0	1	0	0	0	0	0	0	0	0	0	1	0	1	0	0	0	0	0	0	0	0	0	1	0	1	3.1	3.1
CON__Q14532;Q14532	CON__Q14532;Q14532	2;2	1;1	1;1	Keratin, type I cuticular Ha2	KRT32	;sp|Q14532|K1H2_HUMAN Keratin, type I cuticular Ha2 OS=Homo sapiens OX=9606 GN=KRT32 PE=2 SV=3	2	2	1	1	0	0	0	0	0	0	0	0	0	0	0	0	0	0	0	0	0	0	0	0	0	0	0	0	0	0	0	0	0	0	0	0	0	0	0	0	4	2.5
CON__Q3SZH5	CON__Q3SZH5	1	1	1				1	1	1	1	0	0	0	0	0	0	1	0	0	0	0	0	0	0	0	0	0	0	1	0	0	0	0	0	0	0	0	0	0	0	1	0	0	0	0	0	1.7	1.7
CON__Q5D862;Q5D862	CON__Q5D862;Q5D862	2;2	2;2	2;2	Filaggrin-2	FLG2	;sp|Q5D862|FILA2_HUMAN Filaggrin-2 OS=Homo sapiens OX=9606 GN=FLG2 PE=1 SV=1	2	2	2	2	2	0	2	0	0	0	2	1	1	2	0	2	2	0	2	0	0	0	2	1	1	2	0	2	2	0	2	0	0	0	2	1	1	2	0	2	2.6	2.6
CON__Q6NXH9;CON__Q32MB2;Q86Y46	CON__Q6NXH9;CON__Q32MB2;Q86Y46	5;4;4	1;1;1	0;0;0	Keratin, type II cytoskeletal 73	KRT73	;;sp|Q86Y46|K2C73_HUMAN Keratin, type II cytoskeletal 73 OS=Homo sapiens OX=9606 GN=KRT73 PE=1 SV=1	3	5	1	0	3	1	3	1	1	0	4	3	3	4	1	4	0	0	0	0	0	0	0	1	0	0	0	0	0	0	0	0	0	0	0	0	0	0	0	0	7.4	2.2
CON__Q7RTT2;CON__Q8N1N4-2;Q8N1N4	CON__Q7RTT2;CON__Q8N1N4-2;Q8N1N4	4;4;4	2;2;2	2;2;2	Keratin, type II cytoskeletal 78	KRT78	;;sp|Q8N1N4|K2C78_HUMAN Keratin, type II cytoskeletal 78 OS=Homo sapiens OX=9606 GN=KRT78 PE=1 SV=2	3	4	2	2	1	0	2	0	0	0	2	1	1	3	0	3	0	0	1	0	0	0	0	1	0	2	0	2	0	0	1	0	0	0	0	1	0	2	0	2	7.3	3.5
CON__Q7Z794;Q7Z794	CON__Q7Z794;Q7Z794	4;4	1;1	1;1	Keratin, type II cytoskeletal 1b	KRT77	;sp|Q7Z794|K2C1B_HUMAN Keratin, type II cytoskeletal 1b OS=Homo sapiens OX=9606 GN=KRT77 PE=2 SV=3	2	4	1	1	2	0	2	0	0	0	4	1	2	3	0	4	0	0	0	0	0	0	1	0	0	0	0	1	0	0	0	0	0	0	1	0	0	0	0	1	6.4	1.7
CON__Q86YZ3;Q86YZ3	CON__Q86YZ3;Q86YZ3	6;6	6;6	6;6	Hornerin	HRNR	;sp|Q86YZ3|HORN_HUMAN Hornerin OS=Homo sapiens OX=9606 GN=HRNR PE=1 SV=2	2	6	6	6	4	0	4	0	1	1	5	3	3	5	1	4	4	0	4	0	1	1	5	3	3	5	1	4	4	0	4	0	1	1	5	3	3	5	1	4	7.1	7.1
CON__Q9NSB4;Q9NSB4	CON__Q9NSB4;Q9NSB4	1;1	1;1	1;1	Keratin, type II cuticular Hb2	KRT82	;sp|Q9NSB4|KRT82_HUMAN Keratin, type II cuticular Hb2 OS=Homo sapiens OX=9606 GN=KRT82 PE=3 SV=3	2	1	1	1	1	0	1	0	0	0	0	0	0	0	0	0	1	0	1	0	0	0	0	0	0	0	0	0	1	0	1	0	0	0	0	0	0	0	0	0	1.4	1.4
F8WAN1;Q69YQ0	F8WAN1;Q69YQ0	1;1	1;1	1;1	Cytospin-A	SPECC1L-ADORA2A;SPECC1L	tr|F8WAN1|F8WAN1_HUMAN SPECC1L-ADORA2A readthrough (NMD candidate) OS=Homo sapiens OX=9606 GN=SPECC1L-ADORA2A PE=4 SV=2;sp|Q69YQ0|CYTSA_HUMAN Cytospin-A OS=Homo sapiens OX=9606 GN=SPECC1L PE=1 SV=2	2	1	1	1	0	0	0	0	0	0	0	0	0	0	0	0	0	0	0	0	0	0	0	0	0	0	0	0	0	0	0	0	0	0	0	0	0	0	0	0	1.1	1.1
O15047	O15047	1	1	1	Histone-lysine N-methyltransferase SETD1A	SETD1A	sp|O15047|SET1A_HUMAN Histone-lysine N-methyltransferase SETD1A OS=Homo sapiens OX=9606 GN=SETD1A PE=1 SV=3	1	1	1	1	0	0	0	0	1	0	0	0	0	0	0	0	0	0	0	0	1	0	0	0	0	0	0	0	0	0	0	0	1	0	0	0	0	0	0	0	0.6	0.6
O15357	O15357	2	2	2	Phosphatidylinositol 3,4,5-trisphosphate 5-phosphatase 2	INPPL1	sp|O15357|SHIP2_HUMAN Phosphatidylinositol 3,4,5-trisphosphate 5-phosphatase 2 OS=Homo sapiens OX=9606 GN=INPPL1 PE=1 SV=2	1	2	2	2	0	1	0	1	0	1	0	0	0	0	1	0	0	1	0	1	0	1	0	0	0	0	1	0	0	1	0	1	0	1	0	0	0	0	1	0	1.9	1.9
O43933	O43933	1	1	1	Peroxisome biogenesis factor 1	PEX1	sp|O43933|PEX1_HUMAN Peroxisome biogenesis factor 1 OS=Homo sapiens OX=9606 GN=PEX1 PE=1 SV=1	1	1	1	1	0	0	0	1	1	1	0	0	0	0	1	0	0	0	0	1	1	1	0	0	0	0	1	0	0	0	0	1	1	1	0	0	0	0	1	0	0.7	0.7
O75448	O75448	1	1	1	Mediator of RNA polymerase II transcription subunit 24	MED24	sp|O75448|MED24_HUMAN Mediator of RNA polymerase II transcription subunit 24 OS=Homo sapiens OX=9606 GN=MED24 PE=1 SV=1	1	1	1	1	0	0	0	0	0	0	1	0	0	0	0	0	0	0	0	0	0	0	1	0	0	0	0	0	0	0	0	0	0	0	1	0	0	0	0	0	1.5	1.5
P00738;P00739	P00738	11;4	11;4	11;4	Haptoglobin;Haptoglobin alpha chain;Haptoglobin beta chain	HP	sp|P00738|HPT_HUMAN Haptoglobin OS=Homo sapiens OX=9606 GN=HP PE=1 SV=1	2	11	11	11	10	2	9	1	0	0	6	3	8	8	0	9	10	2	9	1	0	0	6	3	8	8	0	9	10	2	9	1	0	0	6	3	8	8	0	9	29.1	29.1
P00915	P00915	6	6	6	Carbonic anhydrase 1	CA1	sp|P00915|CAH1_HUMAN Carbonic anhydrase 1 OS=Homo sapiens OX=9606 GN=CA1 PE=1 SV=2	1	6	6	6	0	0	0	0	0	0	1	1	0	0	0	0	0	0	0	0	0	0	1	1	0	0	0	0	0	0	0	0	0	0	1	1	0	0	0	0	34.9	34.9
P00918	P00918	4	4	4	Carbonic anhydrase 2	CA2	sp|P00918|CAH2_HUMAN Carbonic anhydrase 2 OS=Homo sapiens OX=9606 GN=CA2 PE=1 SV=2	1	4	4	4	0	1	0	0	0	0	2	2	0	1	0	0	0	1	0	0	0	0	2	2	0	1	0	0	0	1	0	0	0	0	2	2	0	1	0	0	15.4	15.4
P01009	P01009	5	5	5	Alpha-1-antitrypsin;Short peptide from AAT	SERPINA1	sp|P01009|A1AT_HUMAN Alpha-1-antitrypsin OS=Homo sapiens OX=9606 GN=SERPINA1 PE=1 SV=3	1	5	5	5	5	1	5	1	1	0	2	1	0	5	0	3	5	1	5	1	1	0	2	1	0	5	0	3	5	1	5	1	1	0	2	1	0	5	0	3	14.8	14.8
P01023;CON__ENSEMBL:ENSBTAP00000024146;P20742	P01023	17;3;1	17;3;1	17;3;1	Alpha-2-macroglobulin	A2M	sp|P01023|A2MG_HUMAN Alpha-2-macroglobulin OS=Homo sapiens OX=9606 GN=A2M PE=1 SV=3	3	17	17	17	16	2	14	1	0	0	14	2	14	12	0	12	16	2	14	1	0	0	14	2	14	12	0	12	16	2	14	1	0	0	14	2	14	12	0	12	14.1	14.1
P01024;CON__Q2UVX4	P01024	21;2	21;2	21;2	Complement C3;Complement C3 beta chain;C3-beta-c;Complement C3 alpha chain;C3a anaphylatoxin;Acylation stimulating protein;Complement C3b alpha chain;Complement C3c alpha chain fragment 1;Complement C3dg fragment;Complement C3g fragment;Complement C3d fragment;Complement C3f fragment;Complement C3c alpha chain fragment 2	C3	sp|P01024|CO3_HUMAN Complement C3 OS=Homo sapiens OX=9606 GN=C3 PE=1 SV=2	2	21	21	21	15	2	16	3	0	1	10	5	8	11	2	15	15	2	16	3	0	1	10	5	8	11	2	15	15	2	16	3	0	1	10	5	8	11	2	15	15.8	15.8
P01242	P01242	1	1	1	Growth hormone variant	GH2	sp|P01242|SOM2_HUMAN Growth hormone variant OS=Homo sapiens OX=9606 GN=GH2 PE=1 SV=3	1	1	1	1	1	0	1	0	0	0	0	0	0	0	0	0	1	0	1	0	0	0	0	0	0	0	0	0	1	0	1	0	0	0	0	0	0	0	0	0	5.1	5.1
P01834	P01834	2	2	2	Ig kappa chain C region	IGKC	sp|P01834|IGKC_HUMAN Immunoglobulin kappa constant OS=Homo sapiens OX=9606 GN=IGKC PE=1 SV=2	1	2	2	2	2	0	2	0	1	0	1	0	2	2	0	2	2	0	2	0	1	0	1	0	2	2	0	2	2	0	2	0	1	0	1	0	2	2	0	2	34.6	34.6
P01857	P01857	7	3	3	Ig gamma-1 chain C region	IGHG1	sp|P01857|IGHG1_HUMAN Immunoglobulin heavy constant gamma 1 OS=Homo sapiens OX=9606 GN=IGHG1 PE=1 SV=1	1	7	3	3	7	2	6	2	1	0	4	3	4	6	0	5	3	0	2	0	0	0	1	2	1	2	0	3	3	0	2	0	0	0	1	2	1	2	0	3	25.8	13.6
P01859	P01859	5	1	0	Ig gamma-2 chain C region	IGHG2	sp|P01859|IGHG2_HUMAN Immunoglobulin heavy constant gamma 2 OS=Homo sapiens OX=9606 GN=IGHG2 PE=1 SV=2	1	5	1	0	4	2	4	1	2	0	2	0	5	5	0	4	1	1	1	0	1	0	0	0	1	1	0	1	0	0	0	0	0	0	0	0	0	0	0	0	15	4.3
P01860	P01860	9	9	3	Ig gamma-3 chain C region	IGHG3	sp|P01860|IGHG3_HUMAN Immunoglobulin heavy constant gamma 3 OS=Homo sapiens OX=9606 GN=IGHG3 PE=1 SV=2	1	9	9	3	7	3	6	2	1	0	6	3	6	8	0	5	7	3	6	2	1	0	6	3	6	8	0	5	2	1	1	0	0	0	2	2	1	2	0	1	29.4	29.4
P01861	P01861	4	1	1	Ig gamma-4 chain C region	IGHG4	sp|P01861|IGHG4_HUMAN Immunoglobulin heavy constant gamma 4 OS=Homo sapiens OX=9606 GN=IGHG4 PE=1 SV=1	1	4	1	1	3	2	3	2	2	0	3	0	3	4	0	2	0	0	0	1	0	0	1	0	0	1	0	0	0	0	0	1	0	0	1	0	0	1	0	0	14.4	4.3
P01871	P01871	7	7	7	Ig mu chain C region	IGHM	sp|P01871|IGHM_HUMAN Immunoglobulin heavy constant mu OS=Homo sapiens OX=9606 GN=IGHM PE=1 SV=4	1	7	7	7	5	1	5	0	0	0	2	1	7	2	1	4	5	1	5	0	0	0	2	1	7	2	1	4	5	1	5	0	0	0	2	1	7	2	1	4	18.8	18.8
P01876;P01877	P01876	5;2	5;2	5;2	Ig alpha-1 chain C region	IGHA1	sp|P01876|IGHA1_HUMAN Immunoglobulin heavy constant alpha 1 OS=Homo sapiens OX=9606 GN=IGHA1 PE=1 SV=2	2	5	5	5	5	0	5	0	0	0	3	0	3	4	0	4	5	0	5	0	0	0	3	0	3	4	0	4	5	0	5	0	0	0	3	0	3	4	0	4	17.8	17.8
P02042;CON__Q3SX09	P02042	8;1	2;0	2;0	Hemoglobin subunit delta	HBD	sp|P02042|HBD_HUMAN Hemoglobin subunit delta OS=Homo sapiens OX=9606 GN=HBD PE=1 SV=2	2	8	2	2	3	1	3	1	2	1	5	2	2	5	1	3	0	0	0	0	0	0	1	1	1	1	0	0	0	0	0	0	0	0	1	1	1	1	0	0	49.7	17
P02647	P02647	9	9	9	Apolipoprotein A-I;Proapolipoprotein A-I;Truncated apolipoprotein A-I	APOA1	sp|P02647|APOA1_HUMAN Apolipoprotein A-I OS=Homo sapiens OX=9606 GN=APOA1 PE=1 SV=1	1	9	9	9	8	3	8	4	1	1	6	3	5	8	2	6	8	3	8	4	1	1	6	3	5	8	2	6	8	3	8	4	1	1	6	3	5	8	2	6	34.8	34.8
P02671	P02671	11	11	11	Fibrinogen alpha chain;Fibrinopeptide A;Fibrinogen alpha chain	FGA	sp|P02671|FIBA_HUMAN Fibrinogen alpha chain OS=Homo sapiens OX=9606 GN=FGA PE=1 SV=2	1	11	11	11	3	0	3	1	1	1	7	4	4	5	1	3	3	0	3	1	1	1	7	4	4	5	1	3	3	0	3	1	1	1	7	4	4	5	1	3	16.2	16.2
P02675;CON__P02676	P02675	9;3	9;3	9;3	Fibrinogen beta chain;Fibrinopeptide B;Fibrinogen beta chain	FGB	sp|P02675|FIBB_HUMAN Fibrinogen beta chain OS=Homo sapiens OX=9606 GN=FGB PE=1 SV=2	2	9	9	9	8	0	8	0	0	0	6	1	6	5	0	4	8	0	8	0	0	0	6	1	6	5	0	4	8	0	8	0	0	0	6	1	6	5	0	4	24	24
P02679	P02679	7	7	7	Fibrinogen gamma chain	FGG	sp|P02679|FIBG_HUMAN Fibrinogen gamma chain OS=Homo sapiens OX=9606 GN=FGG PE=1 SV=3	1	7	7	7	5	0	5	0	0	0	4	1	5	3	1	4	5	0	5	0	0	0	4	1	5	3	1	4	5	0	5	0	0	0	4	1	5	3	1	4	19.9	19.9
P02763	P02763	5	5	4	Alpha-1-acid glycoprotein 1	ORM1	sp|P02763|A1AG1_HUMAN Alpha-1-acid glycoprotein 1 OS=Homo sapiens OX=9606 GN=ORM1 PE=1 SV=1	1	5	5	4	5	0	5	0	1	0	3	1	1	4	0	3	5	0	5	0	1	0	3	1	1	4	0	3	4	0	4	0	0	0	2	0	0	3	0	2	22.4	22.4
P02765	P02765	1	1	1	Alpha-2-HS-glycoprotein;Alpha-2-HS-glycoprotein chain A;Alpha-2-HS-glycoprotein chain B	AHSG	sp|P02765|FETUA_HUMAN Alpha-2-HS-glycoprotein OS=Homo sapiens OX=9606 GN=AHSG PE=1 SV=2	1	1	1	1	0	0	0	0	0	0	0	1	0	0	0	0	0	0	0	0	0	0	0	1	0	0	0	0	0	0	0	0	0	0	0	1	0	0	0	0	2.7	2.7
P02766	P02766	1	1	1	Transthyretin	TTR	sp|P02766|TTHY_HUMAN Transthyretin OS=Homo sapiens OX=9606 GN=TTR PE=1 SV=1	1	1	1	1	1	0	1	0	0	0	0	0	1	0	0	1	1	0	1	0	0	0	0	0	1	0	0	1	1	0	1	0	0	0	0	0	1	0	0	1	8.8	8.8
P02787;CON__Q2HJF0;CON__Q29443;CON__Q0IIK2	P02787	27;1;1;1	27;1;1;1	27;1;1;1	Serotransferrin	TF	sp|P02787|TRFE_HUMAN Serotransferrin OS=Homo sapiens OX=9606 GN=TF PE=1 SV=3	4	27	27	27	19	3	22	1	1	1	16	7	19	20	0	21	19	3	22	1	1	1	16	7	19	20	0	21	19	3	22	1	1	1	16	7	19	20	0	21	41.5	41.5
P02790	P02790	2	2	2	Hemopexin	HPX	sp|P02790|HEMO_HUMAN Hemopexin OS=Homo sapiens OX=9606 GN=HPX PE=1 SV=2	1	2	2	2	2	0	2	0	0	0	0	0	2	1	0	1	2	0	2	0	0	0	0	0	2	1	0	1	2	0	2	0	0	0	0	0	2	1	0	1	4.3	4.3
P03372	P03372	1	1	1	Estrogen receptor	ESR1	sp|P03372|ESR1_HUMAN Estrogen receptor OS=Homo sapiens OX=9606 GN=ESR1 PE=1 SV=2	1	1	1	1	1	0	0	0	0	0	0	0	0	1	0	0	1	0	0	0	0	0	0	0	0	1	0	0	1	0	0	0	0	0	0	0	0	1	0	0	2.9	2.9
P04003	P04003	1	1	1	C4b-binding protein alpha chain	C4BPA	sp|P04003|C4BPA_HUMAN C4b-binding protein alpha chain OS=Homo sapiens OX=9606 GN=C4BPA PE=1 SV=2	1	1	1	1	0	0	0	0	0	0	0	0	0	0	0	0	0	0	0	0	0	0	0	0	0	0	0	0	0	0	0	0	0	0	0	0	0	0	0	0	1.7	1.7
P04040	P04040	1	1	1	Catalase	CAT	sp|P04040|CATA_HUMAN Catalase OS=Homo sapiens OX=9606 GN=CAT PE=1 SV=3	1	1	1	1	1	0	1	0	0	0	0	0	0	1	0	1	1	0	1	0	0	0	0	0	0	1	0	1	1	0	1	0	0	0	0	0	0	1	0	1	2.5	2.5
P04259	P04259	18	1	1	Keratin, type II cytoskeletal 6B	KRT6B	sp|P04259|K2C6B_HUMAN Keratin, type II cytoskeletal 6B OS=Homo sapiens OX=9606 GN=KRT6B PE=1 SV=5	1	18	1	1	15	4	15	4	2	0	13	5	13	16	3	15	0	0	0	0	0	0	1	0	0	0	0	0	0	0	0	0	0	0	1	0	0	0	0	0	27.7	1.8
P04264;CON__P04264	P04264;CON__P04264	31;30	31;30	20;19	Keratin, type II cytoskeletal 1	KRT1	sp|P04264|K2C1_HUMAN Keratin, type II cytoskeletal 1 OS=Homo sapiens OX=9606 GN=KRT1 PE=1 SV=6;	2	31	31	20	30	7	30	2	3	1	20	12	23	29	5	28	30	7	30	2	3	1	20	12	23	29	5	28	19	3	19	0	2	1	9	7	13	18	4	19	41.9	41.9
P04406	P04406	3	3	3	Glyceraldehyde-3-phosphate dehydrogenase	GAPDH	sp|P04406|G3P_HUMAN Glyceraldehyde-3-phosphate dehydrogenase OS=Homo sapiens OX=9606 GN=GAPDH PE=1 SV=3	1	3	3	3	3	0	3	0	0	0	1	0	2	3	0	2	3	0	3	0	0	0	1	0	2	3	0	2	3	0	3	0	0	0	1	0	2	3	0	2	13.7	13.7
P05109	P05109	1	1	1	Protein S100-A8;Protein S100-A8, N-terminally processed	S100A8	sp|P05109|S10A8_HUMAN Protein S100-A8 OS=Homo sapiens OX=9606 GN=S100A8 PE=1 SV=1	1	1	1	1	1	0	1	0	0	0	1	0	1	1	0	1	1	0	1	0	0	0	1	0	1	1	0	1	1	0	1	0	0	0	1	0	1	1	0	1	11.8	11.8
P05155	P05155	2	2	2	Plasma protease C1 inhibitor	SERPING1	sp|P05155|IC1_HUMAN Plasma protease C1 inhibitor OS=Homo sapiens OX=9606 GN=SERPING1 PE=1 SV=2	1	2	2	2	0	0	0	0	0	0	1	0	0	1	0	0	0	0	0	0	0	0	1	0	0	1	0	0	0	0	0	0	0	0	1	0	0	1	0	0	3.6	3.6
P06702	P06702	1	1	1	Protein S100-A9	S100A9	sp|P06702|S10A9_HUMAN Protein S100-A9 OS=Homo sapiens OX=9606 GN=S100A9 PE=1 SV=1	1	1	1	1	1	0	1	0	0	0	0	0	1	1	0	1	1	0	1	0	0	0	0	0	1	1	0	1	1	0	1	0	0	0	0	0	1	1	0	1	11.4	11.4
P07355;A6NMY6	P07355;A6NMY6	2;1	2;1	2;1	Annexin A2;Putative annexin A2-like protein	ANXA2;ANXA2P2	sp|P07355|ANXA2_HUMAN Annexin A2 OS=Homo sapiens OX=9606 GN=ANXA2 PE=1 SV=2;sp|A6NMY6|AXA2L_HUMAN Putative annexin A2-like protein OS=Homo sapiens OX=9606 GN=ANXA2P2 PE=5 SV=2	2	2	2	2	2	0	2	0	0	0	2	0	0	2	0	2	2	0	2	0	0	0	2	0	0	2	0	2	2	0	2	0	0	0	2	0	0	2	0	2	5.6	5.6
P0DOY3;P0DOY2;P0CG04;P0CF74;B9A064	P0DOY3;P0DOY2;P0CG04;P0CF74;B9A064	2;2;1;1;1	2;2;1;1;1	2;2;1;1;1	Ig lambda-1 chain C regions;Ig lambda-6 chain C region;Immunoglobulin lambda-like polypeptide 5	IGLC1;IGLC6;IGLL5	sp|P0DOY3|IGLC3_HUMAN Immunoglobulin lambda constant 3 OS=Homo sapiens OX=9606 GN=IGLC3 PE=1 SV=1;sp|P0DOY2|IGLC2_HUMAN Immunoglobulin lambda constant 2 OS=Homo sapiens OX=9606 GN=IGLC2 PE=1 SV=1;sp|P0CG04|IGLC1_HUMAN Immunoglobulin lambda constant 1 OS=Ho	5	2	2	2	1	0	1	0	0	0	0	0	2	1	0	2	1	0	1	0	0	0	0	0	2	1	0	2	1	0	1	0	0	0	0	0	2	1	0	2	23.6	23.6
P14923	P14923	4	4	4	Junction plakoglobin	JUP	sp|P14923|PLAK_HUMAN Junction plakoglobin OS=Homo sapiens OX=9606 GN=JUP PE=1 SV=3	1	4	4	4	3	0	3	1	0	0	1	0	0	4	0	4	3	0	3	1	0	0	1	0	0	4	0	4	3	0	3	1	0	0	1	0	0	4	0	4	7.8	7.8
P15924	P15924	6	6	6	Desmoplakin	DSP	sp|P15924|DESP_HUMAN Desmoplakin OS=Homo sapiens OX=9606 GN=DSP PE=1 SV=3	1	6	6	6	5	1	6	1	1	0	5	1	2	6	1	6	5	1	6	1	1	0	5	1	2	6	1	6	5	1	6	1	1	0	5	1	2	6	1	6	2	2
P18858	P18858	1	1	1	DNA ligase 1	LIG1	sp|P18858|DNLI1_HUMAN DNA ligase 1 OS=Homo sapiens OX=9606 GN=LIG1 PE=1 SV=1	1	1	1	1	0	0	0	1	0	1	0	0	0	0	1	0	0	0	0	1	0	1	0	0	0	0	1	0	0	0	0	1	0	1	0	0	0	0	1	0	1.4	1.4
P19652	P19652	4	3	3	Alpha-1-acid glycoprotein 2	ORM2	sp|P19652|A1AG2_HUMAN Alpha-1-acid glycoprotein 2 OS=Homo sapiens OX=9606 GN=ORM2 PE=1 SV=2	1	4	3	3	4	1	3	1	1	1	2	1	3	4	1	4	3	1	2	1	0	1	1	0	2	3	1	3	3	1	2	1	0	1	1	0	2	3	1	3	19.4	15.4
P35326;P35325;P22532;P22531;Q9BYE4;Q96RM1	P35326;P35325;P22532;P22531;Q9BYE4;Q96RM1	2;2;2;2;2;1	2;2;2;2;2;1	2;2;2;2;2;1	Small proline-rich protein 2A;Small proline-rich protein 2B;Small proline-rich protein 2D;Small proline-rich protein 2E;Small proline-rich protein 2G;Small proline-rich protein 2F	SPRR2A;SPRR2B;SPRR2D;SPRR2E;SPRR2G;SPRR2F	sp|P35326|SPR2A_HUMAN Small proline-rich protein 2A OS=Homo sapiens OX=9606 GN=SPRR2A PE=1 SV=1;sp|P35325|SPR2B_HUMAN Small proline-rich protein 2B OS=Homo sapiens OX=9606 GN=SPRR2B PE=2 SV=1;sp|P22532|SPR2D_HUMAN Small proline-rich protein 2D OS=Homo sapi	6	2	2	2	2	0	2	0	0	0	1	1	0	2	0	2	2	0	2	0	0	0	1	1	0	2	0	2	2	0	2	0	0	0	1	1	0	2	0	2	43.1	43.1
Q01432;P23109	Q01432;P23109	1;1	1;1	1;1	AMP deaminase 3;AMP deaminase 1	AMPD3;AMPD1	sp|Q01432|AMPD3_HUMAN AMP deaminase 3 OS=Homo sapiens OX=9606 GN=AMPD3 PE=1 SV=1;sp|P23109|AMPD1_HUMAN AMP deaminase 1 OS=Homo sapiens OX=9606 GN=AMPD1 PE=1 SV=2	2	1	1	1	0	0	0	1	0	0	0	0	0	0	1	0	0	0	0	1	0	0	0	0	0	0	1	0	0	0	0	1	0	0	0	0	0	0	1	0	0.9	0.9
P23469	P23469	1	1	1	Receptor-type tyrosine-protein phosphatase epsilon	PTBaseline	sp|P23469|PTBaseline_HUMAN Receptor-type tyrosine-protein phosphatase epsilon OS=Homo sapiens OX=9606 GN=PTBaseline PE=1 SV=1	1	1	1	1	0	0	0	1	0	0	0	0	0	0	1	0	0	0	0	1	0	0	0	0	0	0	1	0	0	0	0	1	0	0	0	0	0	0	1	0	1.6	1.6
P25311	P25311	1	1	1	Zinc-alpha-2-glycoprotein	AZGP1	sp|P25311|ZA2G_HUMAN Zinc-alpha-2-glycoprotein OS=Homo sapiens OX=9606 GN=AZGP1 PE=1 SV=2	1	1	1	1	1	0	0	0	0	0	1	0	1	0	0	0	1	0	0	0	0	0	1	0	1	0	0	0	1	0	0	0	0	0	1	0	1	0	0	0	3.4	3.4
Q86SG5;P31151	Q86SG5;P31151	1;1	1;1	1;1	Protein S100-A7A;Protein S100-A7	S100A7A;S100A7	sp|Q86SG5|S1A7A_HUMAN Protein S100-A7A OS=Homo sapiens OX=9606 GN=S100A7A PE=1 SV=3;sp|P31151|S10A7_HUMAN Protein S100-A7 OS=Homo sapiens OX=9606 GN=S100A7 PE=1 SV=4	2	1	1	1	1	0	1	0	0	0	0	0	0	1	0	0	1	0	1	0	0	0	0	0	0	1	0	0	1	0	1	0	0	0	0	0	0	1	0	0	11.9	11.9
P35568	P35568	1	1	1	Insulin receptor substrate 1	IRS1	sp|P35568|IRS1_HUMAN Insulin receptor substrate 1 OS=Homo sapiens OX=9606 GN=IRS1 PE=1 SV=1	1	1	1	1	0	0	0	1	1	0	0	0	0	0	0	0	0	0	0	1	1	0	0	0	0	0	0	0	0	0	0	1	1	0	0	0	0	0	0	0	0.8	0.8
P46821	P46821	1	1	1	Microtubule-associated protein 1B;MAP1B heavy chain;MAP1 light chain LC1	MAP1B	sp|P46821|MAP1B_HUMAN Microtubule-associated protein 1B OS=Homo sapiens OX=9606 GN=MAP1B PE=1 SV=2	1	1	1	1	0	0	0	0	0	0	0	0	0	0	0	0	0	0	0	0	0	0	0	0	0	0	0	0	0	0	0	0	0	0	0	0	0	0	0	0	0.5	0.5
P51817	P51817	1	1	1	cAMP-dependent protein kinase catalytic subunit PRKX	PRKX	sp|P51817|PRKX_HUMAN cAMP-dependent protein kinase catalytic subunit PRKX OS=Homo sapiens OX=9606 GN=PRKX PE=1 SV=1	1	1	1	1	0	0	0	0	0	0	0	0	0	1	0	1	0	0	0	0	0	0	0	0	0	1	0	1	0	0	0	0	0	0	0	0	0	1	0	1	4.2	4.2
P63261;P60709;Q6S8J3;A5A3E0;Q562R1;P0CG38;Q9BYX7;P0CG39	P63261;P60709	8;8;3;3;2;2;1;1	8;8;3;3;2;2;1;1	2;2;0;0;0;0;0;0	Actin, cytoplasmic 2;Actin, cytoplasmic 2, N-terminally processed;Actin, cytoplasmic 1;Actin, cytoplasmic 1, N-terminally processed	ACTG1;ACTB	sp|P63261|ACTG_HUMAN Actin, cytoplasmic 2 OS=Homo sapiens OX=9606 GN=ACTG1 PE=1 SV=1;sp|P60709|ACTB_HUMAN Actin, cytoplasmic 1 OS=Homo sapiens OX=9606 GN=ACTB PE=1 SV=1	8	8	8	2	4	1	6	1	1	0	6	2	7	6	0	4	4	1	6	1	1	0	6	2	7	6	0	4	1	0	1	0	0	0	2	0	2	2	0	1	24.5	24.5
P61626	P61626	1	1	1	Lysozyme C	LYZ	sp|P61626|LYSC_HUMAN Lysozyme C OS=Homo sapiens OX=9606 GN=LYZ PE=1 SV=1	1	1	1	1	1	0	1	0	0	0	0	0	0	1	0	1	1	0	1	0	0	0	0	0	0	1	0	1	1	0	1	0	0	0	0	0	0	1	0	1	8.1	8.1
P62913	P62913	1	1	1	60S ribosomal protein L11	RPL11	sp|P62913|RL11_HUMAN 60S ribosomal protein L11 OS=Homo sapiens OX=9606 GN=RPL11 PE=1 SV=2	1	1	1	1	0	0	0	0	0	0	1	0	0	0	0	0	0	0	0	0	0	0	1	0	0	0	0	0	0	0	0	0	0	0	1	0	0	0	0	0	7.3	7.3
P68104;Q5VTE0;Q05639	P68104;Q5VTE0;Q05639	2;2;1	2;2;1	2;2;1	Elongation factor 1-alpha 1;Putative elongation factor 1-alpha-like 3;Elongation factor 1-alpha 2	EEF1A1;EEF1A1P5;EEF1A2	sp|P68104|EF1A1_HUMAN Elongation factor 1-alpha 1 OS=Homo sapiens OX=9606 GN=EEF1A1 PE=1 SV=1;sp|Q5VTE0|EF1A3_HUMAN Putative elongation factor 1-alpha-like 3 OS=Homo sapiens OX=9606 GN=EEF1A1P5 PE=5 SV=1;sp|Q05639|EF1A2_HUMAN Elongation factor 1-alpha 2 OS	3	2	2	2	1	0	1	0	0	0	1	1	1	2	0	2	1	0	1	0	0	0	1	1	1	2	0	2	1	0	1	0	0	0	1	1	1	2	0	2	5	5
P68871	P68871	10	10	4	Hemoglobin subunit beta;LVV-hemorphin-7;Spinorphin	HBB	sp|P68871|HBB_HUMAN Hemoglobin subunit beta OS=Homo sapiens OX=9606 GN=HBB PE=1 SV=2	1	10	10	4	6	1	6	1	2	1	6	3	4	7	1	5	6	1	6	1	2	1	6	3	4	7	1	5	3	0	3	0	0	0	2	2	3	3	0	2	71.4	71.4
P69905	P69905	6	6	2	Hemoglobin subunit alpha	HBA1	sp|P69905|HBA_HUMAN Hemoglobin subunit alpha OS=Homo sapiens OX=9606 GN=HBA1 PE=1 SV=2	1	6	6	2	5	1	6	1	1	1	5	2	3	3	2	3	5	1	6	1	1	1	5	2	3	3	2	3	2	0	2	0	0	0	2	0	1	2	0	1	42.3	42.3
P78364	P78364	1	1	1	Polyhomeotic-like protein 1	PHC1	sp|P78364|PHC1_HUMAN Polyhomeotic-like protein 1 OS=Homo sapiens OX=9606 GN=PHC1 PE=1 SV=3	1	1	1	1	0	0	0	0	0	0	0	0	0	0	0	0	0	0	0	0	0	0	0	0	0	0	0	0	0	0	0	0	0	0	0	0	0	0	0	0	1.1	1.1
P78509	P78509	1	1	1	Reelin	RELN	sp|P78509|RELN_HUMAN Reelin OS=Homo sapiens OX=9606 GN=RELN PE=1 SV=3	1	1	1	1	0	1	0	0	0	0	0	0	0	0	0	0	0	1	0	0	0	0	0	0	0	0	0	0	0	1	0	0	0	0	0	0	0	0	0	0	0.5	0.5
P81605	P81605	4	4	4	Dermcidin;Survival-promoting peptide;DCD-1	DCD	sp|P81605|DCD_HUMAN Dermcidin OS=Homo sapiens OX=9606 GN=DCD PE=1 SV=2	1	4	4	4	3	0	4	0	1	0	1	0	2	3	0	3	3	0	4	0	1	0	1	0	2	3	0	3	3	0	4	0	1	0	1	0	2	3	0	3	29.1	29.1
Q02413	Q02413	5	5	4	Desmoglein-1	DSG1	sp|Q02413|DSG1_HUMAN Desmoglein-1 OS=Homo sapiens OX=9606 GN=DSG1 PE=1 SV=2	1	5	5	4	3	0	3	1	1	0	3	2	0	4	0	4	3	0	3	1	1	0	3	2	0	4	0	4	3	0	3	1	1	0	3	2	0	4	0	4	6	6
Q08043	Q08043	1	1	1	Alpha-actinin-3	ACTN3	sp|Q08043|ACTN3_HUMAN Alpha-actinin-3 OS=Homo sapiens OX=9606 GN=ACTN3 PE=1 SV=2	1	1	1	1	0	0	0	0	0	0	0	0	1	0	0	0	0	0	0	0	0	0	0	0	1	0	0	0	0	0	0	0	0	0	0	0	1	0	0	0	1.2	1.2
Q08554	Q08554	1	1	1	Desmocollin-1	DSC1	sp|Q08554|DSC1_HUMAN Desmocollin-1 OS=Homo sapiens OX=9606 GN=DSC1 PE=1 SV=2	1	1	1	1	1	0	1	0	0	0	0	0	0	1	0	1	1	0	1	0	0	0	0	0	0	1	0	1	1	0	1	0	0	0	0	0	0	1	0	1	1.7	1.7
Q0VDD8	Q0VDD8	1	1	1	Dynein heavy chain 14, axonemal	DNAH14	sp|Q0VDD8|DYH14_HUMAN Dynein heavy chain 14, axonemal OS=Homo sapiens OX=9606 GN=DNAH14 PE=2 SV=3	1	1	1	1	0	0	0	0	0	0	0	0	0	0	0	0	0	0	0	0	0	0	0	0	0	0	0	0	0	0	0	0	0	0	0	0	0	0	0	0	0.3	0.3
Q13426	Q13426	1	1	1	DNA repair protein XRCC4	XRCC4	sp|Q13426|XRCC4_HUMAN DNA repair protein XRCC4 OS=Homo sapiens OX=9606 GN=XRCC4 PE=1 SV=2	1	1	1	1	0	1	0	0	0	0	0	0	0	0	0	0	0	1	0	0	0	0	0	0	0	0	0	0	0	1	0	0	0	0	0	0	0	0	0	0	4.5	4.5
Q147U7	Q147U7	1	1	1	Single-pass membrane and coiled-coil domain-containing protein 1	SMCO1	sp|Q147U7|SMCO1_HUMAN Single-pass membrane and coiled-coil domain-containing protein 1 OS=Homo sapiens OX=9606 GN=SMCO1 PE=2 SV=2	1	1	1	1	0	1	0	1	1	0	0	0	0	0	0	0	0	1	0	1	1	0	0	0	0	0	0	0	0	1	0	1	1	0	0	0	0	0	0	0	4.7	4.7
Q14D04	Q14D04	1	1	1	Ventricular zone-exBaselinessed PH domain-containing protein homolog 1	VEPH1	sp|Q14D04|MELT_HUMAN Ventricular zone-exBaselinessed PH domain-containing protein homolog 1 OS=Homo sapiens OX=9606 GN=VEPH1 PE=1 SV=1	1	1	1	1	0	0	0	0	0	1	0	0	0	0	0	0	0	0	0	0	0	1	0	0	0	0	0	0	0	0	0	0	0	1	0	0	0	0	0	0	1.3	1.3
Q15057	Q15057	1	1	1	Arf-GAP with coiled-coil, ANK repeat and PH domain-containing protein 2	ACAP2	sp|Q15057|ACAP2_HUMAN Arf-GAP with coiled-coil, ANK repeat and PH domain-containing protein 2 OS=Homo sapiens OX=9606 GN=ACAP2 PE=1 SV=3	1	1	1	1	0	0	0	0	0	0	0	0	0	0	0	0	0	0	0	0	0	0	0	0	0	0	0	0	0	0	0	0	0	0	0	0	0	0	0	0	1.8	1.8
Q15468	Q15468	1	1	1	SCL-interrupting locus protein	STIL	sp|Q15468|STIL_HUMAN SCL-interrupting locus protein OS=Homo sapiens OX=9606 GN=STIL PE=1 SV=2	1	1	1	1	0	0	0	0	0	0	0	0	1	1	0	1	0	0	0	0	0	0	0	0	1	1	0	1	0	0	0	0	0	0	0	0	1	1	0	1	0.8	0.8
Q4FZB7	Q4FZB7	1	1	1	Histone-lysine N-methyltransferase SUV420H1	SUV420H1	sp|Q4FZB7|KMT5B_HUMAN Histone-lysine N-methyltransferase KMT5B OS=Homo sapiens OX=9606 GN=KMT5B PE=1 SV=4	1	1	1	1	0	0	0	0	0	0	0	0	0	0	0	0	0	0	0	0	0	0	0	0	0	0	0	0	0	0	0	0	0	0	0	0	0	0	0	0	0.9	0.9
Q53R41	Q53R41	1	1	1	FAST kinase domain-containing protein 1	FASTKD1	sp|Q53R41|FAKD1_HUMAN FAST kinase domain-containing protein 1, mitochondrial OS=Homo sapiens OX=9606 GN=FASTKD1 PE=1 SV=1	1	1	1	1	0	0	0	1	1	1	0	0	0	0	0	0	0	0	0	1	1	1	0	0	0	0	0	0	0	0	0	1	1	1	0	0	0	0	0	0	1.7	1.7
Q5T749	Q5T749	6	6	6	Keratinocyte proline-rich protein	KPRP	sp|Q5T749|KPRP_HUMAN Keratinocyte proline-rich protein OS=Homo sapiens OX=9606 GN=KPRP PE=1 SV=1	1	6	6	6	5	1	5	1	1	1	5	2	3	6	1	6	5	1	5	1	1	1	5	2	3	6	1	6	5	1	5	1	1	1	5	2	3	6	1	6	10.4	10.4
Q5T7V8	Q5T7V8	1	1	1	RAB6-interacting golgin	GORAB	sp|Q5T7V8|GORAB_HUMAN RAB6-interacting golgin OS=Homo sapiens OX=9606 GN=GORAB PE=1 SV=1	1	1	1	1	0	1	0	0	0	0	0	0	0	0	1	0	0	1	0	0	0	0	0	0	0	0	1	0	0	1	0	0	0	0	0	0	0	0	1	0	1.8	1.8
Q5T848	Q5T848	1	1	1	Probable G-protein coupled receptor 158	GPR158	sp|Q5T848|GP158_HUMAN Probable G-protein coupled receptor 158 OS=Homo sapiens OX=9606 GN=GPR158 PE=1 SV=1	1	1	1	1	0	1	0	0	0	0	0	0	0	0	0	0	0	1	0	0	0	0	0	0	0	0	0	0	0	1	0	0	0	0	0	0	0	0	0	0	0.8	0.8
Q5TYW1	Q5TYW1	1	1	1	Zinc finger protein 658	ZNF658	sp|Q5TYW1|ZN658_HUMAN Zinc finger protein 658 OS=Homo sapiens OX=9606 GN=ZNF658 PE=1 SV=2	1	1	1	1	0	0	0	0	1	1	0	0	0	0	0	0	0	0	0	0	1	1	0	0	0	0	0	0	0	0	0	0	1	1	0	0	0	0	0	0	1.5	1.5
Q6P582;Q6NZ67	Q6P582;Q6NZ67	1;1	1;1	1;1	Mitotic-spindle organizing protein 2A;Mitotic-spindle organizing protein 2B	MZT2A;MZT2B	sp|Q6P582|MZT2A_HUMAN Mitotic-spindle organizing protein 2A OS=Homo sapiens OX=9606 GN=MZT2A PE=1 SV=2;sp|Q6NZ67|MZT2B_HUMAN Mitotic-spindle organizing protein 2B OS=Homo sapiens OX=9606 GN=MZT2B PE=1 SV=1	2	1	1	1	0	0	1	0	0	0	0	0	0	1	0	0	0	0	1	0	0	0	0	0	0	1	0	0	0	0	1	0	0	0	0	0	0	1	0	0	8.2	8.2
Q6P4Q7	Q6P4Q7	1	1	1	Metal transporter CNNM4	CNNM4	sp|Q6P4Q7|CNNM4_HUMAN Metal transporter CNNM4 OS=Homo sapiens OX=9606 GN=CNNM4 PE=1 SV=3	1	1	1	1	0	0	0	0	1	0	0	0	0	0	0	0	0	0	0	0	1	0	0	0	0	0	0	0	0	0	0	0	1	0	0	0	0	0	0	0	1.9	1.9
Q6PJG2	Q6PJG2	1	1	1	ELM2 and SANT domain-containing protein 1	ELMSAN1	sp|Q6PJG2|EMSA1_HUMAN ELM2 and SANT domain-containing protein 1 OS=Homo sapiens OX=9606 GN=ELMSAN1 PE=1 SV=2	1	1	1	1	0	0	0	0	0	0	0	0	0	0	0	0	0	0	0	0	0	0	0	0	0	0	0	0	0	0	0	0	0	0	0	0	0	0	0	0	1.2	1.2
Q6ZU35	Q6ZU35	1	1	1	Uncharacterized protein KIAA1211	KIAA1211	sp|Q6ZU35|K1211_HUMAN Uncharacterized protein KIAA1211 OS=Homo sapiens OX=9606 GN=KIAA1211 PE=1 SV=3	1	1	1	1	0	0	0	0	0	0	0	0	1	0	0	0	0	0	0	0	0	0	0	0	1	0	0	0	0	0	0	0	0	0	0	0	1	0	0	0	0.9	0.9
Q71F23	Q71F23	1	1	1	Centromere protein U	CENPU	sp|Q71F23|CENPU_HUMAN Centromere protein U OS=Homo sapiens OX=9606 GN=CENPU PE=1 SV=1	1	1	1	1	0	0	0	0	0	0	0	0	0	0	0	1	0	0	0	0	0	0	0	0	0	0	0	1	0	0	0	0	0	0	0	0	0	0	0	1	4.1	4.1
Q7L4P6	Q7L4P6	1	1	1	BEN domain-containing protein 5	BEND5	sp|Q7L4P6|BEND5_HUMAN BEN domain-containing protein 5 OS=Homo sapiens OX=9606 GN=BEND5 PE=1 SV=1	1	1	1	1	0	0	0	0	0	0	0	1	0	0	0	0	0	0	0	0	0	0	0	1	0	0	0	0	0	0	0	0	0	0	0	1	0	0	0	0	2.6	2.6
Q7L576	Q7L576	1	1	1	Cytoplasmic FMR1-interacting protein 1	CYFIP1	sp|Q7L576|CYFP1_HUMAN Cytoplasmic FMR1-interacting protein 1 OS=Homo sapiens OX=9606 GN=CYFIP1 PE=1 SV=1	1	1	1	1	0	0	0	1	0	0	0	0	0	0	1	0	0	0	0	1	0	0	0	0	0	0	1	0	0	0	0	1	0	0	0	0	0	0	1	0	1	1
Q7Z404	Q7Z404	1	1	1	Transmembrane channel-like protein 4	TMC4	sp|Q7Z404|TMC4_HUMAN Transmembrane channel-like protein 4 OS=Homo sapiens OX=9606 GN=TMC4 PE=2 SV=3	1	1	1	1	0	0	1	0	0	0	0	0	0	0	0	0	0	0	1	0	0	0	0	0	0	0	0	0	0	0	1	0	0	0	0	0	0	0	0	0	1.4	1.4
Q7Z6M4	Q7Z6M4	1	1	1	Transcription termination factor 4, mitochondrial;mTERF domain-containing protein 2 processed	MTERF4	sp|Q7Z6M4|MTEF4_HUMAN Transcription termination factor 4, mitochondrial OS=Homo sapiens OX=9606 GN=MTERF4 PE=1 SV=3	1	1	1	1	0	0	0	0	0	1	0	0	0	0	0	0	0	0	0	0	0	1	0	0	0	0	0	0	0	0	0	0	0	1	0	0	0	0	0	0	3.7	3.7
Q86SQ0	Q86SQ0	1	1	1	Pleckstrin homology-like domain family B member 2	PHLDB2	sp|Q86SQ0|PHLB2_HUMAN Pleckstrin homology-like domain family B member 2 OS=Homo sapiens OX=9606 GN=PHLDB2 PE=1 SV=2	1	1	1	1	0	0	0	0	0	0	1	0	1	0	0	0	0	0	0	0	0	0	1	0	1	0	0	0	0	0	0	0	0	0	1	0	1	0	0	0	0.8	0.8
Q8IZF3	Q8IZF3	1	1	1	Probable G-protein coupled receptor 115	GPR115	sp|Q8IZF3|AGRF4_HUMAN Adhesion G protein-coupled receptor F4 OS=Homo sapiens OX=9606 GN=ADGRF4 PE=2 SV=3	1	1	1	1	0	0	0	0	0	0	1	0	0	1	0	0	0	0	0	0	0	0	1	0	0	1	0	0	0	0	0	0	0	0	1	0	0	1	0	0	1.6	1.6
Q8IZT6	Q8IZT6	2	2	1	Abnormal spindle-like microcephaly-associated protein	ASPM	sp|Q8IZT6|ASPM_HUMAN Abnormal spindle-like microcephaly-associated protein OS=Homo sapiens OX=9606 GN=ASPM PE=1 SV=2	1	2	2	1	0	1	0	0	0	1	0	0	0	0	0	0	0	1	0	0	0	1	0	0	0	0	0	0	0	1	0	0	0	1	0	0	0	0	0	0	0.8	0.8
Q8N2N9;Q5JPF3;A6QL64	Q8N2N9;Q5JPF3;A6QL64	2;1;1	2;1;1	2;1;1	Ankyrin repeat domain-containing protein 36B;Ankyrin repeat domain-containing protein 36C;Ankyrin repeat domain-containing protein 36A	ANKRD36B;ANKRD36C;ANKRD36	sp|Q8N2N9|AN36B_HUMAN Ankyrin repeat domain-containing protein 36B OS=Homo sapiens OX=9606 GN=ANKRD36B PE=1 SV=4;sp|Q5JPF3|AN36C_HUMAN Ankyrin repeat domain-containing protein 36C OS=Homo sapiens OX=9606 GN=ANKRD36C PE=1 SV=3;sp|A6QL64|AN36A_HUMAN Ankyrin	3	2	2	2	0	0	0	1	0	1	0	0	0	0	0	0	0	0	0	1	0	1	0	0	0	0	0	0	0	0	0	1	0	1	0	0	0	0	0	0	2.5	2.5
Q8NBF2	Q8NBF2	1	1	1	NHL repeat-containing protein 2	NHLRC2	sp|Q8NBF2|NHLC2_HUMAN NHL repeat-containing protein 2 OS=Homo sapiens OX=9606 GN=NHLRC2 PE=1 SV=1	1	1	1	1	0	1	0	1	0	1	0	0	0	0	1	0	0	1	0	1	0	1	0	0	0	0	1	0	0	1	0	1	0	1	0	0	0	0	1	0	2.1	2.1
Q8NDZ4	Q8NDZ4	1	1	1	Deleted in autism protein 1	C3orf58	sp|Q8NDZ4|DIA1_HUMAN Deleted in autism protein 1 OS=Homo sapiens OX=9606 GN=C3orf58 PE=1 SV=1	1	1	1	1	0	0	0	0	0	0	0	0	1	0	0	0	0	0	0	0	0	0	0	0	1	0	0	0	0	0	0	0	0	0	0	0	1	0	0	0	2.6	2.6
Q8NEZ3	Q8NEZ3	1	1	1	WD repeat-containing protein 19	WDR19	sp|Q8NEZ3|WDR19_HUMAN WD repeat-containing protein 19 OS=Homo sapiens OX=9606 GN=WDR19 PE=1 SV=2	1	1	1	1	0	0	0	0	0	0	0	0	0	0	0	0	0	0	0	0	0	0	0	0	0	0	0	0	0	0	0	0	0	0	0	0	0	0	0	0	1.1	1.1
Q8TD57	Q8TD57	1	1	1	Dynein heavy chain 3, axonemal	DNAH3	sp|Q8TD57|DYH3_HUMAN Dynein heavy chain 3, axonemal OS=Homo sapiens OX=9606 GN=DNAH3 PE=2 SV=1	1	1	1	1	0	0	0	0	0	0	0	0	0	0	0	0	0	0	0	0	0	0	0	0	0	0	0	0	0	0	0	0	0	0	0	0	0	0	0	0	0.2	0.2
Q8WWB5	Q8WWB5	1	1	1	PIH1 domain-containing protein 2	PIH1D2	sp|Q8WWB5|PIHD2_HUMAN PIH1 domain-containing protein 2 OS=Homo sapiens OX=9606 GN=PIH1D2 PE=1 SV=1	1	1	1	1	0	0	0	0	0	1	0	0	0	0	0	0	0	0	0	0	0	1	0	0	0	0	0	0	0	0	0	0	0	1	0	0	0	0	0	0	2.2	2.2
Q96BY6	Q96BY6	1	1	1	Dedicator of cytokinesis protein 10	DOCK10	sp|Q96BY6|DOC10_HUMAN Dedicator of cytokinesis protein 10 OS=Homo sapiens OX=9606 GN=DOCK10 PE=1 SV=3	1	1	1	1	0	0	0	0	0	0	0	0	0	1	0	0	0	0	0	0	0	0	0	0	0	1	0	0	0	0	0	0	0	0	0	0	0	1	0	0	0.5	0.5
Q96N67;Q96HP0	Q96N67;Q96HP0	2;1	2;1	1;0	Dedicator of cytokinesis protein 7;Dedicator of cytokinesis protein 6	DOCK7;DOCK6	sp|Q96N67|DOCK7_HUMAN Dedicator of cytokinesis protein 7 OS=Homo sapiens OX=9606 GN=DOCK7 PE=1 SV=4;sp|Q96HP0|DOCK6_HUMAN Dedicator of cytokinesis protein 6 OS=Homo sapiens OX=9606 GN=DOCK6 PE=1 SV=3	2	2	2	1	0	0	0	0	0	0	0	0	1	1	0	1	0	0	0	0	0	0	0	0	1	1	0	1	0	0	0	0	0	0	0	0	1	1	0	1	0.9	0.9
Q96Q07	Q96Q07	1	1	1	BTB/POZ domain-containing protein 9	BTBD9	sp|Q96Q07|BTBD9_HUMAN BTB/POZ domain-containing protein 9 OS=Homo sapiens OX=9606 GN=BTBD9 PE=1 SV=2	1	1	1	1	0	0	0	0	0	0	0	0	0	0	0	0	0	0	0	0	0	0	0	0	0	0	0	0	0	0	0	0	0	0	0	0	0	0	0	0	1.8	1.8
Q96SN8	Q96SN8	1	1	1	CDK5 regulatory subunit-associated protein 2	CDK5RAP2	sp|Q96SN8|CK5P2_HUMAN CDK5 regulatory subunit-associated protein 2 OS=Homo sapiens OX=9606 GN=CDK5RAP2 PE=1 SV=5	1	1	1	1	0	0	0	0	0	0	0	0	0	0	0	0	0	0	0	0	0	0	0	0	0	0	0	0	0	0	0	0	0	0	0	0	0	0	0	0	0.5	0.5
Q9BXL7	Q9BXL7	1	1	1	Caspase recruitment domain-containing protein 11	CARD11	sp|Q9BXL7|CAR11_HUMAN Caspase recruitment domain-containing protein 11 OS=Homo sapiens OX=9606 GN=CARD11 PE=1 SV=3	1	1	1	1	0	0	0	1	1	1	0	0	0	1	1	0	0	0	0	1	1	1	0	0	0	1	1	0	0	0	0	1	1	1	0	0	0	1	1	0	1	1
Q9BZF1	Q9BZF1	1	1	1	Oxysterol-binding protein-related protein 8	OSBPL8	sp|Q9BZF1|OSBL8_HUMAN Oxysterol-binding protein-related protein 8 OS=Homo sapiens OX=9606 GN=OSBPL8 PE=1 SV=3	1	1	1	1	1	1	1	0	0	0	0	0	0	0	0	0	1	1	1	0	0	0	0	0	0	0	0	0	1	1	1	0	0	0	0	0	0	0	0	0	0.8	0.8
Q9H361	Q9H361	2	2	2	Polyadenylate-binding protein 3	PABPC3	sp|Q9H361|PABP3_HUMAN Polyadenylate-binding protein 3 OS=Homo sapiens OX=9606 GN=PABPC3 PE=1 SV=2	1	2	2	2	0	0	1	0	1	0	0	0	0	0	0	0	0	0	1	0	1	0	0	0	0	0	0	0	0	0	1	0	1	0	0	0	0	0	0	0	3.2	3.2
Q9NWH9	Q9NWH9	1	1	1	SAFB-like transcription modulator	SLTM	sp|Q9NWH9|SLTM_HUMAN SAFB-like transcription modulator OS=Homo sapiens OX=9606 GN=SLTM PE=1 SV=2	1	1	1	1	0	0	0	0	0	0	0	1	0	0	0	0	0	0	0	0	0	0	0	1	0	0	0	0	0	0	0	0	0	0	0	1	0	0	0	0	1	1
Q9NXL2	Q9NXL2	1	1	1	Rho guanine nucleotide exchange factor 38	ARHGEF38	sp|Q9NXL2|ARH38_HUMAN Rho guanine nucleotide exchange factor 38 OS=Homo sapiens OX=9606 GN=ARHGEF38 PE=2 SV=2	1	1	1	1	0	0	0	1	0	0	0	0	0	0	1	0	0	0	0	1	0	0	0	0	0	0	1	0	0	0	0	1	0	0	0	0	0	0	1	0	1.4	1.4
Q9P0L2	Q9P0L2	1	1	1	Serine/threonine-protein kinase MARK1	MARK1	sp|Q9P0L2|MARK1_HUMAN Serine/threonine-protein kinase MARK1 OS=Homo sapiens OX=9606 GN=MARK1 PE=1 SV=2	1	1	1	1	1	0	1	0	0	0	0	0	0	0	0	0	1	0	1	0	0	0	0	0	0	0	0	0	1	0	1	0	0	0	0	0	0	0	0	0	1.3	1.3
Q9UBC3	Q9UBC3	1	1	1	DNA (cytosine-5)-methyltransferase 3B	DNMT3B	sp|Q9UBC3|DNM3B_HUMAN DNA (cytosine-5)-methyltransferase 3B OS=Homo sapiens OX=9606 GN=DNMT3B PE=1 SV=1	1	1	1	1	0	0	0	0	0	0	0	0	0	0	0	0	0	0	0	0	0	0	0	0	0	0	0	0	0	0	0	0	0	0	0	0	0	0	0	0	1.4	1.4
Q9UKN7	Q9UKN7	1	1	1	Unconventional myosin-XV	MYO15A	sp|Q9UKN7|MYO15_HUMAN Unconventional myosin-XV OS=Homo sapiens OX=9606 GN=MYO15A PE=1 SV=2	1	1	1	1	0	0	1	0	0	0	1	0	0	0	0	1	0	0	1	0	0	0	1	0	0	0	0	1	0	0	1	0	0	0	1	0	0	0	0	1	0.2	0.2
Q9Y232	Q9Y232	1	1	1	Chromodomain Y-like protein	CDYL	sp|Q9Y232|CDYL_HUMAN Chromodomain Y-like protein OS=Homo sapiens OX=9606 GN=CDYL PE=1 SV=2	1	1	1	1	0	0	0	0	0	0	0	0	1	0	0	0	0	0	0	0	0	0	0	0	1	0	0	0	0	0	0	0	0	0	0	0	1	0	0	0	1.7	1.7
Q9Y639	Q9Y639	1	1	1	Neuroplastin	NPTN	sp|Q9Y639|NPTN_HUMAN Neuroplastin OS=Homo sapiens OX=9606 GN=NPTN PE=1 SV=2	1	1	1	1	1	0	1	0	0	0	0	0	0	1	0	0	1	0	1	0	0	0	0	0	0	1	0	0	1	0	1	0	0	0	0	0	0	1	0	0	3.5	3.5
REV__O14717	REV__O14717	1	1	1			sp|O14717|TRDMT_HUMAN tRNA (cytosine(38)-C(5))-methyltransferase OS=Homo sapiens OX=9606 GN=TRDMT1 PE=1 SV=1	1	1	1	1	0	0	0	0	0	0	0	0	0	0	0	0	0	0	0	0	0	0	0	0	0	0	0	0	0	0	0	0	0	0	0	0	0	0	0	0	0	0
REV__Q8N7A1	REV__Q8N7A1	1	1	1			sp|Q8N7A1|KLDC1_HUMAN Kelch domain-containing protein 1 OS=Homo sapiens OX=9606 GN=KLHDC1 PE=2 SV=2	1	1	1	1	0	1	0	0	0	0	0	0	0	0	0	0	0	1	0	0	0	0	0	0	0	0	0	0	0	1	0	0	0	0	0	0	0	0	0	0	0	0
REV__Q9UBC3	REV__Q9UBC3	1	1	1			sp|Q9UBC3|DNM3B_HUMAN DNA (cytosine-5)-methyltransferase 3B OS=Homo sapiens OX=9606 GN=DNMT3B PE=1 SV=1	1	1	1	1	0	0	0	0	0	0	1	0	0	0	0	0	0	0	0	0	0	0	1	0	0	0	0	0	0	0	0	0	0	0	1	0	0	0	0	0	0	0
[truncated: 97 more columns]

## Sheet: quantification
Protein IDs	Gene names	Description	iBAQ NRP A	iBAQ NRP B	iBAQ NRP C	iBAQ RP A	iBAQ RP B	iBAQ RP C	iBAQ NRB A	iBAQ NRB B	iBAQ NRB C	iBAQ RB A	iBAQ RB B	iBAQ RB C	Peptides	Mol. weight [kDa]	Score	MS/MS count	Deamidation (NQ) site IDs	Oxidation (M) site IDs	Deamidation (NQ) site positions	Oxidation (M) site positions
A2NJV5	IGKV A18	Ig kappa chain V-II region RPMI 6410	5108.3	0	5278.1	0	0	0	10348	2750.8	13703	4510.5	0	5190.8	1	13.085	6.3857	1
A0A0B4J2B5	IGHV3OR16-9		11619	0	17791	0	0	0	3465.1	0	0	3778.2	0	4783.9	1	10.657	77.027	8
P0DP03	IGHV3-23	Ig heavy chain V-III region CAM	4849.2	1858.3	3170	0	0	0	13011	1284.7	15010	4043.4	0	3906.3	2	12.947	12.969	9
O43933	PEX1	Peroxisome biogenesis factor 1	0	0	0	23036	22156	24253	0	0	0	0	62281	0	1	142.87	7.5411	5
P00738	HP	Haptoglobin	29296	7256.9	34909	12568	0	0	43911	13694	53963	26825	0	31427	11	45.205	84.639	46
P00915	CA1	Carbonic anhydrase 1	0	0	0	0	0	0	1256.9	4605.5	0	0	0	0	6	28.87	36.377	9	37		25
P00918	CA2	Carbonic anhydrase 2	0	359.24	0	0	0	0	3007.2	3464.9	0	510.52	0	0	4	29.246	23.093	5
P01009	SERPINA1	Alpha-1-antitrypsin	9605	3375.6	14176	1125	1445.6	0	5598.7	672.48	0	4476.6	0	10008	5	46.736	64.176	21	38		338
P01023	A2M	Alpha-2-macroglobulin	9901.2	876.35	9603.3	1241.2	0	0	17552	459.86	19308	5133	0	5328.9	17	163.29	121.9	104	39		851
P01024	C3	Complement C3	3651.8	263.1	4219.1	784.84	0	145.47	3640.7	1870.4	3703.4	2805.9	337.54	4107.3	21	187.15	178.52	97
P01834	IGKC	Ig kappa chain C region	61901	0	70678	0	1364.3	0	50584	0	187180	53808	0	55839	2	11.765	14.622	31
P01857	IGHG1	Ig gamma-1 chain C region	29241	0	30327	0	0	0	1255	2082.7	3420.8	23054	0	28250	7	36.105	23.024	27
P01859	IGHG2	Ig gamma-2 chain C region	17338	1708.6	22422	0	2433.4	0	0	0	4937.5	18328	0	18514	5	35.9	8.2332	10
P01860	IGHG3	Ig gamma-3 chain C region	61045	30026	68471	48983	27428	0	259120	65566	257660	65617	0	42403	9	41.287	61.073	74
P01871	IGHM	Ig mu chain C region	9461.6	1825.1	10107	0	0	0	8910	398.01	34977	4406.5	1398.9	7012	7	49.439	61.471	32
P01876	IGHA1	Ig alpha-1 chain C region	23710	0	25264	0	0	0	37402	0	40075	20694	0	21529	5	37.654	40.558	33
P02042	HBD	Hemoglobin subunit delta	0	0	0	0	0	0	1736.9	1228.6	2306.5	468.56	0	0	8	16.055	16.143	8	41		140
P02647	APOA1	Apolipoprotein A-I	30624	8022.3	33226	17305	6727.1	0	22311	8573.3	14688	21269	2827.2	16926	9	30.777	68.452	77	42		208
P02671	FGA	Fibrinogen alpha chain	1161.4	0	1802.1	756.82	1078.7	1014.4	9298.6	7503.7	8111.5	1757.2	253.19	1142.7	11	94.972	70.305	34
P02675	FGB	Fibrinogen beta chain	7801.1	0	8373.7	0	0	0	14946	905.36	18053	3133.1	0	2969.7	9	55.928	71.715	32
P02679	FGG	Fibrinogen gamma chain	4708.3	0	5552.8	0	0	0	7416.6	2066.7	13443	2269.1	273.33	3915.5	7	51.511	55.886	21
P02763	ORM1	Alpha-1-acid glycoprotein 1	85542	0	101410	0	32335	0	39384	11767	12052	51907	0	50885	5	23.511	30.776	20
P02766	TTR	Transthyretin	5731.5	0	5779.9	0	0	0	0	0	7236.3	0	0	3733	1	15.887	6.4299	2
P02787	TF	Serotransferrin	36355	1587	47720	294.58	753.08	1310.3	90527	25103	135560	28837	0	38896	27	77.063	294.42	233		15		128
P02790	HPX	Hemopexin	6886.9	0	7402.5	0	0	0	0	0	20440	3878.4	0	4346.8	2	51.676	12.007	9
P04040	CAT	Catalase	470.08	0	355.54	0	0	0	0	0	0	317.48	0	383.77	1	59.755	8.5552	1
P04406	GAPDH	Glyceraldehyde-3-phosphate dehydrogenase	6373.7	0	8635.1	0	0	0	1817.1	0	4069.9	4569.7	0	5292.4	3	36.053	17.988	3
P05109	S100A8	Protein S100-A8	39514	0	48067	0	0	0	10396	0	10939	17039	0	18457	1	10.834	7.6472	8
P06702	S100A9	Protein S100-A9	11187	0	12594	0	0	0	0	0	3344.9	5822.4	0	6224.2	1	13.242	6.5509	6
P07355	ANXA2	Annexin A2	2443.3	0	2935.3	0	0	0	1821	0	0	2862.5	0	3289.6	2	38.604	12.423	5
P0DOY3	IGLC1	Ig lambda-1 chain C regions	13924	0	19564	0	0	0	0	0	59776	13350	0	17486	2	11.265	12.896	13
P14923	JUP	Junction plakoglobin	1151	0	1168.5	728.21	0	0	364.18	0	0	4091.6	0	3969.6	4	81.744	24.816	15
P15924	DSP	Desmoplakin	782.86	198.58	1021.5	529.18	503.12	0	564.34	105.8	268.05	1534.1	374.34	1722.8	6	331.77	37.344	12
P19652	ORM2	Alpha-1-acid glycoprotein 2	21753	4615.9	20236	4132.9	0	5426.4	0	0	9892.8	11587	2419.7	11922	4	23.602	19.321	9
P35326	SPRR2A	Small proline-rich protein 2A	13099	0	14966	0	0	0	4338.5	3316.4	0	26601	0	32777	2	7.9653	12.966	13
P25311	AZGP1	Zinc-alpha-2-glycoprotein	2407.5	0	0	0	0	0	3390.1	0	3816	0	0	0	1	34.258	6.8713	6
Q86SG5	S100A7A	Protein S100-A7A	14107	0	13322	0	0	0	0	0	0	3778.8	0	0	1	11.305	6.4492	3
P63261	ACTG1	Actin, cytoplasmic 2	8112.3	3174.2	20320	3898.2	3068.7	0	21594	9612.4	32314	11387	0	7047.5	8	41.792	50.843	32
P61626	LYZ	Lysozyme C	3418	0	3384.2	0	0	0	0	0	0	3091	0	3033.8	1	16.537	6.5488	3
P68104	EEF1A1	Elongation factor 1-alpha 1	1764.3	0	1951.5	0	0	0	2758.1	2648.7	2842.5	3615.7	0	3748.1	2	50.14	12.645	10
P68871	HBB	Hemoglobin subunit beta	145790	0	153580	0	1991.5	0	83753	13099	247440	54663	0	49890	10	15.998	149.76	89	41	20	140	56
P69905	HBA1	Hemoglobin subunit alpha	48910	29821	58017	22024	20288	2162.6	97918	60693	85912	17431	15617	19402	6	15.257	54.464	34
P81605	DCD	Dermcidin	33305	0	60436	0	7806	0	16323	0	24575	40430	0	45828	4	11.284	23.885	12
Q02413	DSG1	Desmoglein-1	1729.2	0	1946.4	0	0	0	1200.6	394.62	0	2808.3	0	3022.9	5	113.75	27.988	5
Q08554	DSC1	Desmocollin-1	808.32	0	974.91	0	0	0	0	0	0	1615.2	0	1684	1	99.986	6.6125	5
Q147U7	SMCO1	Single-pass membrane and coiled-coil domain-containing protein 1	0	2350.6	0	240.5	3601.7	0	0	0	0	0	0	0	1	24.597	6.6344	1
Q5T749	KPRP	Keratinocyte proline-rich protein	8377.6	1115.4	9857.4	3849.4	2665.3	2893.2	8408.8	3749.3	5520.4	18120	2062.1	19008	6	64.135	39.659	67

## Sheet: fold change
Protein ID	ratio NRP/NRB	ratio RP/RB	ratio baseline (RB/NRB)	ratio follow-up (RP/NRP)
A0A0B4J2B5	100	0.01	100	0.01
A2NJV5	0.581289	0.01	0.542947	0.01
O43933	0	100	0	100
P00738	0.640523	0.01	0.783182	0.01
P00915	0.01	0	0.01	100
P00918	0.01	0	0.01	0
P01009	2.88692	0.177471	2.30971	0.141988
P01023	0.546113	0.01	0.420496	0.01
P01024	0.882739	0.192458	0.786884	0.17156
P01834	0.557608	0.01	0.461159	0.01
P01857	13.2207	0.01	11.3866	0.01
P01859	100	0.01	100	0.01
P01860	0.273964	0.707378	0.278237	0.71841
P01871	0.483091	0.01	0.28943	0.01
P01876	0.63211	0.01	0.544975	0.01
P02042	0.01	0	0.01	0
P02647	1.5771	0.878747	0.900156	0.501558
P02671	0.178425	0.90385	0.12656	0.641116
P02675	0.715607	0.01	0.270001	0.01
P02679	0.671353	0.01	0.281682	0.01
P02763	4.43694	0.01	2.43957	0.01
P02766	100	0	0	0.01
P02787	0.341025	0.0232084	0.404473	0.0275263
P02790	100	0.01	100	0.01
P04040	100	0.01	100	0.01
P04406	2.54948	0.01	1.67523	0.01
P05109	4.10504	0.01	1.66375	0.01
P06702	100	0.01	100	0.01
P07355	100	0.01	100	0.01
P0DOY3	0.01	0.01	100	0.01
P0DP03	0.33705	0.01	0.406902	0.01
P14923	100	0.01	100	0.01
P15924	2.1349	0.426425	3.87047	0.773089
P19652	100	0.553015	100	0.30767
P25311	0.334092	0	0.01	0.01
P35326	3.66628	0.01	7.75686	0.01
P61626	100	0.01	100	0.01
P63261	0.49758	0.377927	0.435321	0.330639
P68104	0.675657	0.01	1.33899	0.01
P68871	1.30429	0.01	0.455513	0.01
P69905	0.559244	0.847943	0.214499	0.32523
P81605	2.29207	0.01	2.1091	0.01
Q02413	2.30413	0.01	3.65542	0.01
Q08554	100	0.01	100	0.01
Q147U7	0	100	0	100
Q5T749	1.09457	0.240058	2.21682	0.486186
Q86SG5	100	0	0	0.01
