# Supplementary material for: Phenotypic and Proteomic Analysis Identifies Hallmarks of Blood Circulating Extracellular Vesicles in NSCLC Responders to Immune Checkpoint Inhibitors
Source: Cancers (Basel). 2021 Feb 3;13(4):585. doi: 10.3390/cancers13040585 (PMC7913165; doi:10.3390/cancers13040585)
Supplement: Supplementary file 1 [file cancers-13-00585-s001.zip › Supplementary Table 11_Functional analysis.xlsx]

## Sheet: downstream_R
Categories	Diseases or Functions Annotation	p-value	Predicted Activation State	Activation z-score	Molecules	# Molecules
Cell Signaling,Molecular Transport,Vitamin and Mineral Metabolism	Quantity of Ca2+	2.39e-07	Decreased	-2.394	A2M,ANXA2,C3,IGHM,IGKC,LYZ,ORM1,S100A8,S100A9	9
Cellular Movement	Chemotaxis	4.7e-05	Decreased	-2.377	A2M,ANXA2,APOA1,C3,HP,S100A8,S100A9,SERPINA1	8
Organismal Survival	Survival of organism	1.48e-05	Decreased	-2.302	APOA1,C3,DSP,HP,IGHM,JUP,LYZ,ORM1,ORM2,S100A9	10
Molecular Transport	Secretion of molecule	8.29e-07	Decreased	-2.28	A2M,ANXA2,APOA1,FGA,FGB,FGG,GAPDH,IGHM,S100A8,S100A9	10
Cellular Movement,Hematological System Development and Function,Immune Cell Trafficking,Inflammatory Response	Migration of phagocytes	0.000451	Decreased	-2.224	ANXA2,APOA1,C3,S100A8,S100A9	5
Cellular Movement,Hematological System Development and Function,Immune Cell Trafficking,Inflammatory Response	Chemotaxis of phagocytes	5.61e-05	Decreased	-2.195	APOA1,C3,HP,S100A8,S100A9,SERPINA1	6
Cellular Movement	Chemotaxis of myeloid cells	4.57e-05	Decreased	-2.19	APOA1,C3,HP,S100A8,S100A9,SERPINA1	6
Immunological Disease	Hypersensitive reaction	2.49e-09	Decreased	-2.132	C3,CAT,DCD,EEF1A1,HBB,IGHG1,IGHM,IGKC,JUP,S100A8,S100A9	11
Carbohydrate Metabolism	Uptake of monosaccharide	0.000363	Decreased	-2.091	A2M,APOA1,C3,CAT,JUP	5
Cellular Function and Maintenance	Endocytosis	3.16e-10	Decreased	-2.015	ACTG1,APOA1,C3,HBB,HP,HPX,IGHA1,IGHM,IGKC,IGKV2-29,IGLC3,S100A9,TF	13
Carbohydrate Metabolism,Molecular Transport,Small Molecule Biochemistry	Uptake of D-glucose	0.00134		-1.997	A2M,APOA1,CAT,JUP	4
Hematological System Development and Function	Hemostasis	4.14e-08		-1.982	A2M,ANXA2,C3,FGA,FGB,FGG,HBB,HP,IGHM	9
Cellular Movement	Homing of cells	8.97e-06		-1.975	A2M,ANXA2,APOA1,C3,HP,IGHG1,S100A8,S100A9,SERPINA1	9
Hematological System Development and Function,Inflammatory Response,Tissue Morphology	Quantity of phagocytes	0.000564		-1.91	C3,IGHM,S100A8,S100A9,SERPINA1,TF	6
Inflammatory Response	Immune response of cells	8.71e-08		-1.803	APOA1,C3,CAT,GAPDH,IGHA1,IGHG1,IGHG3,IGHM,IGKC,S100A8,S100A9	11
Cellular Movement,Hematological System Development and Function,Immune Cell Trafficking,Inflammatory Response	Cell movement of phagocytes	0.00052		-1.765	ANXA2,APOA1,C3,HP,S100A8,S100A9,SERPINA1	7
Cellular Movement,Hematological System Development and Function,Immune Cell Trafficking	Homing of leukocytes	2.54e-05		-1.757	APOA1,C3,HP,IGHG1,S100A8,S100A9,SERPINA1	7
Cellular Movement,Hematological System Development and Function,Immune Cell Trafficking,Inflammatory Response	Chemotaxis of neutrophils	2.08e-05		-1.729	APOA1,C3,S100A8,S100A9,SERPINA1	5
Cellular Movement	Cell movement of myeloid cells	0.000486		-1.695	ANXA2,APOA1,C3,HP,S100A8,S100A9,SERPINA1	7
Hematological System Development and Function,Inflammatory Response,Tissue Morphology	Quantity of neutrophils	0.000184		-1.667	C3,S100A8,S100A9,SERPINA1,TF	5
Cellular Function and Maintenance	Engulfment of cells	0.000101		-1.647	APOA1,C3,CAT,HP,IGHG1,IGHM,S100A9	7
Cell-To-Cell Signaling and Interaction	Response of myeloid cells	0.000147		-1.58	APOA1,C3,IGHA1,IGHG3,S100A9	5
Cell-To-Cell Signaling and Interaction	Activation of cells	5.78e-07		-1.569	ANXA2,APOA1,C3,CAT,FGA,FGG,IGHG1,IGHG3,IGHM,S100A8,S100A9,SERPINA1,TF	13
Cell-To-Cell Signaling and Interaction,Hematological System Development and Function,Immune Cell Trafficking,Inflammatory Response	Activation of leukocytes	3.38e-05		-1.476	ANXA2,APOA1,C3,FGG,IGHG1,IGHG3,IGHM,S100A8,S100A9	9
Inflammatory Response	Inflammatory response	4.27e-07		-1.431	ANXA2,APOA1,C3,FGG,HP,IGHG1,IGHM,LYZ,ORM1,S100A8,S100A9,SERPINA1	12
Cardiovascular System Development and Function	Development of vasculature	1.84e-06		-1.414	ANXA2,APOA1,C3,CAT,FGA,HP,IGHG1,IGHM,JUP,ORM1,S100A8,S100A9,TF	13
Cell-To-Cell Signaling and Interaction,Inflammatory Response	Immune response of phagocytes	0.00123		-1.396	APOA1,C3,IGHA1,S100A9	4
Molecular Transport	Transport of molecule	2.78e-08		-1.365	A2M,ANXA2,APOA1,C3,CAT,FGA,FGB,FGG,GAPDH,HBB,HP,HPX,IGHM,JUP,PEX1,S100A8,S100A9,TF	18
Cell-To-Cell Signaling and Interaction,Inflammatory Response	Immune response of leukocytes	8.61e-05		-1.364	APOA1,C3,IGHA1,IGHG3,IGHM,S100A9	6
Hematological System Development and Function,Tissue Morphology	Quantity of leukocytes	1.34e-05		-1.349	APOA1,C3,HBB,HPX,IGHA1,IGHM,IGKC,S100A8,S100A9,SERPINA1,TF	11
Hematological System Development and Function,Tissue Morphology	Quantity of myeloid cells	0.00204		-1.289	C3,HBB,S100A8,S100A9,SERPINA1,TF	6
Cell Death and Survival	Cytolysis	1.93e-07		-1.287	C3,CAT,FGA,HBB,IGHG1,IGHG3,IGKC,LYZ	8
Lipid Metabolism,Small Molecule Biochemistry	Synthesis of lipid	0.000793		-1.233	A2M,APOA1,C3,CAT,EEF1A1,HBB,IGHM,SERPINA1	8
Molecular Transport	Quantity of metal	9.15e-10		-1.207	A2M,ANXA2,C3,HP,HPX,IGHM,IGKC,LYZ,ORM1,S100A8,S100A9,TF	12
Cardiovascular System Development and Function,Cellular Development,Cellular Function and Maintenance,Cellular Growth and Proliferation,Organismal Development,Tissue Development	Endothelial cell development	0.000238		-1.206	ANXA2,APOA1,C3,IGHG1,S100A8,S100A9	6
Cardiovascular System Development and Function,Organismal Development	Angiogenesis	2.09e-05		-1.204	ANXA2,APOA1,C3,CAT,HP,IGHG1,JUP,ORM1,S100A8,S100A9,TF	11
Molecular Transport,Protein Trafficking	Secretion of protein	1.86e-06		-1.192	ANXA2,FGA,FGB,FGG,GAPDH,IGHM	6
Cellular Movement,Hematological System Development and Function,Immune Cell Trafficking	Cell movement of leukocytes	0.000161		-1.126	ANXA2,APOA1,C3,FGB,HP,IGHG1,S100A8,S100A9,SERPINA1	9
Cell Death and Survival	Cell survival	0.00126		-1.105	A2M,C3,CAT,DCD,HBB,IGHM,JUP,LYZ,S100A8,S100A9,TF	11
Cell-To-Cell Signaling and Interaction,Cellular Function and Maintenance,Inflammatory Response	Phagocytosis of cells	0.000624		-1.089	APOA1,C3,CAT,IGHG1,S100A9	5
Cellular Movement	Migration of cells	8.18e-09		-1.022	A2M,ANXA2,APOA1,C3,CAT,DSP,FGA,FGB,HP,IGHA1,IGHG1,IGHM,IGKC,IGKV2-29,IGLC3,JUP,LYZ,ORM1,S100A8,S100A9,SERPINA1	21
Cell-To-Cell Signaling and Interaction,Hematological System Development and Function,Immune Cell Trafficking,Inflammatory Response	Adhesion of neutrophils	2.44e-08		-1.022	APOA1,C3,FGA,S100A8,S100A9,SERPINA1	6
Cell Signaling,Cellular Function and Maintenance,Molecular Transport,Vitamin and Mineral Metabolism	Flux of Ca2+	4.96e-05		-0.946	A2M,ANXA2,APOA1,C3,IGHM,SERPINA1	6
Cellular Function and Maintenance	Ion homeostasis of cells	0.000492		-0.946	A2M,ANXA2,APOA1,C3,IGHM,SERPINA1,TF	7
Cellular Assembly and Organization,Cellular Function and Maintenance	Organization of cytoplasm	0.00192		-0.911	A2M,ACTG1,C3,DSP,EEF1A1,GAPDH,JUP,PEX1,S100A8,S100A9,TF	11
Cancer,Organismal Injury and Abnormalities	Growth of tumor	0.00209		-0.911	ANXA2,APOA1,EEF1A1,FGA,GAPDH,IGHG1,IGHM,S100A9	8
Cardiovascular System Development and Function,Cellular Development,Cellular Function and Maintenance,Cellular Growth and Proliferation,Organismal Development,Tissue Development	Proliferation of endothelial cells	0.000979		-0.9	APOA1,C3,IGHG1,S100A8,S100A9	5
Cellular Movement,Immune Cell Trafficking	Leukocyte migration	7.13e-10		-0.867	ANXA2,APOA1,C3,CAT,FGB,HP,IGHA1,IGHG1,IGHM,IGKC,IGKV2-29,IGLC3,LYZ,S100A8,S100A9,SERPINA1	16
Hematological System Development and Function,Humoral Immune Response,Lymphoid Tissue Structure and Development,Tissue Morphology	Quantity of B lymphocytes	0.0016		-0.825	C3,HPX,IGHA1,IGHM,IGKC	5
Cell Death and Survival	Cell death of immune cells	0.000991		-0.816	C3,CAT,GAPDH,IGHM,LYZ,S100A8,SERPINA1	7
Cell Death and Survival	Apoptosis of carcinoma cell lines	0.00074		-0.806	ANXA2,DSP,FGA,GAPDH,JUP	5
Cardiovascular System Development and Function,Organismal Development	Vasculogenesis	0.000122		-0.792	ANXA2,APOA1,C3,CAT,IGHG1,ORM1,S100A8,S100A9,TF	9
Cellular Development,Cellular Growth and Proliferation,Hematological System Development and Function,Lymphoid Tissue Structure and Development	Proliferation of lymphocytes	7.13e-05		-0.751	A2M,APOA1,C3,DSG1,HPX,IGHG1,IGHM,IGKC,SERPINA1	9
Cellular Function and Maintenance	Cellular homeostasis	0.000162		-0.737	A2M,ANXA2,APOA1,C3,CAT,HPX,IGHG1,IGHM,IGKC,S100A8,S100A9,SERPINA1,TF	13
Gastrointestinal Disease,Inflammatory Response	Inflammation of gastrointestinal tract	0.000129		-0.728	C3,FGA,IGHG1,IGHM,IGKC,S100A8,TF	7
Cell-To-Cell Signaling and Interaction	Response of myeloid leukocytes	8.64e-05		-0.662	C3,IGHA1,IGHG3,S100A9	4
Infectious Diseases	Replication of virus	0.00158		-0.626	CAT,EEF1A1,IGKC,S100A8,S100A9,SERPINA1	6
Cellular Movement	Cell movement of tumor cell lines	0.000245		-0.623	A2M,ANXA2,C3,CAT,DSP,FGA,JUP,S100A8,S100A9,SERPINA1	10
Infectious Diseases	Viral Infection	1.85e-05		-0.613	ANXA2,APOA1,C3,CAT,DCD,EEF1A1,FGA,GAPDH,HP,IGHM,IGKC,S100A8,S100A9,SERPINA1	14
Cell Death and Survival	Apoptosis of tumor cell lines	1.25e-05		-0.61	ANXA2,CAT,DSG1,DSP,EEF1A1,FGA,GAPDH,IGHG1,IGHM,JUP,S100A8,S100A9,TF	13
Cell Death and Survival	Cell death of myeloid cells	0.00186		-0.577	CAT,LYZ,S100A8,SERPINA1	4
Cellular Movement,Hematological System Development and Function,Immune Cell Trafficking,Inflammatory Response	Cell movement of neutrophils	8.19e-05		-0.576	ANXA2,APOA1,C3,S100A8,S100A9,SERPINA1	6
Cell-To-Cell Signaling and Interaction	Binding of myeloid cells	2.84e-07		-0.467	APOA1,C3,FGA,ORM1,S100A8,S100A9,SERPINA1	7
Cell-To-Cell Signaling and Interaction,Hematological System Development and Function	Activation of myeloid cells	0.000122		-0.44	ANXA2,C3,FGG,IGHG1,S100A8,S100A9	6
Cellular Development,Cellular Growth and Proliferation	Cell proliferation of breast cancer cell lines	0.00142		-0.412	ANXA2,CAT,DCD,EEF1A1,IGKC,TF	6
Connective Tissue Disorders,Inflammatory Disease,Inflammatory Response,Organismal Injury and Abnormalities,Skeletal and Muscular Disorders	Experimentally-induced arthritis	1.99e-05		-0.392	APOA1,C3,FGA,FGG,IGHG1	5
Cellular Movement	Cell movement	9.87e-09		-0.376	A2M,ANXA2,APOA1,C3,CAT,DSP,FGA,FGB,GAPDH,HP,IGHA1,IGHG1,IGHM,IGKC,IGKV2-29,IGLC3,JUP,LYZ,ORM1,S100A8,S100A9,SERPINA1	22
Cell-To-Cell Signaling and Interaction,Hematological System Development and Function,Immune Cell Trafficking,Inflammatory Response	Activation of phagocytes	2.04e-05		-0.371	ANXA2,APOA1,C3,FGG,IGHG1,S100A8,S100A9	7
Cellular Development,Cellular Growth and Proliferation,Hematological System Development and Function,Lymphoid Tissue Structure and Development	Cell proliferation of T lymphocytes	0.000608		-0.311	A2M,APOA1,C3,DSG1,HPX,IGHG1,IGHM	7
Dermatological Diseases and Conditions,Inflammatory Disease,Inflammatory Response,Organismal Injury and Abnormalities	Dermatitis	2.68e-13		-0.277	C3,CAT,DCD,DSC1,DSG1,DSP,EEF1A1,HBB,IGHG1,IGHM,IGKC,JUP,S100A8,S100A9	14
Cellular Movement	Migration of tumor cell lines	0.000319		-0.24	A2M,ANXA2,CAT,DSP,FGA,JUP,S100A8,S100A9,SERPINA1	9
Cell-To-Cell Signaling and Interaction,Hematological System Development and Function,Immune Cell Trafficking,Inflammatory Response	Activation of antigen presenting cells	6.56e-06		-0.218	ANXA2,APOA1,C3,FGG,IGHG1,IGHM,S100A9	7
Cell-To-Cell Signaling and Interaction,Hematological System Development and Function,Inflammatory Response	Binding of professional phagocytic cells	7.71e-09		-0.196	A2M,APOA1,C3,FGA,ORM1,S100A8,S100A9,SERPINA1	8
Cellular Development,Cellular Growth and Proliferation,Hematological System Development and Function,Lymphoid Tissue Structure and Development	Proliferation of immune cells	1.8e-05		-0.194	A2M,APOA1,C3,CAT,DSG1,HPX,IGHG1,IGHM,IGKC,SERPINA1	10
Cell-To-Cell Signaling and Interaction	Adhesion of blood cells	1.08e-08		-0.193	A2M,APOA1,C3,FGA,FGG,IGHM,ORM1,S100A8,S100A9,SERPINA1	10
Cell-To-Cell Signaling and Interaction,Hematological System Development and Function,Inflammatory Response	Aggregation of blood platelets	4.94e-05		-0.152	C3,FGA,FGB,FGG,IGHM	5
Cancer,Organismal Injury and Abnormalities,Tumor Morphology	Invasion of tumor	0.000136		-0.152	ANXA2,DSP,JUP,S100A8,S100A9	5
Cell-To-Cell Signaling and Interaction	Aggregation of cells	7.28e-06		-0.128	C3,FGA,FGB,FGG,IGHM,JUP,LYZ	7
Free Radical Scavenging	Synthesis of reactive oxygen species	1.9e-06		-0.069	ANXA2,APOA1,C3,CAT,HBB,HP,S100A8,SERPINA1,TF	9
Free Radical Scavenging	Production of reactive oxygen species	0.00172		-0.054	ANXA2,C3,CAT,HBB,S100A8	5
Cellular Movement,Hematological System Development and Function,Immune Cell Trafficking	Cellular infiltration by leukocytes	5.74e-05		-0.003	ANXA2,APOA1,C3,FGB,S100A8,S100A9,SERPINA1	7
Cell-To-Cell Signaling and Interaction,Hematological System Development and Function,Immune Cell Trafficking	Adhesion of immune cells	8.27e-08		0.049	A2M,APOA1,C3,FGA,FGG,ORM1,S100A8,S100A9,SERPINA1	9
Cardiovascular Disease,Organismal Injury and Abnormalities,Skeletal and Muscular Disorders	Myocardial infarction	0.000163		0.068	APOA1,C3,FGB,FGG,TF	5
Cell Death and Survival	Necrosis	5.76e-05		0.072	A2M,ANXA2,APOA1,C3,CAT,DSG1,DSP,EEF1A1,FGA,GAPDH,IGHG1,IGHM,JUP,LYZ,S100A8,S100A9,SERPINA1,TF	18
Hematological System Development and Function,Tissue Development	Accumulation of myeloid cells	2.22e-06		0.098	APOA1,C3,DSC1,IGHG1,S100A8,S100A9	6
Cell Death and Survival,Skeletal and Muscular Disorders	Cell death of muscle cells	0.00096		0.106	APOA1,CAT,DSP,EEF1A1,GAPDH	5
Protein Synthesis	Metabolism of protein	4.28e-06		0.114	APOA1,C3,CAT,DSG1,EEF1A1,FGA,FGG,GAPDH,IGHM,LYZ,S100A9,SERPINA1,TF	13
Hematological System Development and Function,Immune Cell Trafficking,Inflammatory Response,Tissue Development	Accumulation of phagocytes	6.14e-07		0.115	APOA1,C3,DSC1,IGHG1,S100A8,S100A9	6
Connective Tissue Disorders,Inflammatory Disease,Inflammatory Response,Organismal Injury and Abnormalities,Skeletal and Muscular Disorders	Inflammation of joint	7.12e-08		0.185	APOA1,C3,FGA,FGB,FGG,HBB,HP,IGHG1,IGHM,IGKC,LYZ,S100A8,S100A9,TF	14
Connective Tissue Disorders,Inflammatory Disease,Organismal Injury and Abnormalities,Skeletal and Muscular Disorders	Rheumatic Disease	2.45e-07		0.185	APOA1,C3,FGA,FGB,FGG,HBB,HP,IGHG1,IGHM,IGKC,JUP,LYZ,S100A8,S100A9,TF	15
Inflammatory Response	Inflammation of body cavity	0.000139		0.327	APOA1,C3,FGA,GAPDH,HP,HPX,IGHG1,IGHM,S100A8,TF	10
Tissue Morphology	Quantity of cells	7.34e-06		0.375	A2M,APOA1,C3,CAT,DSP,HBB,HPX,IGHA1,IGHG1,IGHM,IGKC,ORM1,S100A8,S100A9,SERPINA1,TF	16
Cellular Movement	Invasion of cells	0.00115		0.415	A2M,ANXA2,CAT,DSP,IGHG1,JUP,S100A8,S100A9,SERPINA1	9
Cell-To-Cell Signaling and Interaction,Cellular Movement,Hematological System Development and Function,Immune Cell Trafficking	Recruitment of granulocytes	6.42e-06		0.475	APOA1,C3,CAT,IGHG1,LYZ,S100A8	6
Cellular Movement	Cellular infiltration	1.52e-06		0.521	ANXA2,APOA1,C3,FGB,GAPDH,IGHM,S100A8,S100A9,SERPINA1	9
Cardiovascular Disease,Cell Death and Survival,Organismal Injury and Abnormalities,Skeletal and Muscular Disorders	Apoptosis of cardiomyocytes	0.000643		0.594	APOA1,CAT,DSP,GAPDH	4
Cell Death and Survival	Apoptosis	0.00022		0.715	A2M,ANXA2,APOA1,C3,CAT,DSG1,DSP,EEF1A1,FGA,GAPDH,IGHG1,IGHM,JUP,S100A8,S100A9,SERPINA1,TF	17
Cell Death and Survival,Neurological Disease,Organismal Injury and Abnormalities	Apoptosis of brain cells	0.000227		0.747	A2M,CAT,GAPDH,IGHG1	4
Inflammatory Response,Organismal Injury and Abnormalities	Inflammation of organ	1.7e-11		0.83	APOA1,C3,CAT,DCD,DSC1,DSG1,DSP,EEF1A1,FGA,GAPDH,HBB,HP,HPX,IGHG1,IGHM,IGKC,JUP,S100A8,S100A9,TF	20
Cell-To-Cell Signaling and Interaction,Cellular Movement,Hematological System Development and Function,Immune Cell Trafficking,Inflammatory Response	Recruitment of neutrophils	0.000633		0.849	APOA1,CAT,LYZ,S100A8	4
Immunological Disease,Inflammatory Disease,Inflammatory Response,Neurological Disease,Organismal Injury and Abnormalities	Experimental autoimmune encephalomyelitis	0.00124		0.865	C3,FGA,HPX,IGHG1,IGHM	5
Organismal Injury and Abnormalities	Bleeding	6.32e-07		0.902	ANXA2,C3,FGA,FGB,FGG,JUP,S100A9,SERPINA1,TF	9
Free Radical Scavenging	Generation of reactive oxygen species	0.0011		0.943	APOA1,CAT,HP,TF	4
Inflammatory Response	Inflammation of absolute anatomical region	0.000659		1.018	APOA1,C3,FGA,GAPDH,HP,HPX,IGHG1,IGHM,S100A8,TF	10
Cell-To-Cell Signaling and Interaction,Hematological System Development and Function,Immune Cell Trafficking	Binding of antigen presenting cells	2.51e-05		1.091	A2M,APOA1,FGA,ORM1	4
Cellular Movement,Hematological System Development and Function,Immune Cell Trafficking,Inflammatory Response	Infiltration by neutrophils	0.000603		1.103	ANXA2,APOA1,C3,SERPINA1	4
Cellular Compromise	Injury of cells	1.6e-05		1.109	C3,CAT,HP,HPX	4
Protein Trafficking	Interaction of protein	2.78e-06		1.131	A2M,ANXA2,CAT,FGA,FGB,GAPDH,TF	7
Cell Death and Survival,Neurological Disease,Organismal Injury and Abnormalities	Cell death of brain cells	0.000345		1.153	A2M,CAT,GAPDH,IGHG1,TF	5
Organismal Injury and Abnormalities	Fibrosis	1.32e-05		1.342	APOA1,C3,DSP,FGG,HBB,HP,HPX,IGHG1,IGHM	9
Cancer,Cell Death and Survival,Organismal Injury and Abnormalities,Tumor Morphology	Cell death of tumor cells	0.000583		1.506	ANXA2,CAT,EEF1A1,IGHG1,IGHM,TF	6
Cancer,Cell Death and Survival,Organismal Injury and Abnormalities,Tumor Morphology	Necrosis of tumor	8.56e-05		1.751	ANXA2,CAT,EEF1A1,FGA,IGHG1,IGHM,TF	7
Cellular Growth and Proliferation,Organismal Development	Growth of bacteria	5.72e-07		1.936	APOA1,DCD,LYZ,ORM1,TF	5
Organismal Survival	Organismal death	0.000242	Increased	3.58	ACTG1,ANXA2,APOA1,C3,DSP,FGA,FGG,HP,IGHG1,IGHM,JUP,LYZ,S100A8,S100A9,SERPINA1,TF	16

## Sheet: upstream_R
Upstream Regulator	Expr Fold Change	Molecule Type	Predicted Activation State	Activation z-score	Flags	p-value of overlap	Target Molecules in Dataset	Mechanistic Network
IL6		cytokine	Inhibited	-3.519	bias	8.87e-12	A2M,APOA1,C3,FGA,FGB,FGG,HP,HPX,IGHM,LYZ,ORM1,S100A9,SERPINA1,TF	14 (3)
STAT3		transcription regulator	Inhibited	-2.941	bias	1.85e-09	A2M,CAT,FGA,FGB,FGG,HBB,HP,LYZ,PEX1,S100A9,SERPINA1
beta-estradiol		chemical - endogenous mammalian	Inhibited	-2.77	bias	0.00504	A2M,APOA1,C3,DSP,FGB,HBB,LYZ,SERPINA1,TF	9 (2)
PRDM1		transcription regulator	Inhibited	-2.63		8.18e-08	FGA,FGB,FGG,IGHG1,IGHM,S100A8,S100A9
dexamethasone		chemical drug	Inhibited	-2.593		7.54e-09	ACTG1,APOA1,C3,CAT,EEF1A1,FGA,FGB,FGG,GAPDH,HP,IGHM,IGKC,ORM1,S100A8,S100A9,SERPINA1,TF	21 (5)
lipopolysaccharide		chemical drug	Inhibited	-2.457	bias	1.2e-06	APOA1,C3,FGB,HP,IGHG1,IGHM,IGKC,LYZ,ORM1,ORM2,S100A8,S100A9,SERPINA1,TF
OSM		cytokine	Inhibited	-2.454	bias	1.94e-07	A2M,ANXA2,CAT,FGA,FGB,HP,S100A8,S100A9,SERPINA1	15 (3)
allopurinol		chemical drug	Inhibited	-2.236	bias	4.89e-07	A2M,ANXA2,CAT,FGA,FGB
cisplatin		chemical drug	Inhibited	-2.213	bias	0.00164	A2M,ANXA2,CAT,FGA,FGB,LYZ	12 (2)
IL1A		cytokine	Inhibited	-2.2	bias	4.38e-05	C3,ORM1,S100A8,S100A9,SERPINA1
IL1		group	Inhibited	-2.195	bias	0.000236	C3,HP,LYZ,ORM1,S100A9
IL22		cytokine	Inhibited	-2.19	bias	2.04e-06	C3,FGA,HP,S100A8,S100A9	9 (4)
HNF4A		transcription regulator	Inhibited	-2.177		0.000107	APOA1,C3,CAT,FGA,FGB,GAPDH,HPX,ORM1,ORM2,S100A9,SERPINA1,TF
CEBPB		transcription regulator	Inhibited	-2.176	bias	3.55e-07	C3,HBB,HP,HPX,IGKC,ORM1,SERPINA1,TF
IL23A		cytokine	Inhibited	-2	bias	2.41e-07	HP,HPX,S100A8,S100A9
hexachlorobenzene		chemical toxicant	Inhibited	-2	bias	2.27e-06	A2M,ANXA2,FGA,FGB
gentamicin C		chemical drug	Inhibited	-2	bias	3.61e-06	A2M,ANXA2,FGA,FGB
lomustine		chemical drug	Inhibited	-2	bias	3.61e-06	A2M,ANXA2,FGA,FGB
triamterene		chemical drug	Inhibited	-2	bias	4.09e-06	A2M,ANXA2,FGA,FGB
methotrexate		chemical drug	Inhibited	-2		4.64e-05	ACTG1,C3,FGA,GAPDH,ORM1
CASR		G-protein coupled receptor	Inhibited	-2	bias	7.34e-05	DSG1,S100A8,S100A9,SERPINA1
EGF		growth factor		-1.99	bias	0.00153	APOA1,EEF1A1,S100A9,SERPINA1,TF
forskolin		chemical toxicant		-1.987	bias	0.0302	APOA1,HP,ORM1,S100A8
phenacetin		chemical drug		-1.982	bias	6.53e-07	A2M,ANXA2,FGA,FGB
ROCK2		kinase		-1.982	bias	1.44e-06	DSC1,DSG1,DSP,S100A8
fenamic acid		chemical reagent		-1.982	bias	4.89e-06	A2M,ANXA2,FGA,FGB
tetradecanoylphorbol acetate		chemical drug		-1.98	bias	0.000583	C3,CAT,DCD,DSG1,LYZ,S100A8,S100A9,SERPINA1	12 (4)
MYD88		other		-1.969	bias	0.000956	C3,HP,IGHG1,S100A8
IL5		cytokine		-1.969	bias	0.00125	A2M,ANXA2,IGHG1,IGHM
IGF1		growth factor		-1.969	bias	0.00794	A2M,GAPDH,HBB,TF
Stat3-Stat3		complex		-1.949	bias	2.12e-07	A2M,FGA,FGB,FGG
genistein		chemical drug		-1.948		0.00422	A2M,APOA1,C3,CAT	6 (2)
IL4		cytokine		-1.917	bias	3.58e-07	ACTG1,ANXA2,C3,CAT,DSC1,DSG1,IGHG1,IGHG2,IGHG3,S100A8,S100A9
L-triiodothyronine		chemical - endogenous mammalian		-1.757	bias	8.27e-06	A2M,APOA1,FGA,HP,IGHM,LYZ,TF	7 (2)
TNF		cytokine		-1.646	bias	4.17e-06	A2M,APOA1,C3,CAT,DCD,FGG,HP,IGKC,JUP,ORM1,S100A8,S100A9,TF	19 (6)
vancomycin		biologic drug		-1.633	bias	6.19e-09	A2M,ANXA2,C3,CAT,FGA,FGB
rosiglitazone		chemical drug		-1.633	bias	1.02e-05	C3,CAT,FGB,GAPDH,HP,S100A8,S100A9	17 (10)
TP53		transcription regulator		-1.459		0.00323	A2M,ANXA2,APOA1,CAT,EEF1A1,GAPDH,LYZ,ORM1,ORM2
CEBPA		transcription regulator		-1.387	bias	8.42e-05	A2M,C3,GAPDH,HP,S100A8,S100A9	11 (3)
VDR		transcription regulator		-1.342		4.13e-05	DSG1,FGG,S100A8,S100A9,SERPINA1
IL1B		cytokine		-1.341	bias	1.67e-05	A2M,C3,CAT,FGB,FGG,HP,ORM1,S100A8,S100A9	23 (9)
Ins1		other		-1.279	bias	0.00167	APOA1,GAPDH,HP,TF	5 (2)
IFNG		cytokine		-1.221	bias	0.000411	A2M,C3,CAT,EEF1A1,FGG,IGHG1,S100A8,S100A9,SERPINA1	18 (5)
carbon tetrachloride		chemical toxicant		-1.177	bias	0.000428	APOA1,CAT,FGG,TF
LEP		growth factor		-1.131	bias	0.00646	APOA1,GAPDH,HPX,ORM1
hydrogen peroxide		chemical - endogenous mammalian		-1.1	bias	0.00956	ANXA2,CAT,DCD,EEF1A1
tamoxifen		chemical drug		-1.091		0.00125	C3,CAT,GAPDH,ORM1
acetaminophen		chemical drug		-1	bias	1.17e-05	A2M,ACTG1,CAT,ORM1,TF
indomethacin		chemical drug		-1		4.64e-05	A2M,ANXA2,FGA,FGB,S100A8
tretinoin		chemical - endogenous mammalian		-0.914	bias	1.05e-07	A2M,ANXA2,C3,DSC1,DSG1,DSP,EEF1A1,FGG,HPX,IGHM,PEX1,S100A8,S100A9,TF
methylprednisolone		chemical drug		-0.882		0.00171	A2M,ANXA2,DSG1,JUP,SERPINA1
puromycin aminonucleoside		chemical reagent		-0.816	bias	1.7e-08	A2M,ACTG1,ANXA2,CAT,FGA,FGB
cyclosporin A		biologic drug		-0.816	bias	8.32e-05	A2M,ANXA2,FGA,FGB,HPX,S100A9
GW 4064		chemical toxicant		-0.784	bias	2.43e-06	APOA1,FGA,FGB,FGG
chenodeoxycholic acid		chemical - endogenous mammalian		-0.784	bias	1.23e-05	APOA1,FGA,FGB,FGG
calcitriol		chemical drug		-0.692		2.59e-07	ANXA2,APOA1,C3,FGG,GAPDH,S100A8,S100A9,SERPINA1,TF
doxorubicin		chemical drug		-0.557	bias	7.35e-05	A2M,ANXA2,CAT,EEF1A1,FGA,FGB
D-glucose		chemical - endogenous mammalian		-0.426	bias	0.0042	C3,CAT,GAPDH,HP,S100A8	11 (4)
PPARG		ligand-dependent nuclear receptor		-0.408	bias	1.32e-05	APOA1,C3,CAT,GAPDH,HP,S100A8,SERPINA1	15 (5)
pirinixic acid		chemical toxicant		-0.172	bias	4.94e-07	ANXA2,APOA1,C3,CAT,FGB,GAPDH,HPX,ORM1	13 (3)
SRF		transcription regulator		-0.152	bias	0.000245	A2M,ACTG1,IGHM,S100A8,S100A9	8 (2)
PML		transcription regulator		-0.128		2.67e-07	ACTG1,APOA1,CAT,HBB,JUP,LYZ
MYC		transcription regulator		-0.07	bias	0.0378	DSP,GAPDH,LYZ,SERPINA1,TF
EZH2		transcription regulator		0		0.00369	C3,S100A8,S100A9,SERPINA1
Immunoglobulin		complex		0.061		0.0121	DSP,JUP,S100A8,S100A9
methapyrilene		chemical drug		0.378		2.52e-09	A2M,ACTG1,ANXA2,CAT,EEF1A1,FGA,ORM1
ciprofibrate		chemical drug		0.562		3.89e-06	ANXA2,CAT,FGA,FGB,SERPINA1
ethanol		chemical - endogenous mammalian		0.625	bias	0.0004	APOA1,CAT,IGHM,ORM1,SERPINA1
PPARA		ligand-dependent nuclear receptor		0.675		2.42e-09	ANXA2,APOA1,C3,CAT,FGA,FGB,FGG,HPX,S100A8,S100A9	14 (3)
fenofibrate		chemical drug		0.724	bias	2.26e-07	APOA1,CAT,FGA,FGB,FGG,GAPDH,HP
nitrofurantoin		chemical drug		0.847		1.7e-15	A2M,ACTG1,ANXA2,C3,CAT,EEF1A1,FGA,FGB,HPX,ORM1,SERPINA1
4-methylnitrosoamino-1-(3-pyridinyl)-1-butanone		chemical toxicant		1	bias	4.82e-07	APOA1,HP,SERPINA1,TF
benzo(a)pyrene		chemical toxicant		1	bias	0.000466	APOA1,HP,SERPINA1,TF
FOS		transcription regulator		1.131		3.02e-05	A2M,ACTG1,C3,CAT,FGA,S100A8,S100A9
PD98059		chemical - kinase inhibitor		1.195	bias	3.23e-05	APOA1,C3,DSG1,EEF1A1,S100A8,SERPINA1,TF
TGFB1		growth factor		1.718	bias	0.000115	ANXA2,C3,CAT,DSP,EEF1A1,FGA,FGB,FGG,IGHM,JUP,SERPINA1
U0126		chemical - kinase inhibitor		1.964	bias	0.000209	C3,EEF1A1,IGHA1,IGHM,S100A9,TF
cycloheximide		chemical reagent		1.98		0.00327	APOA1,CAT,EEF1A1,S100A8	10 (4)
RXRA		ligand-dependent nuclear receptor		1.982		8.57e-06	APOA1,C3,CAT,FGG,LYZ,S100A8	15 (4)
actinomycin D		biologic drug		1.997	bias	0.000625	APOA1,FGB,GAPDH,TF

## Sheet: downstream_NR
Categories	Diseases or Functions Annotation	p-value	Predicted Activation State	Activation z-score	Molecules	# Molecules
Tissue Morphology	Quantity of cells	3.31e-05	Decreased	-2.011	A2M,APOA1,C3,CAT,DSP,HBB,HPX,IGHA1,IGHG1,IGHM,IGKC,ORM1,S100A8,S100A9,SERPINA1,TF	16
Hematological System Development and Function	Hemostasis	6.83e-09		-1.982	A2M,ANXA2,C3,FGA,FGB,FGG,HBB,HBD,HP,IGHM	10
Connective Tissue Disorders,Inflammatory Disease,Inflammatory Response,Organismal Injury and Abnormalities,Skeletal and Muscular Disorders	Experimentally-induced arthritis	1.73e-06		-1.961	APOA1,AZGP1,C3,FGA,FGG,IGHG1	6
Cellular Movement,Hematological System Development and Function,Immune Cell Trafficking,Inflammatory Response	Infiltration by neutrophils	0.000886		-1.951	ANXA2,APOA1,C3,SERPINA1	4
Cell-To-Cell Signaling and Interaction,Inflammatory Response	Immune response of leukocytes	0.000153		-1.861	APOA1,C3,IGHA1,IGHG3,IGHM,S100A9	6
Cell-To-Cell Signaling and Interaction	Response of myeloid leukocytes	0.000129		-1.838	C3,IGHA1,IGHG3,S100A9	4
Protein Synthesis	Metabolism of protein	4.14e-07		-1.709	APOA1,AZGP1,C3,CAT,DSG1,EEF1A1,FGA,FGG,GAPDH,IGHM,LYZ,S100A9,SERPINA1,TF,TTR	15
Connective Tissue Disorders,Inflammatory Disease,Inflammatory Response,Organismal Injury and Abnormalities,Skeletal and Muscular Disorders	Inflammation of joint	4.69e-09		-1.558	APOA1,AZGP1,C3,CA2,FGA,FGB,FGG,HBB,HP,IGHG1,IGHM,IGKC,LYZ,S100A8,S100A9,TF	16
Connective Tissue Disorders,Inflammatory Disease,Organismal Injury and Abnormalities,Skeletal and Muscular Disorders	Rheumatic Disease	2.48e-08		-1.558	APOA1,AZGP1,C3,CA2,FGA,FGB,FGG,HBB,HP,IGHG1,IGHM,IGKC,JUP,LYZ,S100A8,S100A9,TF	17
Cell Death and Survival	Cell survival	0.00087		-1.54	A2M,C3,CA2,CAT,DCD,HBB,IGHM,JUP,LYZ,S100A8,S100A9,TF	12
Hematological System Development and Function,Inflammatory Response,Tissue Morphology	Quantity of phagocytes	0.000975		-1.412	C3,IGHM,S100A8,S100A9,SERPINA1,TF	6
Dermatological Diseases and Conditions,Inflammatory Disease,Inflammatory Response,Organismal Injury and Abnormalities	Dermatitis	1.33e-12		-1.387	C3,CAT,DCD,DSC1,DSG1,DSP,EEF1A1,HBB,IGHG1,IGHM,IGKC,JUP,S100A8,S100A9	14
Lipid Metabolism,Small Molecule Biochemistry	Synthesis of lipid	0.00158		-1.373	A2M,APOA1,C3,CAT,EEF1A1,HBB,IGHM,SERPINA1	8
Cell-To-Cell Signaling and Interaction	Activation of cells	3.07e-07		-1.343	ANXA2,APOA1,C3,CAT,FGA,FGG,IGHG1,IGHG3,IGHM,S100A8,S100A9,SERPINA1,TF,TTR	14
Organismal Injury and Abnormalities	Fibrosis	3.12e-05		-1.342	APOA1,C3,DSP,FGG,HBB,HP,HPX,IGHG1,IGHM	9
Cellular Function and Maintenance	Endocytosis	1.31e-09		-1.307	ACTG1,APOA1,C3,HBB,HP,HPX,IGHA1,IGHM,IGKC,IGKV2-29,IGLC3,S100A9,TF	13
Cell-To-Cell Signaling and Interaction,Cellular Movement,Hematological System Development and Function,Immune Cell Trafficking	Recruitment of granulocytes	1.17e-05		-1.29	APOA1,C3,CAT,IGHG1,LYZ,S100A8	6
Cell-To-Cell Signaling and Interaction	Binding of myeloid cells	5.83e-07		-1.246	APOA1,C3,FGA,ORM1,S100A8,S100A9,SERPINA1	7
Molecular Transport,Protein Trafficking	Secretion of protein	3.42e-06		-1.192	ANXA2,FGA,FGB,FGG,GAPDH,IGHM	6
Free Radical Scavenging	Generation of reactive oxygen species	0.00161		-1.189	APOA1,CAT,HP,TF	4
Cellular Growth and Proliferation,Organismal Development	Growth of bacteria	9.56e-07		-1.184	APOA1,DCD,LYZ,ORM1,TF	5
Cardiovascular Disease,Organismal Injury and Abnormalities,Skeletal and Muscular Disorders	Myocardial infarction	1.53e-06		-1.154	APOA1,C3,CA1,CA2,FGB,FGG,TF	7
Cell Death and Survival,Skeletal and Muscular Disorders	Cell death of muscle cells	0.00152		-1.123	APOA1,CAT,DSP,EEF1A1,GAPDH	5
Cellular Compromise	Injury of cells	2.39e-05		-1.109	C3,CAT,HP,HPX	4
Cell-To-Cell Signaling and Interaction,Hematological System Development and Function,Immune Cell Trafficking	Binding of antigen presenting cells	3.75e-05		-1.091	A2M,APOA1,FGA,ORM1	4
Lipid Metabolism,Molecular Transport,Small Molecule Biochemistry	Uptake of lipid	3.85e-05		-1.067	A2M,APOA1,AZGP1,C3,TTR	5
Cellular Development,Connective Tissue Development and Function,Tissue Development	Differentiation of connective tissue cells	0.00171		-1.067	A2M,C3,CA2,IGHG1,JUP,S100A8,TF	7
Hematological System Development and Function,Inflammatory Response,Tissue Morphology	Quantity of neutrophils	0.000297		-1	C3,S100A8,S100A9,SERPINA1,TF	5
Inflammatory Response,Organismal Injury and Abnormalities	Inflammation of organ	1.87e-12		-0.956	APOA1,C3,CA1,CA2,CAT,DCD,DSC1,DSG1,DSP,EEF1A1,FGA,GAPDH,HBB,HP,HPX,IGHG1,IGHM,IGKC,JUP,S100A8,S100A9,TF	22
Cell-To-Cell Signaling and Interaction,Hematological System Development and Function,Inflammatory Response	Binding of professional phagocytic cells	1.79e-08		-0.951	A2M,APOA1,C3,FGA,ORM1,S100A8,S100A9,SERPINA1	8
Organismal Survival	Organismal death	0.000915		-0.92	ACTG1,ANXA2,APOA1,C3,DSP,FGA,FGG,HP,IGHG1,IGHM,JUP,LYZ,S100A8,S100A9,SERPINA1,TF	16
Cell-To-Cell Signaling and Interaction	Adhesion of blood cells	3.11e-08		-0.902	A2M,APOA1,C3,FGA,FGG,IGHM,ORM1,S100A8,S100A9,SERPINA1	10
Inflammatory Response	Immune response of cells	2.7e-07		-0.89	APOA1,C3,CAT,GAPDH,IGHA1,IGHG1,IGHG3,IGHM,IGKC,S100A8,S100A9	11
Cell-To-Cell Signaling and Interaction	Response of myeloid cells	0.000238		-0.862	APOA1,C3,IGHA1,IGHG3,S100A9	5
Cell-To-Cell Signaling and Interaction,Cellular Movement,Hematological System Development and Function,Immune Cell Trafficking,Inflammatory Response	Recruitment of neutrophils	0.000929		-0.849	APOA1,CAT,LYZ,S100A8	4
Cell-To-Cell Signaling and Interaction,Hematological System Development and Function,Immune Cell Trafficking,Inflammatory Response	Adhesion of neutrophils	4.56e-08		-0.823	APOA1,C3,FGA,S100A8,S100A9,SERPINA1	6
Cell-To-Cell Signaling and Interaction,Hematological System Development and Function,Immune Cell Trafficking,Inflammatory Response	Activation of leukocytes	7.88e-05		-0.789	ANXA2,APOA1,C3,FGG,IGHG1,IGHG3,IGHM,S100A8,S100A9	9
Cell-To-Cell Signaling and Interaction,Hematological System Development and Function,Immune Cell Trafficking	Adhesion of immune cells	2.1e-07		-0.682	A2M,APOA1,C3,FGA,FGG,ORM1,S100A8,S100A9,SERPINA1	9
Free Radical Scavenging	Synthesis of reactive oxygen species	4.64e-06		-0.681	ANXA2,APOA1,C3,CAT,HBB,HP,S100A8,SERPINA1,TF	9
Cell-To-Cell Signaling and Interaction,Inflammatory Response	Immune response of phagocytes	0.00179		-0.598	APOA1,C3,IGHA1,S100A9	4
Cardiovascular Disease,Cell Death and Survival,Organismal Injury and Abnormalities,Skeletal and Muscular Disorders	Apoptosis of cardiomyocytes	0.000944		-0.594	APOA1,CAT,DSP,GAPDH	4
Cellular Movement	Cell movement	3.02e-09		-0.561	A2M,ANXA2,APOA1,C3,CA2,CAT,DSP,FGA,FGB,GAPDH,HP,IGHA1,IGHG1,IGHM,IGKC,IGKV2-29,IGLC3,JUP,LYZ,ORM1,S100A7A,S100A8,S100A9,SERPINA1	24
Cellular Function and Maintenance	Engulfment of cells	0.000195		-0.514	APOA1,C3,CAT,HP,IGHG1,IGHM,S100A9	7
Cellular Movement,Hematological System Development and Function,Immune Cell Trafficking	Cellular infiltration by leukocytes	0.000112		-0.486	ANXA2,APOA1,C3,FGB,S100A8,S100A9,SERPINA1	7
Cell Death and Survival	Apoptosis	0.00028		-0.486	A2M,ANXA2,APOA1,C3,CAT,DSG1,DSP,EEF1A1,FGA,GAPDH,IGHG1,IGHM,JUP,S100A8,S100A9,SERPINA1,TF,TTR	18
Hematological System Development and Function,Tissue Morphology	Quantity of leukocytes	3.79e-05		-0.45	APOA1,C3,HBB,HPX,IGHA1,IGHM,IGKC,S100A8,S100A9,SERPINA1,TF	11
Cell Death and Survival	Cytolysis	4.4e-07		-0.415	C3,CAT,FGA,HBB,IGHG1,IGHG3,IGKC,LYZ	8
Cardiovascular System Development and Function,Cellular Development,Cellular Function and Maintenance,Cellular Growth and Proliferation,Organismal Development,Tissue Development	Proliferation of endothelial cells	0.00155		-0.371	APOA1,C3,IGHG1,S100A8,S100A9	5
Molecular Transport	Transport of molecule	4.18e-09		-0.369	A2M,ANXA2,APOA1,C3,CA1,CA2,CAT,FGA,FGB,FGG,GAPDH,HBB,HP,HPX,IGHM,JUP,S100A8,S100A9,TF,TTR	20
Cellular Function and Maintenance	Cellular homeostasis	0.000126		-0.335	A2M,ANXA2,APOA1,C3,CA2,CAT,HPX,IGHG1,IGHM,IGKC,S100A8,S100A9,SERPINA1,TF	14
Cell Death and Survival	Apoptosis of carcinoma cell lines	0.00118		-0.323	ANXA2,DSP,FGA,GAPDH,JUP	5
Cellular Movement,Hematological System Development and Function,Immune Cell Trafficking,Inflammatory Response	Cell movement of neutrophils	0.000146		-0.277	ANXA2,APOA1,C3,S100A8,S100A9,SERPINA1	6
Cell Death and Survival	Necrosis	7.93e-05		-0.24	A2M,ANXA2,APOA1,C3,CAT,DSG1,DSP,EEF1A1,FGA,GAPDH,IGHG1,IGHM,JUP,LYZ,S100A8,S100A9,SERPINA1,TF,TTR	19
Cellular Movement	Cell movement of tumor cell lines	0.000586		-0.219	A2M,ANXA2,C3,CAT,DSP,FGA,JUP,S100A8,S100A9,SERPINA1	10
Cell Signaling,Cellular Function and Maintenance,Molecular Transport,Vitamin and Mineral Metabolism	Flux of Ca2+	8.89e-05		-0.218	A2M,ANXA2,APOA1,C3,IGHM,SERPINA1	6
Cellular Function and Maintenance	Ion homeostasis of cells	0.000154		-0.218	A2M,ANXA2,APOA1,C3,CA2,IGHM,SERPINA1,TF	8
Cellular Development,Cellular Growth and Proliferation,Hematological System Development and Function,Lymphoid Tissue Structure and Development	Proliferation of immune cells	4.64e-05		-0.202	A2M,APOA1,C3,CAT,DSG1,HPX,IGHG1,IGHM,IGKC,SERPINA1	10
Inflammatory Response	Inflammation of absolute anatomical region	8.22e-05		-0.171	APOA1,C3,CA1,CA2,FGA,GAPDH,HP,HPX,IGHG1,IGHM,S100A8,TF	12
Cell-To-Cell Signaling and Interaction,Hematological System Development and Function,Inflammatory Response	Aggregation of blood platelets	8.08e-05		-0.152	C3,FGA,FGB,FGG,IGHM	5
Organismal Survival	Survival of organism	3.82e-05		-0.141	APOA1,C3,DSP,HP,IGHM,JUP,LYZ,ORM1,ORM2,S100A9	10
Cell-To-Cell Signaling and Interaction	Aggregation of cells	1.46e-05		-0.128	C3,FGA,FGB,FGG,IGHM,JUP,LYZ	7
Cellular Movement	Cellular infiltration	3.72e-06		-0.108	ANXA2,APOA1,C3,FGB,GAPDH,IGHM,S100A8,S100A9,SERPINA1	9
Cell-To-Cell Signaling and Interaction,Hematological System Development and Function	Activation of myeloid cells	0.000216		-0.063	ANXA2,C3,FGG,IGHG1,S100A8,S100A9	6
Cellular Movement	Migration of cells	1.36e-08		-0.042	A2M,ANXA2,APOA1,C3,CAT,DSP,FGA,FGB,HP,IGHA1,IGHG1,IGHM,IGKC,IGKV2-29,IGLC3,JUP,LYZ,ORM1,S100A7A,S100A8,S100A9,SERPINA1	22
Cellular Development,Cellular Growth and Proliferation,Hematological System Development and Function,Lymphoid Tissue Structure and Development	Cell proliferation of T lymphocytes	0.00113		-0.035	A2M,APOA1,C3,DSG1,HPX,IGHG1,IGHM	7
Cell-To-Cell Signaling and Interaction,Hematological System Development and Function,Immune Cell Trafficking,Inflammatory Response	Activation of phagocytes	4.03e-05		-0.034	ANXA2,APOA1,C3,FGG,IGHG1,S100A8,S100A9	7
Molecular Transport	Secretion of molecule	2.46e-07		-0.018	A2M,ANXA2,APOA1,CA2,FGA,FGB,FGG,GAPDH,IGHM,S100A8,S100A9	11
Immunological Disease	Hypersensitive reaction	8.04e-09		0	C3,CAT,DCD,EEF1A1,HBB,IGHG1,IGHM,IGKC,JUP,S100A8,S100A9	11
Cellular Movement,Hematological System Development and Function,Immune Cell Trafficking	Homing of mononuclear leukocytes	0.00161		0	APOA1,HP,IGHG1,S100A7A	4
Cell Death and Survival	Cell death of immune cells	0.00183		0	C3,CAT,GAPDH,IGHM,LYZ,S100A8,SERPINA1	7
Cardiovascular System Development and Function,Cellular Development,Cellular Function and Maintenance,Cellular Growth and Proliferation,Organismal Development,Tissue Development	Endothelial cell development	0.000417		0.025	ANXA2,APOA1,C3,IGHG1,S100A8,S100A9	6
Tissue Development	Development of epithelial tissue	0.000573		0.025	ANXA2,APOA1,C3,CA2,IGHG1,S100A8,S100A9	7
Cellular Movement,Hematological System Development and Function,Immune Cell Trafficking	Cell movement of granulocytes	5.83e-05		0.057	ANXA2,APOA1,C3,S100A7A,S100A8,S100A9,SERPINA1	7
Cell Death and Survival,Neurological Disease,Organismal Injury and Abnormalities	Apoptosis of brain cells	0.000336		0.068	A2M,CAT,GAPDH,IGHG1	4
Cellular Movement	Homing of cells	2.7e-06		0.132	A2M,ANXA2,APOA1,C3,HP,IGHG1,S100A7A,S100A8,S100A9,SERPINA1	10
Cancer,Organismal Injury and Abnormalities,Tumor Morphology	Invasion of tumor	0.000221		0.152	ANXA2,DSP,JUP,S100A8,S100A9	5
Cellular Movement,Hematological System Development and Function,Immune Cell Trafficking	Cell movement of mononuclear leukocytes	0.00178		0.168	ANXA2,APOA1,C3,HP,IGHG1,S100A7A	6
Cell-To-Cell Signaling and Interaction,Cellular Function and Maintenance,Inflammatory Response	Phagocytosis of cells	0.000996		0.227	APOA1,C3,CAT,IGHG1,S100A9	5
Cancer,Cell Death and Survival,Organismal Injury and Abnormalities,Tumor Morphology	Cell death of tumor cells	0.00101		0.232	ANXA2,CAT,EEF1A1,IGHG1,IGHM,TF	6
Cellular Movement	Migration of tumor cell lines	0.000703		0.24	A2M,ANXA2,CAT,DSP,FGA,JUP,S100A8,S100A9,SERPINA1	9
Cellular Movement,Immune Cell Trafficking	Leukocyte migration	4.41e-10		0.265	ANXA2,APOA1,C3,CAT,FGB,HP,IGHA1,IGHG1,IGHM,IGKC,IGKV2-29,IGLC3,LYZ,S100A7A,S100A8,S100A9,SERPINA1	17
Protein Trafficking	Interaction of protein	5.62e-06		0.283	A2M,ANXA2,CAT,FGA,FGB,GAPDH,TF	7
Cellular Development,Cellular Growth and Proliferation,Hematological System Development and Function,Lymphoid Tissue Structure and Development	Proliferation of lymphocytes	0.000164		0.302	A2M,APOA1,C3,DSG1,HPX,IGHG1,IGHM,IGKC,SERPINA1	9
Carbohydrate Metabolism	Uptake of monosaccharide	0.000583		0.317	A2M,APOA1,C3,CAT,JUP	5
Cardiovascular System Development and Function	Development of vasculature	6.54e-06		0.345	ANXA2,APOA1,C3,CAT,FGA,HP,IGHG1,IGHM,JUP,ORM1,S100A8,S100A9,TF	13
Cellular Movement,Hematological System Development and Function,Immune Cell Trafficking,Inflammatory Response	Cell movement of phagocytes	0.000164		0.369	ANXA2,APOA1,C3,HP,S100A7A,S100A8,S100A9,SERPINA1	8
Cellular Movement	Cell movement of myeloid cells	0.000151		0.415	ANXA2,APOA1,C3,HP,S100A7A,S100A8,S100A9,SERPINA1	8
Cellular Movement	Chemotaxis	1.36e-05		0.418	A2M,ANXA2,APOA1,C3,HP,S100A7A,S100A8,S100A9,SERPINA1	9
Gastrointestinal Disease,Inflammatory Response	Inflammation of gastrointestinal tract	3.31e-05		0.422	C3,CA2,FGA,IGHG1,IGHM,IGKC,S100A8,TF	8
Cellular Movement,Hematological System Development and Function,Immune Cell Trafficking	Homing of leukocytes	5.13e-06		0.463	APOA1,C3,HP,IGHG1,S100A7A,S100A8,S100A9,SERPINA1	8
Cellular Movement,Hematological System Development and Function,Immune Cell Trafficking	Cell movement of leukocytes	6.66e-05		0.478	ANXA2,APOA1,C3,FGB,HP,IGHG1,S100A7A,S100A8,S100A9,SERPINA1	10
Infectious Diseases	Viral Infection	1.45e-05		0.495	ANXA2,APOA1,C3,CA2,CAT,DCD,EEF1A1,FGA,GAPDH,HP,IGHM,IGKC,S100A8,S100A9,SERPINA1	15
Cancer,Cell Death and Survival,Organismal Injury and Abnormalities,Tumor Morphology	Necrosis of tumor	0.000166		0.547	ANXA2,CAT,EEF1A1,FGA,IGHG1,IGHM,TF	7
Hematological System Development and Function,Immune Cell Trafficking,Inflammatory Response,Tissue Development	Accumulation of phagocytes	1.14e-06		0.577	APOA1,C3,DSC1,IGHG1,S100A8,S100A9	6
Hematological System Development and Function,Tissue Development	Accumulation of myeloid cells	4.08e-06		0.588	APOA1,C3,DSC1,IGHG1,S100A8,S100A9	6
Cardiovascular System Development and Function,Organismal Development	Angiogenesis	5.85e-05		0.611	ANXA2,APOA1,C3,CAT,HP,IGHG1,JUP,ORM1,S100A8,S100A9,TF	11
Cellular Movement	Invasion of cells	0.000592		0.62	A2M,ANXA2,AZGP1,CAT,DSP,IGHG1,JUP,S100A8,S100A9,SERPINA1	10
Cell Death and Survival,Neurological Disease,Organismal Injury and Abnormalities	Cell death of brain cells	0.000555		0.689	A2M,CAT,GAPDH,IGHG1,TF	5
Cardiovascular System Development and Function,Organismal Development	Vasculogenesis	0.000276		0.713	ANXA2,APOA1,C3,CAT,IGHG1,ORM1,S100A8,S100A9,TF	9
Cellular Movement,Hematological System Development and Function,Immune Cell Trafficking,Inflammatory Response	Chemotaxis of phagocytes	9.22e-06		0.721	APOA1,C3,HP,S100A7A,S100A8,S100A9,SERPINA1	7
Inflammatory Response	Inflammation of body cavity	0.000339		0.747	APOA1,C3,FGA,GAPDH,HP,HPX,IGHG1,IGHM,S100A8,TF	10
Cell Death and Survival	Apoptosis of tumor cell lines	4.21e-05		0.79	ANXA2,CAT,DSG1,DSP,EEF1A1,FGA,GAPDH,IGHG1,IGHM,JUP,S100A8,S100A9,TF	13
Cellular Movement	Chemotaxis of myeloid cells	7.23e-06		0.802	APOA1,C3,HP,S100A7A,S100A8,S100A9,SERPINA1	7
Cellular Movement,Hematological System Development and Function,Immune Cell Trafficking,Inflammatory Response	Chemotaxis of neutrophils	3.43e-05		0.931	APOA1,C3,S100A8,S100A9,SERPINA1	5
Cellular Movement,Hematological System Development and Function,Immune Cell Trafficking,Inflammatory Response	Cell movement of monocytes	0.00074		1.067	ANXA2,APOA1,HP,S100A7A	4
Cell-To-Cell Signaling and Interaction,Hematological System Development and Function,Immune Cell Trafficking,Inflammatory Response	Activation of antigen presenting cells	1.31e-05		1.091	ANXA2,APOA1,C3,FGG,IGHG1,IGHM,S100A9	7
Cellular Movement,Hematological System Development and Function,Immune Cell Trafficking,Inflammatory Response	Chemotaxis of granulocytes	4.84e-06		1.122	APOA1,C3,S100A7A,S100A8,S100A9,SERPINA1	6
Organismal Injury and Abnormalities	Bleeding	1.57e-06		1.221	ANXA2,C3,FGA,FGB,FGG,JUP,S100A9,SERPINA1,TF	9
Cellular Movement,Hematological System Development and Function,Immune Cell Trafficking,Inflammatory Response	Migration of phagocytes	0.000722		1.287	ANXA2,APOA1,C3,S100A8,S100A9	5
Inflammatory Response	Inflammatory response	1.83e-07		1.331	ANXA2,APOA1,C3,FGG,HP,IGHG1,IGHM,LYZ,ORM1,S100A7A,S100A8,S100A9,SERPINA1	13
Lipid Metabolism,Molecular Transport,Small Molecule Biochemistry	Concentration of lipid	0.000374		1.446	APOA1,AZGP1,C3,EEF1A1,HP,S100A8,S100A9,SERPINA1,TTR	9
Cell Signaling,Molecular Transport,Vitamin and Mineral Metabolism	Quantity of Ca2+	4.8e-08		1.72	A2M,ANXA2,C3,IGHM,IGKC,LYZ,ORM1,S100A8,S100A9,TTR	10
Molecular Transport	Quantity of metal	2.4e-10		1.837	A2M,ANXA2,C3,HP,HPX,IGHM,IGKC,LYZ,ORM1,S100A8,S100A9,TF,TTR	13

## Sheet: upstream_NR
Upstream Regulator	Expr Fold Change	Molecule Type	Predicted Activation State	Activation z-score	p-value of overlap	Target Molecules in Dataset	Mechanistic Network
SRF		transcription regulator		-1.982	0.000407	A2M,ACTG1,IGHM,S100A8,S100A9	9 (2)
GW 4064		chemical toxicant		-1.961	3.74e-06	APOA1,FGA,FGB,FGG
chenodeoxycholic acid		chemical - endogenous mammalian		-1.961	1.89e-05	APOA1,FGA,FGB,FGG
Stat3-Stat3		complex		-1.949	3.28e-07	A2M,FGA,FGB,FGG
vancomycin		biologic drug		-1.633	1.2e-08	A2M,ANXA2,C3,CAT,FGA,FGB
cyclosporin A		biologic drug		-1.633	0.000153	A2M,ANXA2,FGA,FGB,HPX,S100A9
indomethacin		chemical drug		-1.4	7.82e-05	A2M,ANXA2,FGA,FGB,S100A8
methotrexate		chemical drug		-1.342	4.97e-06	ACTG1,C3,FGA,GAPDH,ORM1,TTR
EZH2		transcription regulator		-1.342	0.000682	C3,CA2,S100A8,S100A9,SERPINA1
doxorubicin		chemical drug		-1.298	1.31e-05	A2M,ANXA2,CA2,CAT,EEF1A1,FGA,FGB
FOS		transcription regulator		-1.131	6.5e-06	A2M,ACTG1,C3,CA2,CAT,FGA,S100A8,S100A9
cycloheximide		chemical reagent		-1.131	0.00481	APOA1,CAT,EEF1A1,S100A8	11 (4)
ESR1		ligand-dependent nuclear receptor		-1.124	0.0371	APOA1,C3,CA2,HPX,S100A9,TTR
calcitriol		chemical drug		-1.118	5.53e-08	ANXA2,APOA1,C3,CA2,FGG,GAPDH,S100A8,S100A9,SERPINA1,TF
phenacetin		chemical drug		-1.067	1.01e-06	A2M,ANXA2,FGA,FGB
RXRA		ligand-dependent nuclear receptor		-1.067	1.61e-05	APOA1,C3,CAT,FGG,LYZ,S100A8	17 (3)
4-methylnitrosoamino-1-(3-pyridinyl)-1-butanone		chemical toxicant		-1	7.44e-07	APOA1,HP,SERPINA1,TF
hexachlorobenzene		chemical toxicant		-1	3.49e-06	A2M,ANXA2,FGA,FGB
gentamicin C		chemical drug		-1	5.56e-06	A2M,ANXA2,FGA,FGB
lomustine		chemical drug		-1	5.56e-06	A2M,ANXA2,FGA,FGB
triamterene		chemical drug		-1	6.29e-06	A2M,ANXA2,FGA,FGB
benzo(a)pyrene		chemical toxicant		-1	0.000701	APOA1,HP,SERPINA1,TF
E. coli B5 lipopolysaccharide		chemical - endogenous non-mammalian		-1	0.00128	APOA1,CAT,EEF1A1,TTR
STAT3		transcription regulator		-0.984	8.65e-08	A2M,CAT,FGA,FGB,FGG,HBB,HP,LYZ,S100A9,SERPINA1	20 (5)
IL6		cytokine		-0.93	2.97e-12	A2M,APOA1,C3,FGA,FGB,FGG,HP,HPX,IGHM,LYZ,ORM1,S100A9,SERPINA1,TF,TTR	25 (10)
fenamic acid		chemical reagent		-0.762	7.51e-06	A2M,ANXA2,FGA,FGB
methapyrilene		chemical drug		-0.707	1.37e-10	A2M,ACTG1,ANXA2,CAT,EEF1A1,FGA,ORM1,TTR
tamoxifen		chemical drug		-0.6	0.000173	C3,CA2,CAT,GAPDH,ORM1	12 (3)
tretinoin		chemical - endogenous mammalian		-0.581	4.85e-07	A2M,ANXA2,C3,CA2,DSC1,DSG1,DSP,EEF1A1,FGG,HPX,IGHM,S100A8,S100A9,TF
lipopolysaccharide		chemical drug		-0.488	8.67e-07	APOA1,AZGP1,C3,FGB,HP,IGHG1,IGHM,IGKC,LYZ,ORM1,ORM2,S100A8,S100A9,SERPINA1,TF	22 (3)
L-triiodothyronine		chemical - endogenous mammalian		-0.467	1.47e-06	A2M,APOA1,CA1,FGA,HP,IGHM,LYZ,TF	18 (4)
allopurinol		chemical drug		-0.447	8.41e-07	A2M,ANXA2,CAT,FGA,FGB
acetaminophen		chemical drug		-0.447	9.4e-07	A2M,ACTG1,CAT,ORM1,TF,TTR
cisplatin		chemical drug		-0.391	0.00287	A2M,ANXA2,CAT,FGA,FGB,LYZ	11 (2)
puromycin aminonucleoside		chemical reagent		-0.378	7.18e-10	A2M,ACTG1,ANXA2,CAT,FGA,FGB,TTR
IFNG		cytokine		-0.36	0.000198	A2M,AZGP1,C3,CAT,EEF1A1,FGG,IGHG1,S100A8,S100A9,SERPINA1	23 (7)
methylprednisolone		chemical drug		-0.339	0.00275	A2M,ANXA2,DSG1,JUP,SERPINA1
IL4		cytokine		-0.319	1.32e-07	ACTG1,ANXA2,C3,CA2,CAT,DSC1,DSG1,IGHG1,IGHG2,IGHG3,S100A8,S100A9
IL1B		cytokine		-0.287	4.16e-05	A2M,C3,CAT,FGB,FGG,HP,ORM1,S100A8,S100A9	25 (10)
TNF		cytokine		-0.134	2.75e-06	A2M,APOA1,C3,CA2,CAT,DCD,FGG,HP,IGKC,JUP,ORM1,S100A8,S100A9,TF	24 (6)
OSM		cytokine		-0.072	5.16e-07	A2M,ANXA2,CAT,FGA,FGB,HP,S100A8,S100A9,SERPINA1	15 (3)
Immunoglobulin		complex		-0.061	0.0174	DSP,JUP,S100A8,S100A9
CEBPB		transcription regulator		0	8.44e-07	C3,HBB,HP,HPX,IGKC,ORM1,SERPINA1,TF
HNF1A		transcription regulator		0	0.000229	DSC1,FGA,FGB,HPX,SERPINA1,TTR	7 (2)
AGN194204		chemical drug		0	0.000749	ANXA2,CA2,GAPDH,IGHM
actinomycin D		biologic drug		0	0.000937	APOA1,FGB,GAPDH,TF
TP73		transcription regulator		0	0.00629	C3,LYZ,SERPINA1,TTR
PRDM1		transcription regulator		0.053	7.44e-09	FGA,FGB,FGG,IGHG1,IGHM,S100A8,S100A9,TTR
IL5		cytokine		0.068	0.00186	A2M,ANXA2,IGHG1,IGHM
IGF1		growth factor		0.068	0.0115	A2M,GAPDH,HBB,TF
IL1		group		0.08	0.000391	C3,HP,LYZ,ORM1,S100A9	17 (3)
genistein		chemical drug		0.147	0.00619	A2M,APOA1,C3,CAT	7 (2)
FOXA2		transcription regulator		0.152	5.25e-09	A2M,APOA1,C3,FGB,LYZ,SERPINA1,TF,TTR	17 (3)
TGFB1		growth factor		0.156	0.000324	ANXA2,C3,CAT,DSP,EEF1A1,FGA,FGB,FGG,IGHM,JUP,SERPINA1
ethanol		chemical - endogenous mammalian		0.156	0.000659	APOA1,CAT,IGHM,ORM1,SERPINA1
nitrofurantoin		chemical drug		0.181	1.09e-16	A2M,ACTG1,ANXA2,C3,CAT,EEF1A1,FGA,FGB,HPX,ORM1,SERPINA1,TTR
TP53		transcription regulator		0.221	0.00683	A2M,ANXA2,APOA1,CAT,EEF1A1,GAPDH,LYZ,ORM1,ORM2
MYD88		other		0.339	0.00143	C3,HP,IGHG1,S100A8
NFKBIA		transcription regulator		0.364	0.000137	A2M,APOA1,AZGP1,C3,S100A8,S100A9
dexamethasone		chemical drug		0.377	8.67e-10	ACTG1,APOA1,C3,CA2,CAT,EEF1A1,FGA,FGB,FGG,GAPDH,HP,IGHM,IGKC,ORM1,S100A8,S100A9,SERPINA1,TF,TTR	25 (6)
IL22		cytokine		0.463	1.14e-07	C3,FGA,HP,S100A7A,S100A8,S100A9	9 (3)
pirinixic acid		chemical toxicant		0.474	1.17e-06	ANXA2,APOA1,C3,CAT,FGB,GAPDH,HPX,ORM1	17 (4)
beta-estradiol		chemical - endogenous mammalian		0.561	0.000859	A2M,APOA1,C3,CA2,DSP,FGB,HBB,LYZ,SERPINA1,TF,TTR	19 (4)
IL1A		cytokine		0.647	4.63e-06	C3,CA2,ORM1,S100A8,S100A9,SERPINA1
carbon tetrachloride		chemical toxicant		0.784	0.000643	APOA1,CAT,FGG,TF
tetradecanoylphorbol acetate		chemical drug		0.834	0.000242	C3,CA2,CAT,DCD,DSG1,LYZ,S100A8,S100A9,SERPINA1	15 (5)
D-glucose		chemical - endogenous mammalian		0.853	0.00664	C3,CAT,GAPDH,HP,S100A8	20 (7)
PML		transcription regulator		0.896	5.13e-07	ACTG1,APOA1,CAT,HBB,JUP,LYZ
IL17A		cytokine		0.919	0.00121	C3,S100A7A,S100A8,S100A9	7 (2)
forskolin		chemical toxicant		0.927	0.0422	APOA1,HP,ORM1,S100A8
Ins1		other		0.934	0.00248	APOA1,GAPDH,HP,TF	5 (2)
EGF		growth factor		0.994	0.00247	APOA1,EEF1A1,S100A9,SERPINA1,TF
IL23A		cytokine		1	3.73e-07	HP,HPX,S100A8,S100A9
U0126		chemical - kinase inhibitor		1.091	0.00038	C3,EEF1A1,IGHA1,IGHM,S100A9,TF
LEP		growth factor		1.131	0.00939	APOA1,GAPDH,HPX,ORM1
CEBPA		transcription regulator		1.195	1.29e-06	A2M,C3,CA2,GAPDH,HBD,HP,S100A8,S100A9	11 (2)
PD98059		chemical - kinase inhibitor		1.238	7.02e-06	APOA1,C3,CA2,DSG1,EEF1A1,S100A8,SERPINA1,TF	14 (3)
ciprofibrate		chemical drug		1.498	6.64e-06	ANXA2,CAT,FGA,FGB,SERPINA1
HNF4A		transcription regulator		1.617	7.52e-05	APOA1,C3,CAT,FGA,FGB,GAPDH,HPX,ORM1,ORM2,S100A9,SERPINA1,TF,TTR
rosiglitazone		chemical drug		1.633	2.11e-05	C3,CAT,FGB,GAPDH,HP,S100A8,S100A9	23 (10)
PPARG		ligand-dependent nuclear receptor		1.722	2.51e-06	APOA1,C3,CA2,CAT,GAPDH,HP,S100A8,SERPINA1	17 (6)
XBP1		transcription regulator		1.914	0.000813	APOA1,CAT,SERPINA1,TTR
hydrogen peroxide		chemical - endogenous mammalian		1.955	0.0138	ANXA2,CAT,DCD,EEF1A1
ROCK2		kinase		1.982	2.22e-06	DSC1,DSG1,DSP,S100A8
CASR		G-protein coupled receptor	Activated	2	0.000112	DSG1,S100A8,S100A9,SERPINA1
PPARA		ligand-dependent nuclear receptor	Activated	2.218	7.49e-09	ANXA2,APOA1,C3,CAT,FGA,FGB,FGG,HPX,S100A8,S100A9	20 (5)
VDR		transcription regulator	Activated	2.236	6.95e-05	DSG1,FGG,S100A8,S100A9,SERPINA1
fenofibrate		chemical drug	Activated	2.414	4.83e-07	APOA1,CAT,FGA,FGB,FGG,GAPDH,HP	20 (5)
