# Supplementary material for: Phenotypic and Proteomic Analysis Identifies Hallmarks of Blood Circulating Extracellular Vesicles in NSCLC Responders to Immune Checkpoint Inhibitors
Source: Cancers (Basel). 2021 Feb 3;13(4):585. doi: 10.3390/cancers13040585 (PMC7913165; doi:10.3390/cancers13040585)
Supplement: Supplementary file 1 [file cancers-13-00585-s001.zip › Supplementary Table 12_List of Enriched Gene Ontology (GO) Pathways.xlsx]

## Sheet: Figure 5B
#term ID	term description	observed gene count	background gene count	false discovery rate	matching proteins in your network (IDs)	matching proteins in your network (labels)
GO:0016192	vesicle-mediated transport	8	1699	2.27e-05	ENSP00000236850,ENSP00000245907,ENSP00000306361,ENSP00000322421,ENSP00000369129,ENSP00000385834,ENSP00000416066,ENSP00000458162	ACTG1,APOA1,C3,DSP,FGA,HBA1,SERPINA1,TF
GO:0045055	regulated exocytosis	6	691	6.35e-05	ENSP00000236850,ENSP00000245907,ENSP00000306361,ENSP00000369129,ENSP00000385834,ENSP00000416066	APOA1,C3,DSP,FGA,SERPINA1,TF
GO:0002576	platelet degranulation	4	129	6.92e-05	ENSP00000236850,ENSP00000306361,ENSP00000385834,ENSP00000416066	APOA1,FGA,SERPINA1,TF
GO:0043687	post-translational protein modification	5	365	6.92e-05	ENSP00000236850,ENSP00000245907,ENSP00000306361,ENSP00000385834,ENSP00000416066	APOA1,C3,FGA,SERPINA1,TF
GO:0006897	endocytosis	4	510	0.0038	ENSP00000236850,ENSP00000245907,ENSP00000322421,ENSP00000458162	ACTG1,APOA1,C3,HBA1
GO:0010035	response to inorganic substance	4	491	0.0038	ENSP00000306361,ENSP00000322421,ENSP00000385834,ENSP00000458162	ACTG1,FGA,HBA1,TF
GO:0034114	regulation of heterotypic cell-cell adhesion	2	21	0.0038	ENSP00000236850,ENSP00000306361	APOA1,FGA
GO:0009611	response to wounding	4	547	0.0045	ENSP00000236850,ENSP00000306361,ENSP00000369129,ENSP00000416066	APOA1,DSP,FGA,SERPINA1
GO:0006950	response to stress	7	3267	0.0057	ENSP00000236850,ENSP00000245907,ENSP00000306361,ENSP00000322421,ENSP00000369129,ENSP00000416066,ENSP00000458162	ACTG1,APOA1,C3,DSP,FGA,HBA1,SERPINA1
GO:0090207	regulation of triglyceride metabolic process	2	34	0.0058	ENSP00000236850,ENSP00000245907	APOA1,C3
GO:1900026	positive regulation of substrate adhesion-dependent cell spreading	2	32	0.0058	ENSP00000236850,ENSP00000306361	APOA1,FGA
GO:0034109	homotypic cell-cell adhesion	2	38	0.0067	ENSP00000306361,ENSP00000369129	DSP,FGA
GO:0016043	cellular component organization	8	5163	0.0071	ENSP00000236850,ENSP00000245907,ENSP00000306361,ENSP00000322421,ENSP00000369129,ENSP00000385834,ENSP00000416066,ENSP00000458162	ACTG1,APOA1,C3,DSP,FGA,HBA1,SERPINA1,TF
GO:0061024	membrane organization	4	729	0.0084	ENSP00000245907,ENSP00000385834,ENSP00000416066,ENSP00000458162	ACTG1,C3,SERPINA1,TF
GO:2000257	regulation of protein activation cascade	2	54	0.0099	ENSP00000245907,ENSP00000306361	C3,FGA
GO:0006955	immune response	5	1560	0.0103	ENSP00000245907,ENSP00000306361,ENSP00000369129,ENSP00000416066,ENSP00000458162	ACTG1,C3,DSP,FGA,SERPINA1
GO:0010038	response to metal ion	3	339	0.0131	ENSP00000306361,ENSP00000385834,ENSP00000458162	ACTG1,FGA,TF
GO:0050776	regulation of immune response	4	873	0.0131	ENSP00000236850,ENSP00000245907,ENSP00000306361,ENSP00000458162	ACTG1,APOA1,C3,FGA
GO:0002252	immune effector process	4	927	0.0156	ENSP00000245907,ENSP00000369129,ENSP00000416066,ENSP00000458162	ACTG1,C3,DSP,SERPINA1
GO:0072376	protein activation cascade	2	74	0.0156	ENSP00000245907,ENSP00000306361	C3,FGA
GO:0002253	activation of immune response	3	393	0.0174	ENSP00000245907,ENSP00000306361,ENSP00000458162	ACTG1,C3,FGA
GO:0006464	cellular protein modification process	6	2999	0.0192	ENSP00000236850,ENSP00000245907,ENSP00000306361,ENSP00000369129,ENSP00000385834,ENSP00000416066	APOA1,C3,DSP,FGA,SERPINA1,TF
GO:0001775	cell activation	4	1024	0.0194	ENSP00000245907,ENSP00000306361,ENSP00000369129,ENSP00000416066	C3,DSP,FGA,SERPINA1
GO:0051346	negative regulation of hydrolase activity	3	438	0.021	ENSP00000236850,ENSP00000245907,ENSP00000416066	APOA1,C3,SERPINA1
GO:0042060	wound healing	3	461	0.0237	ENSP00000306361,ENSP00000369129,ENSP00000416066	DSP,FGA,SERPINA1
GO:0043312	neutrophil degranulation	3	485	0.0249	ENSP00000245907,ENSP00000369129,ENSP00000416066	C3,DSP,SERPINA1
GO:0044057	regulation of system process	3	516	0.0249	ENSP00000236850,ENSP00000306361,ENSP00000369129	APOA1,DSP,FGA
GO:0051130	positive regulation of cellular component organization	4	1128	0.0249	ENSP00000236850,ENSP00000245907,ENSP00000306361,ENSP00000385834	APOA1,C3,FGA,TF
GO:0060627	regulation of vesicle-mediated transport	3	480	0.0249	ENSP00000245907,ENSP00000306361,ENSP00000385834	C3,FGA,TF
GO:0006952	defense response	4	1234	0.0263	ENSP00000245907,ENSP00000306361,ENSP00000416066,ENSP00000458162	ACTG1,C3,FGA,SERPINA1
GO:0045807	positive regulation of endocytosis	2	129	0.0263	ENSP00000245907,ENSP00000385834	C3,TF
GO:0051592	response to calcium ion	2	129	0.0263	ENSP00000306361,ENSP00000458162	ACTG1,FGA
GO:1905952	regulation of lipid localization	2	129	0.0263	ENSP00000236850,ENSP00000245907	APOA1,C3
GO:0065008	regulation of biological quality	6	3559	0.0283	ENSP00000236850,ENSP00000245907,ENSP00000306361,ENSP00000369129,ENSP00000385834,ENSP00000416066	APOA1,C3,DSP,FGA,SERPINA1,TF
GO:0022607	cellular component assembly	5	2343	0.0294	ENSP00000236850,ENSP00000306361,ENSP00000322421,ENSP00000416066,ENSP00000458162	ACTG1,APOA1,FGA,HBA1,SERPINA1
GO:0046890	regulation of lipid biosynthetic process	2	174	0.036	ENSP00000236850,ENSP00000245907	APOA1,C3
GO:0032879	regulation of localization	5	2524	0.0367	ENSP00000236850,ENSP00000245907,ENSP00000306361,ENSP00000369129,ENSP00000385834	APOA1,C3,DSP,FGA,TF
GO:0031347	regulation of defense response	3	676	0.0375	ENSP00000236850,ENSP00000245907,ENSP00000306361	APOA1,C3,FGA
GO:0045087	innate immune response	3	676	0.0375	ENSP00000245907,ENSP00000306361,ENSP00000458162	ACTG1,C3,FGA
GO:0006909	phagocytosis	2	185	0.0376	ENSP00000245907,ENSP00000458162	ACTG1,C3
GO:0065003	protein-containing complex assembly	4	1514	0.0386	ENSP00000236850,ENSP00000306361,ENSP00000322421,ENSP00000416066	APOA1,FGA,HBA1,SERPINA1
GO:0034330	cell junction organization	2	197	0.0407	ENSP00000369129,ENSP00000458162	ACTG1,DSP
GO:0032101	regulation of response to external stimulus	3	732	0.0425	ENSP00000236850,ENSP00000245907,ENSP00000306361	APOA1,C3,FGA
GO:0050896	response to stimulus	8	7824	0.0426	ENSP00000236850,ENSP00000245907,ENSP00000306361,ENSP00000322421,ENSP00000369129,ENSP00000385834,ENSP00000416066,ENSP00000458162	ACTG1,APOA1,C3,DSP,FGA,HBA1,SERPINA1,TF
GO:0006898	receptor-mediated endocytosis	2	209	0.0438	ENSP00000236850,ENSP00000322421	APOA1,HBA1

## Sheet: Figure 5C
#term ID	term description	observed gene count	background gene count	false discovery rate	matching proteins in your network (IDs)	matching proteins in your network (labels)
GO:0045055	regulated exocytosis	9	691	1.39e-08	ENSP00000257192,ENSP00000259396,ENSP00000306099,ENSP00000323929,ENSP00000333994,ENSP00000336829,ENSP00000339063,ENSP00000348170,ENSP00000357722	A2M,DSG1,EEF1A1,FGB,FGG,HBB,HP,ORM1,S100A8
GO:0001775	cell activation	8	1024	3.6e-06	ENSP00000257192,ENSP00000259396,ENSP00000306099,ENSP00000333994,ENSP00000336829,ENSP00000339063,ENSP00000348170,ENSP00000357722	DSG1,EEF1A1,FGB,FGG,HBB,HP,ORM1,S100A8
GO:0006955	immune response	9	1560	3.6e-06	ENSP00000229239,ENSP00000257192,ENSP00000259396,ENSP00000306099,ENSP00000333994,ENSP00000339063,ENSP00000348170,ENSP00000357722,ENSP00000406773	DCD,DSG1,EEF1A1,FGB,GAPDH,HBB,HP,ORM1,S100A8
GO:0002376	immune system process	10	2370	3.97e-06	ENSP00000229239,ENSP00000257192,ENSP00000259396,ENSP00000306099,ENSP00000333994,ENSP00000336829,ENSP00000339063,ENSP00000348170,ENSP00000357722,ENSP00000406773	DCD,DSG1,EEF1A1,FGB,FGG,GAPDH,HBB,HP,ORM1,S100A8
GO:0002793	positive regulation of peptide secretion	5	262	1.67e-05	ENSP00000229239,ENSP00000259396,ENSP00000306099,ENSP00000336829,ENSP00000357722	FGB,FGG,GAPDH,ORM1,S100A8
GO:0043312	neutrophil degranulation	6	485	1.67e-05	ENSP00000257192,ENSP00000259396,ENSP00000333994,ENSP00000339063,ENSP00000348170,ENSP00000357722	DSG1,EEF1A1,HBB,HP,ORM1,S100A8
GO:0072378	blood coagulation, fibrin clot formation	3	27	2.86e-05	ENSP00000306099,ENSP00000323929,ENSP00000336829	A2M,FGB,FGG
GO:0002576	platelet degranulation	4	129	3.22e-05	ENSP00000259396,ENSP00000306099,ENSP00000323929,ENSP00000336829	A2M,FGB,FGG,ORM1
GO:0019730	antimicrobial humoral response	4	143	4.61e-05	ENSP00000229239,ENSP00000306099,ENSP00000357722,ENSP00000406773	DCD,FGB,GAPDH,S100A8
GO:0050832	defense response to fungus	3	49	0.00011	ENSP00000229239,ENSP00000357722,ENSP00000406773	DCD,GAPDH,S100A8
GO:0098542	defense response to other organism	5	438	0.00011	ENSP00000229239,ENSP00000306099,ENSP00000348170,ENSP00000357722,ENSP00000406773	DCD,FGB,GAPDH,HP,S100A8
GO:0042060	wound healing	5	461	0.00014	ENSP00000306099,ENSP00000323929,ENSP00000333994,ENSP00000336829,ENSP00000357722	A2M,FGB,FGG,HBB,S100A8
GO:0010035	response to inorganic substance	5	491	0.00017	ENSP00000306099,ENSP00000333994,ENSP00000336829,ENSP00000348170,ENSP00000357722	FGB,FGG,HBB,HP,S100A8
GO:0018119	peptidyl-cysteine S-nitrosylation	2	6	0.00022	ENSP00000229239,ENSP00000357722	GAPDH,S100A8
GO:0050714	positive regulation of protein secretion	4	240	0.00023	ENSP00000229239,ENSP00000259396,ENSP00000306099,ENSP00000336829	FGB,FGG,GAPDH,ORM1
GO:0002526	acute inflammatory response	3	73	0.00024	ENSP00000259396,ENSP00000348170,ENSP00000357722	HP,ORM1,S100A8
GO:0006950	response to stress	9	3267	0.00025	ENSP00000229239,ENSP00000259396,ENSP00000306099,ENSP00000323929,ENSP00000333994,ENSP00000336829,ENSP00000348170,ENSP00000357722,ENSP00000406773	A2M,DCD,FGB,FGG,GAPDH,HBB,HP,ORM1,S100A8
GO:0042742	defense response to bacterium	4	250	0.00025	ENSP00000306099,ENSP00000348170,ENSP00000357722,ENSP00000406773	DCD,FGB,HP,S100A8
GO:0002224	toll-like receptor signaling pathway	3	87	0.00036	ENSP00000306099,ENSP00000336829,ENSP00000357722	FGB,FGG,S100A8
GO:0007596	blood coagulation	4	288	0.00038	ENSP00000306099,ENSP00000323929,ENSP00000333994,ENSP00000336829	A2M,FGB,FGG,HBB
GO:0031639	plasminogen activation	2	11	0.00044	ENSP00000306099,ENSP00000336829	FGB,FGG
GO:0034116	positive regulation of heterotypic cell-cell adhesion	2	13	0.00056	ENSP00000306099,ENSP00000336829	FGB,FGG
GO:0006952	defense response	6	1234	0.00065	ENSP00000229239,ENSP00000259396,ENSP00000306099,ENSP00000348170,ENSP00000357722,ENSP00000406773	DCD,FGB,GAPDH,HP,ORM1,S100A8
GO:0045088	regulation of innate immune response	4	361	0.00076	ENSP00000306099,ENSP00000323929,ENSP00000336829,ENSP00000357722	A2M,FGB,FGG,S100A8
GO:0050880	regulation of blood vessel size	3	137	0.001	ENSP00000306099,ENSP00000333994,ENSP00000336829	FGB,FGG,HBB
GO:0042730	fibrinolysis	2	21	0.0011	ENSP00000306099,ENSP00000336829	FGB,FGG
GO:0098609	cell-cell adhesion	4	416	0.0011	ENSP00000257192,ENSP00000306099,ENSP00000336829,ENSP00000357722	DSG1,FGB,FGG,S100A8
GO:0070527	platelet aggregation	2	25	0.0014	ENSP00000306099,ENSP00000336829	FGB,FGG
GO:2000352	negative regulation of endothelial cell apoptotic process	2	28	0.0016	ENSP00000306099,ENSP00000336829	FGB,FGG
GO:1900026	positive regulation of substrate adhesion-dependent cell spreading	2	32	0.0019	ENSP00000306099,ENSP00000336829	FGB,FGG
GO:0010941	regulation of cell death	6	1638	0.002	ENSP00000229239,ENSP00000306099,ENSP00000333994,ENSP00000336829,ENSP00000348170,ENSP00000357722	FGB,FGG,GAPDH,HBB,HP,S100A8
GO:0045907	positive regulation of vasoconstriction	2	33	0.002	ENSP00000306099,ENSP00000336829	FGB,FGG
GO:1902042	negative regulation of extrinsic apoptotic signaling pathway via death domain receptors	2	36	0.0023	ENSP00000306099,ENSP00000336829	FGB,FGG
GO:0050896	response to stimulus	11	7824	0.0029	ENSP00000229239,ENSP00000257192,ENSP00000259396,ENSP00000306099,ENSP00000323929,ENSP00000333994,ENSP00000336829,ENSP00000339063,ENSP00000348170,ENSP00000357722,ENSP00000406773	A2M,DCD,DSG1,EEF1A1,FGB,FGG,GAPDH,HBB,HP,ORM1,S100A8
GO:0006953	acute-phase response	2	45	0.0033	ENSP00000259396,ENSP00000348170	HP,ORM1
GO:0070887	cellular response to chemical stimulus	7	2672	0.0033	ENSP00000229239,ENSP00000306099,ENSP00000333994,ENSP00000336829,ENSP00000339063,ENSP00000348170,ENSP00000357722	EEF1A1,FGB,FGG,GAPDH,HBB,HP,S100A8
GO:0010942	positive regulation of cell death	4	663	0.0043	ENSP00000229239,ENSP00000333994,ENSP00000348170,ENSP00000357722	GAPDH,HBB,HP,S100A8
GO:0030198	extracellular matrix organization	3	296	0.0053	ENSP00000306099,ENSP00000323929,ENSP00000336829	A2M,FGB,FGG
GO:0032101	regulation of response to external stimulus	4	732	0.0057	ENSP00000306099,ENSP00000323929,ENSP00000336829,ENSP00000357722	A2M,FGB,FGG,S100A8
GO:0046677	response to antibiotic	3	305	0.0057	ENSP00000333994,ENSP00000348170,ENSP00000357722	HBB,HP,S100A8
GO:0042221	response to chemical	8	4153	0.0065	ENSP00000229239,ENSP00000257192,ENSP00000306099,ENSP00000333994,ENSP00000336829,ENSP00000339063,ENSP00000348170,ENSP00000357722	DSG1,EEF1A1,FGB,FGG,GAPDH,HBB,HP,S100A8
GO:0002682	regulation of immune system process	5	1391	0.0068	ENSP00000259396,ENSP00000306099,ENSP00000323929,ENSP00000336829,ENSP00000357722	A2M,FGB,FGG,ORM1,S100A8
GO:0019538	protein metabolic process	8	4194	0.0068	ENSP00000229239,ENSP00000306099,ENSP00000323929,ENSP00000336829,ENSP00000339063,ENSP00000357722,ENSP00000376423,ENSP00000406773	A2M,DCD,EEF1A1,FGB,FGG,GAPDH,S100A8,SPRR2A
GO:0010038	response to metal ion	3	339	0.0072	ENSP00000306099,ENSP00000336829,ENSP00000357722	FGB,FGG,S100A8
GO:0045921	positive regulation of exocytosis	2	78	0.0072	ENSP00000306099,ENSP00000336829	FGB,FGG
GO:0051704	multi-organism process	6	2222	0.0072	ENSP00000229239,ENSP00000257192,ENSP00000306099,ENSP00000348170,ENSP00000357722,ENSP00000406773	DCD,DSG1,FGB,GAPDH,HP,S100A8
GO:0051258	protein polymerization	2	83	0.0077	ENSP00000306099,ENSP00000336829	FGB,FGG
GO:0098869	cellular oxidant detoxification	2	86	0.0082	ENSP00000333994,ENSP00000348170	HBB,HP
GO:0031640	killing of cells of other organism	2	89	0.0083	ENSP00000229239,ENSP00000406773	DCD,GAPDH
GO:2001233	regulation of apoptotic signaling pathway	3	388	0.0089	ENSP00000306099,ENSP00000336829,ENSP00000357722	FGB,FGG,S100A8
GO:0090277	positive regulation of peptide hormone secretion	2	95	0.009	ENSP00000306099,ENSP00000336829	FGB,FGG
GO:0052548	regulation of endopeptidase activity	3	393	0.0091	ENSP00000229239,ENSP00000323929,ENSP00000357722	A2M,GAPDH,S100A8
GO:0042493	response to drug	4	900	0.0094	ENSP00000257192,ENSP00000333994,ENSP00000348170,ENSP00000357722	DSG1,HBB,HP,S100A8
GO:0061844	antimicrobial humoral immune response mediated by antimicrobial peptide	2	107	0.0107	ENSP00000229239,ENSP00000406773	DCD,GAPDH
GO:0042542	response to hydrogen peroxide	2	112	0.0115	ENSP00000333994,ENSP00000348170	HBB,HP
GO:0070268	cornification	2	112	0.0115	ENSP00000257192,ENSP00000376423	DSG1,SPRR2A
GO:0065008	regulation of biological quality	7	3559	0.0118	ENSP00000229239,ENSP00000257192,ENSP00000306099,ENSP00000323929,ENSP00000333994,ENSP00000336829,ENSP00000357722	A2M,DSG1,FGB,FGG,GAPDH,HBB,S100A8
GO:0050715	positive regulation of cytokine secretion	2	117	0.0123	ENSP00000229239,ENSP00000259396	GAPDH,ORM1
GO:0007160	cell-matrix adhesion	2	119	0.0126	ENSP00000306099,ENSP00000336829	FGB,FGG
GO:0009636	response to toxic substance	3	468	0.0131	ENSP00000333994,ENSP00000348170,ENSP00000357722	HBB,HP,S100A8
GO:0071347	cellular response to interleukin-1	2	124	0.0131	ENSP00000306099,ENSP00000336829	FGB,FGG
GO:0012501	programmed cell death	4	1042	0.014	ENSP00000229239,ENSP00000257192,ENSP00000357722,ENSP00000376423	DSG1,GAPDH,S100A8,SPRR2A
GO:0051246	regulation of protein metabolic process	6	2668	0.014	ENSP00000229239,ENSP00000306099,ENSP00000323929,ENSP00000336829,ENSP00000339063,ENSP00000357722	A2M,EEF1A1,FGB,FGG,GAPDH,S100A8
GO:0051592	response to calcium ion	2	129	0.014	ENSP00000306099,ENSP00000336829	FGB,FGG
GO:0010033	response to organic substance	6	2815	0.0173	ENSP00000229239,ENSP00000257192,ENSP00000306099,ENSP00000336829,ENSP00000339063,ENSP00000357722	DSG1,EEF1A1,FGB,FGG,GAPDH,S100A8
GO:0050821	protein stabilization	2	166	0.0206	ENSP00000229239,ENSP00000257192	DSG1,GAPDH
GO:2000377	regulation of reactive oxygen species metabolic process	2	169	0.0211	ENSP00000333994,ENSP00000348170	HBB,HP
GO:0070374	positive regulation of ERK1 and ERK2 cascade	2	196	0.0267	ENSP00000306099,ENSP00000336829	FGB,FGG
GO:0006898	receptor-mediated endocytosis	2	209	0.0296	ENSP00000333994,ENSP00000348170	HBB,HP
GO:0045087	innate immune response	3	676	0.03	ENSP00000229239,ENSP00000306099,ENSP00000357722	FGB,GAPDH,S100A8
GO:1901700	response to oxygen-containing compound	4	1427	0.0357	ENSP00000257192,ENSP00000333994,ENSP00000348170,ENSP00000357722	DSG1,HBB,HP,S100A8
GO:0010951	negative regulation of endopeptidase activity	2	242	0.0377	ENSP00000229239,ENSP00000323929	A2M,GAPDH
GO:0031329	regulation of cellular catabolic process	3	743	0.0377	ENSP00000229239,ENSP00000339063,ENSP00000348170	EEF1A1,GAPDH,HP
GO:0042981	regulation of apoptotic process	4	1501	0.0408	ENSP00000229239,ENSP00000306099,ENSP00000336829,ENSP00000357722	FGB,FGG,GAPDH,S100A8
GO:0051240	positive regulation of multicellular organismal process	4	1551	0.0446	ENSP00000229239,ENSP00000259396,ENSP00000306099,ENSP00000336829	FGB,FGG,GAPDH,ORM1
GO:0043086	negative regulation of catalytic activity	3	809	0.0448	ENSP00000229239,ENSP00000323929,ENSP00000348170	A2M,GAPDH,HP
GO:0031323	regulation of cellular metabolic process	8	6082	0.0451	ENSP00000229239,ENSP00000306099,ENSP00000323929,ENSP00000333994,ENSP00000336829,ENSP00000339063,ENSP00000348170,ENSP00000357722	A2M,EEF1A1,FGB,FGG,GAPDH,HBB,HP,S100A8
GO:0032268	regulation of cellular protein metabolic process	5	2486	0.0454	ENSP00000229239,ENSP00000306099,ENSP00000323929,ENSP00000336829,ENSP00000357722	A2M,FGB,FGG,GAPDH,S100A8
GO:0010506	regulation of autophagy	2	286	0.0478	ENSP00000229239,ENSP00000339063	EEF1A1,GAPDH

## Sheet: Figure 6A
#term ID	term description	observed gene count	background gene count	false discovery rate	matching proteins in your network (IDs)	matching proteins in your network (labels)
GO:0006955	immune response	10	1560	5.58e-09	ENSP00000229239,ENSP00000257192,ENSP00000259396,ENSP00000346032,ENSP00000357722,ENSP00000357727,ENSP00000369129,ENSP00000377508,ENSP00000406773,ENSP00000416066	ANXA2,DCD,DSG1,DSP,GAPDH,JUP,ORM1,S100A8,S100A9,SERPINA1
GO:0043312	neutrophil degranulation	8	485	5.58e-09	ENSP00000257192,ENSP00000259396,ENSP00000346032,ENSP00000357722,ENSP00000357727,ENSP00000369129,ENSP00000377508,ENSP00000416066	ANXA2,DSG1,DSP,JUP,ORM1,S100A8,S100A9,SERPINA1
GO:0018119	peptidyl-cysteine S-nitrosylation	3	6	3.1e-07	ENSP00000229239,ENSP00000357722,ENSP00000357727	GAPDH,S100A8,S100A9
GO:0050832	defense response to fungus	4	49	3.51e-07	ENSP00000229239,ENSP00000357722,ENSP00000357727,ENSP00000406773	DCD,GAPDH,S100A8,S100A9
GO:0019730	antimicrobial humoral response	4	143	1.87e-05	ENSP00000229239,ENSP00000357722,ENSP00000357727,ENSP00000406773	DCD,GAPDH,S100A8,S100A9
GO:0098609	cell-cell adhesion	5	416	3.03e-05	ENSP00000257192,ENSP00000357722,ENSP00000357727,ENSP00000369129,ENSP00000377508	DSG1,DSP,JUP,S100A8,S100A9
GO:0035606	peptidyl-cysteine S-trans-nitrosylation	2	2	3.98e-05	ENSP00000229239,ENSP00000357727	GAPDH,S100A9
GO:0070488	neutrophil aggregation	2	2	3.98e-05	ENSP00000357722,ENSP00000357727	S100A8,S100A9
GO:0035821	modification of morphology or physiology of other organism	4	182	4.19e-05	ENSP00000229239,ENSP00000346032,ENSP00000357727,ENSP00000406773	ANXA2,DCD,GAPDH,S100A9
GO:0051050	positive regulation of transport	6	892	4.22e-05	ENSP00000229239,ENSP00000259396,ENSP00000346032,ENSP00000357722,ENSP00000357727,ENSP00000377508	ANXA2,GAPDH,JUP,ORM1,S100A8,S100A9
GO:0032119	sequestering of zinc ion	2	4	8.77e-05	ENSP00000357722,ENSP00000357727	S100A8,S100A9
GO:0012501	programmed cell death	6	1042	9.79e-05	ENSP00000229239,ENSP00000257192,ENSP00000357722,ENSP00000357727,ENSP00000369129,ENSP00000377508	DSG1,DSP,GAPDH,JUP,S100A8,S100A9
GO:0002526	acute inflammatory response	3	73	0.00015	ENSP00000259396,ENSP00000357722,ENSP00000416066	ORM1,S100A8,SERPINA1
GO:0002793	positive regulation of peptide secretion	4	262	0.00015	ENSP00000229239,ENSP00000259396,ENSP00000357722,ENSP00000357727	GAPDH,ORM1,S100A8,S100A9
GO:0086073	bundle of His cell-Purkinje myocyte adhesion involved in cell communication	2	6	0.00015	ENSP00000369129,ENSP00000377508	DSP,JUP
GO:0090087	regulation of peptide transport	5	654	0.00019	ENSP00000229239,ENSP00000259396,ENSP00000357722,ENSP00000357727,ENSP00000377508	GAPDH,JUP,ORM1,S100A8,S100A9
GO:0006952	defense response	6	1234	0.00021	ENSP00000229239,ENSP00000259396,ENSP00000357722,ENSP00000357727,ENSP00000406773,ENSP00000416066	DCD,GAPDH,ORM1,S100A8,S100A9,SERPINA1
GO:0002934	desmosome organization	2	10	0.0003	ENSP00000369129,ENSP00000377508	DSP,JUP
GO:0032602	chemokine production	2	10	0.0003	ENSP00000357722,ENSP00000357727	S100A8,S100A9
GO:0061844	antimicrobial humoral immune response mediated by antimicrobial peptide	3	107	0.00036	ENSP00000229239,ENSP00000357727,ENSP00000406773	DCD,GAPDH,S100A9
GO:0002523	leukocyte migration involved in inflammatory response	2	12	0.00037	ENSP00000357722,ENSP00000357727	S100A8,S100A9
GO:0070268	cornification	3	112	0.00039	ENSP00000257192,ENSP00000369129,ENSP00000377508	DSG1,DSP,JUP
GO:0052548	regulation of endopeptidase activity	4	393	0.00052	ENSP00000229239,ENSP00000357722,ENSP00000357727,ENSP00000416066	GAPDH,S100A8,S100A9,SERPINA1
GO:0098911	regulation of ventricular cardiac muscle cell action potential	2	15	0.00052	ENSP00000369129,ENSP00000377508	DSP,JUP
GO:0065008	regulation of biological quality	8	3559	0.00057	ENSP00000229239,ENSP00000257192,ENSP00000346032,ENSP00000357722,ENSP00000357727,ENSP00000369129,ENSP00000377508,ENSP00000416066	ANXA2,DSG1,DSP,GAPDH,JUP,S100A8,S100A9,SERPINA1
GO:0032879	regulation of localization	7	2524	0.00071	ENSP00000229239,ENSP00000259396,ENSP00000346032,ENSP00000357722,ENSP00000357727,ENSP00000369129,ENSP00000377508	ANXA2,DSP,GAPDH,JUP,ORM1,S100A8,S100A9
GO:0051235	maintenance of location	3	150	0.00075	ENSP00000357722,ENSP00000357727,ENSP00000377508	JUP,S100A8,S100A9
GO:0006954	inflammatory response	4	482	0.00093	ENSP00000259396,ENSP00000357722,ENSP00000357727,ENSP00000416066	ORM1,S100A8,S100A9,SERPINA1
GO:0045216	cell-cell junction organization	3	168	0.00096	ENSP00000257192,ENSP00000369129,ENSP00000377508	DSG1,DSP,JUP
GO:0014002	astrocyte development	2	29	0.0013	ENSP00000357722,ENSP00000357727	S100A8,S100A9
GO:0086091	regulation of heart rate by cardiac conduction	2	37	0.0019	ENSP00000369129,ENSP00000377508	DSP,JUP
GO:0042742	defense response to bacterium	3	250	0.0025	ENSP00000357722,ENSP00000357727,ENSP00000406773	DCD,S100A8,S100A9
GO:0051091	positive regulation of DNA-binding transcription factor activity	3	250	0.0025	ENSP00000357722,ENSP00000357727,ENSP00000377508	JUP,S100A8,S100A9
GO:0006953	acute-phase response	2	45	0.0026	ENSP00000259396,ENSP00000416066	ORM1,SERPINA1
GO:0006950	response to stress	7	3267	0.0027	ENSP00000229239,ENSP00000259396,ENSP00000357722,ENSP00000357727,ENSP00000369129,ENSP00000406773,ENSP00000416066	DCD,DSP,GAPDH,ORM1,S100A8,S100A9,SERPINA1
GO:0051704	multi-organism process	6	2222	0.0029	ENSP00000229239,ENSP00000257192,ENSP00000346032,ENSP00000357722,ENSP00000357727,ENSP00000406773	ANXA2,DCD,DSG1,GAPDH,S100A8,S100A9
GO:2001244	positive regulation of intrinsic apoptotic signaling pathway	2	56	0.0035	ENSP00000357722,ENSP00000357727	S100A8,S100A9
GO:0030593	neutrophil chemotaxis	2	59	0.0038	ENSP00000357722,ENSP00000357727	S100A8,S100A9
GO:0051240	positive regulation of multicellular organismal process	5	1551	0.0048	ENSP00000229239,ENSP00000259396,ENSP00000346032,ENSP00000357727,ENSP00000377508	ANXA2,GAPDH,JUP,ORM1,S100A9
GO:0051851	modification by host of symbiont morphology or physiology	2	71	0.005	ENSP00000229239,ENSP00000346032	ANXA2,GAPDH
GO:0007043	cell-cell junction assembly	2	76	0.0054	ENSP00000257192,ENSP00000377508	DSG1,JUP
GO:0034332	adherens junction organization	2	74	0.0054	ENSP00000369129,ENSP00000377508	DSP,JUP
GO:0030193	regulation of blood coagulation	2	77	0.0055	ENSP00000346032,ENSP00000357727	ANXA2,S100A9
GO:0051222	positive regulation of protein transport	3	365	0.0055	ENSP00000229239,ENSP00000259396,ENSP00000377508	GAPDH,JUP,ORM1
GO:0006919	activation of cysteine-type endopeptidase activity involved in apoptotic process	2	85	0.0063	ENSP00000357722,ENSP00000357727	S100A8,S100A9
GO:0006900	vesicle budding from membrane	2	86	0.0064	ENSP00000346032,ENSP00000416066	ANXA2,SERPINA1
GO:0002224	toll-like receptor signaling pathway	2	87	0.0065	ENSP00000357722,ENSP00000357727	S100A8,S100A9
GO:0007010	cytoskeleton organization	4	953	0.0066	ENSP00000229239,ENSP00000357727,ENSP00000369129,ENSP00000377508	DSP,GAPDH,JUP,S100A9
GO:0031640	killing of cells of other organism	2	89	0.0066	ENSP00000229239,ENSP00000406773	DCD,GAPDH
GO:0051239	regulation of multicellular organismal process	6	2788	0.0071	ENSP00000229239,ENSP00000259396,ENSP00000346032,ENSP00000357727,ENSP00000369129,ENSP00000377508	ANXA2,DSP,GAPDH,JUP,ORM1,S100A9
GO:0009605	response to external stimulus	5	1857	0.0084	ENSP00000229239,ENSP00000357722,ENSP00000357727,ENSP00000377508,ENSP00000406773	DCD,GAPDH,JUP,S100A8,S100A9
GO:0019538	protein metabolic process	7	4194	0.0087	ENSP00000229239,ENSP00000346032,ENSP00000357722,ENSP00000357727,ENSP00000369129,ENSP00000406773,ENSP00000416066	ANXA2,DCD,DSP,GAPDH,S100A8,S100A9,SERPINA1
GO:0042060	wound healing	3	461	0.0089	ENSP00000357722,ENSP00000369129,ENSP00000416066	DSP,S100A8,SERPINA1
GO:0050715	positive regulation of cytokine secretion	2	117	0.0099	ENSP00000229239,ENSP00000259396	GAPDH,ORM1
GO:0050878	regulation of body fluid levels	3	483	0.0099	ENSP00000346032,ENSP00000357727,ENSP00000416066	ANXA2,S100A9,SERPINA1
GO:0050729	positive regulation of inflammatory response	2	120	0.0103	ENSP00000357722,ENSP00000357727	S100A8,S100A9
GO:0051291	protein heterooligomerization	2	126	0.0109	ENSP00000346032,ENSP00000377508	ANXA2,JUP
GO:0002576	platelet degranulation	2	129	0.0114	ENSP00000259396,ENSP00000416066	ORM1,SERPINA1
GO:0006996	organelle organization	6	3131	0.0114	ENSP00000229239,ENSP00000346032,ENSP00000357727,ENSP00000369129,ENSP00000377508,ENSP00000416066	ANXA2,DSP,GAPDH,JUP,S100A9,SERPINA1
GO:0051092	positive regulation of NF-kappaB transcription factor activity	2	142	0.013	ENSP00000357722,ENSP00000357727	S100A8,S100A9
GO:0065009	regulation of molecular function	6	3322	0.0148	ENSP00000229239,ENSP00000346032,ENSP00000357722,ENSP00000357727,ENSP00000377508,ENSP00000416066	ANXA2,GAPDH,JUP,S100A8,S100A9,SERPINA1
GO:0072659	protein localization to plasma membrane	2	156	0.0151	ENSP00000346032,ENSP00000377508	ANXA2,JUP
GO:0030307	positive regulation of cell growth	2	159	0.0154	ENSP00000357722,ENSP00000357727	S100A8,S100A9
GO:0043065	positive regulation of apoptotic process	3	604	0.0158	ENSP00000229239,ENSP00000357722,ENSP00000357727	GAPDH,S100A8,S100A9
GO:0050790	regulation of catalytic activity	5	2249	0.016	ENSP00000229239,ENSP00000346032,ENSP00000357722,ENSP00000357727,ENSP00000416066	ANXA2,GAPDH,S100A8,S100A9,SERPINA1
GO:0050821	protein stabilization	2	166	0.0162	ENSP00000229239,ENSP00000257192	DSG1,GAPDH
GO:0030154	cell differentiation	6	3457	0.0168	ENSP00000257192,ENSP00000346032,ENSP00000357722,ENSP00000357727,ENSP00000369129,ENSP00000377508	ANXA2,DSG1,DSP,JUP,S100A8,S100A9
GO:0032388	positive regulation of intracellular transport	2	174	0.0172	ENSP00000346032,ENSP00000377508	ANXA2,JUP
GO:0045087	innate immune response	3	676	0.0195	ENSP00000229239,ENSP00000357722,ENSP00000357727	GAPDH,S100A8,S100A9
GO:0043903	regulation of symbiosis, encompassing mutualism through parasitism	2	203	0.0215	ENSP00000229239,ENSP00000346032	ANXA2,GAPDH
GO:0032268	regulation of cellular protein metabolic process	5	2486	0.0221	ENSP00000229239,ENSP00000346032,ENSP00000357722,ENSP00000357727,ENSP00000416066	ANXA2,GAPDH,S100A8,S100A9,SERPINA1
GO:0016043	cellular component organization	7	5163	0.0224	ENSP00000229239,ENSP00000257192,ENSP00000346032,ENSP00000357727,ENSP00000369129,ENSP00000377508,ENSP00000416066	ANXA2,DSG1,DSP,GAPDH,JUP,S100A9,SERPINA1
GO:0032101	regulation of response to external stimulus	3	732	0.0235	ENSP00000346032,ENSP00000357722,ENSP00000357727	ANXA2,S100A8,S100A9
GO:0097305	response to alcohol	2	233	0.0269	ENSP00000357722,ENSP00000377508	JUP,S100A8
GO:0006914	autophagy	2	240	0.0283	ENSP00000357722,ENSP00000357727	S100A8,S100A9
GO:0010951	negative regulation of endopeptidase activity	2	242	0.0283	ENSP00000229239,ENSP00000416066	GAPDH,SERPINA1
GO:0070887	cellular response to chemical stimulus	5	2672	0.0283	ENSP00000229239,ENSP00000346032,ENSP00000357722,ENSP00000357727,ENSP00000377508	ANXA2,GAPDH,JUP,S100A8,S100A9
GO:0016477	cell migration	3	812	0.0292	ENSP00000357722,ENSP00000357727,ENSP00000377508	JUP,S100A8,S100A9
GO:0023056	positive regulation of signaling	4	1638	0.0292	ENSP00000346032,ENSP00000357722,ENSP00000357727,ENSP00000377508	ANXA2,JUP,S100A8,S100A9
GO:0043086	negative regulation of catalytic activity	3	809	0.0292	ENSP00000229239,ENSP00000346032,ENSP00000416066	ANXA2,GAPDH,SERPINA1
GO:0044093	positive regulation of molecular function	4	1713	0.0328	ENSP00000346032,ENSP00000357722,ENSP00000357727,ENSP00000377508	ANXA2,JUP,S100A8,S100A9
GO:0010033	response to organic substance	5	2815	0.0335	ENSP00000229239,ENSP00000257192,ENSP00000346032,ENSP00000357722,ENSP00000377508	ANXA2,DSG1,GAPDH,JUP,S100A8
GO:0048731	system development	6	4144	0.0346	ENSP00000257192,ENSP00000346032,ENSP00000357722,ENSP00000357727,ENSP00000369129,ENSP00000377508	ANXA2,DSG1,DSP,JUP,S100A8,S100A9
GO:0042221	response to chemical	6	4153	0.0348	ENSP00000229239,ENSP00000257192,ENSP00000346032,ENSP00000357722,ENSP00000357727,ENSP00000377508	ANXA2,DSG1,GAPDH,JUP,S100A8,S100A9
GO:0042493	response to drug	3	900	0.0368	ENSP00000257192,ENSP00000357722,ENSP00000377508	DSG1,JUP,S100A8
GO:0006915	apoptotic process	3	915	0.0378	ENSP00000229239,ENSP00000357722,ENSP00000357727	GAPDH,S100A8,S100A9
GO:0009056	catabolic process	4	1859	0.0415	ENSP00000229239,ENSP00000346032,ENSP00000357722,ENSP00000357727	ANXA2,GAPDH,S100A8,S100A9
GO:0006464	cellular protein modification process	5	2999	0.0418	ENSP00000229239,ENSP00000357722,ENSP00000357727,ENSP00000369129,ENSP00000416066	DSP,GAPDH,S100A8,S100A9,SERPINA1
GO:0006417	regulation of translation	2	327	0.044	ENSP00000229239,ENSP00000357727	GAPDH,S100A9
GO:0032269	negative regulation of cellular protein metabolic process	3	1014	0.0473	ENSP00000229239,ENSP00000346032,ENSP00000416066	ANXA2,GAPDH,SERPINA1
